# Supplementary material for: α-Amido sulphones as useful intermediates in the preparation ofC-chiral α-aminophosphonates and α-aminophosphonic acids
Source: Royal Society of Chemistry journal article supplement (doi:10.1039/d3ob00924f), 2023-01-01
Supplement: d3ob00924f1.pdf [file d3ob00924f1.pdf]

# Supporting Information

## **$\alpha$ -Amido sulphones as useful intermediates in the preparation of C-chiral $\alpha$ -aminophosphonates and $\alpha$ -aminophosphonic acids**

Joseph D. Gbubele,<sup>1</sup> Tomasz Misiaszek,<sup>1</sup> Miłosz Siczek<sup>2</sup> and Tomasz K. Olszewski<sup>1,\*</sup>

<sup>1</sup>Department of Physical and Quantum Chemistry, Faculty of Chemistry, Wrocław University of Science and Technology, ul. Wybrzeże Wyspiańskiego 27, 50-370 Wrocław, Poland.

<sup>2</sup>Department of Chemistry, University of Wrocław, F. Joliot-Curie 14, Wrocław, Poland

Correspondence to: [tomasz.olszewski@pwr.edu.pl](mailto:tomasz.olszewski@pwr.edu.pl) (TKO)

### Table of Contents

|                                                                                                                                                                              |    |
|------------------------------------------------------------------------------------------------------------------------------------------------------------------------------|----|
| 1. General information .....                                                                                                                                                 | 2  |
| 2. Optimization of the reaction .....                                                                                                                                        | 2  |
| 2.1 Optimization of the reaction for the non-asymmetric hydrophosphonylation of $\alpha$ -amido sulphones with non-chiral phosphonates .....                                 | 2  |
| 2.2 Optimization of the reaction of the asymmetric hydrophosphonylation of $\alpha$ -amido sulphones with chiral TADDOL derived <i>H</i> - phosphonate ( <i>R,R</i> )-5..... | 3  |
| 3. General Procedure for the Preparation of the Sulfoxes and spectra characterization .....                                                                                  | 4  |
| 4. General Procedure for the Preparation of Phosphonates with spectra characterizations .....                                                                                | 7  |
| 5. Deprotection .....                                                                                                                                                        | 12 |
| 6. General procedure of the asymmetric hydrophosphonylation of $\alpha$ -amido sulphones.....                                                                                | 13 |
| 7. General protocol for the cleavage of the chiral auxiliary and the Iminic substituent .....                                                                                | 17 |
| 8. X-Ray Analysis.....                                                                                                                                                       | 17 |
| 9. Chiroptical analysis - ECD Measurements. ....                                                                                                                             | 29 |
| 10. NMR spectra .....                                                                                                                                                        | 30 |
| 11. References.....                                                                                                                                                          | 90 |

## 1. General information

All the substrates and solvents were of analytical grade purchased from Polish suppliers (Sigma Aldrich and POCh) and used without further purification. Unless otherwise specified solvents were removed using rotary evaporator. The  $^1\text{H}$ ,  $^{13}\text{C}$  and  $^{31}\text{P}$  NMR spectra were collected on a Jeol 400yh instrument (400 MHz for  $^1\text{H}$  NMR, 162 MHz for  $^{31}\text{P}$  NMR and 101 MHz for  $^{13}\text{C}$  NMR) and were processed with dedicated software (Delta 5.0.5). Samples of the product were diluted with  $\text{CDCl}_3$ ,  $\text{DMSO-d}_6$  or  $\text{D}_2\text{O}$  with referenced to the respective residual  $^1\text{H}$  or  $^{13}\text{C}$  signals of the solvents. Coupling constant were reported in Hertz (Hz). Multiplicities are reported with the abbreviations: s (singlet), brs (broad singlet), d (doublet), t (triplet), m (multiplet) and the reported J values are those observed from the splitting patterns in the spectrum and may not reflect the true coupling constant values. Analytical thin layer chromatography was performed on SIL G/UV254 plates and visualization was accomplished by UV light (254 nm). Column chromatography (FC) was performed using Sigma-Aldrich® silica gel high purity-grade ( $\text{SiO}_2$  70-230 mesh). The optical rotations were measured on a Bellingham+Stanley ADP440+ polarimeter and  $[\alpha]_{\text{D}}^{\text{T}}$  values are given in  $\text{deg cm}^3 \text{g}^{-1} \text{dm}^{-1}$ ; concentrations, c, are listed in  $0.05 \text{g mL}^{-1}$ . Mass spectra were recorded using a water LCT Premier XE mass spectrometer (electrospray ionization, ESI) (Water, Milford, MA, USA) and melting point were determined on SRS melting point apparatus OptiMelt MPA 100 (Stanford Research System, Sunnyvale, CA USA) and are reported at Faculty of Chemistry Wroclaw University of Science and Technology

## 2. Optimization of the reaction

### 2.1 Optimization of the reaction for the non-asymmetric hydrophosphonylation of $\alpha$ -amido sulphones with non-chiral phosphonates

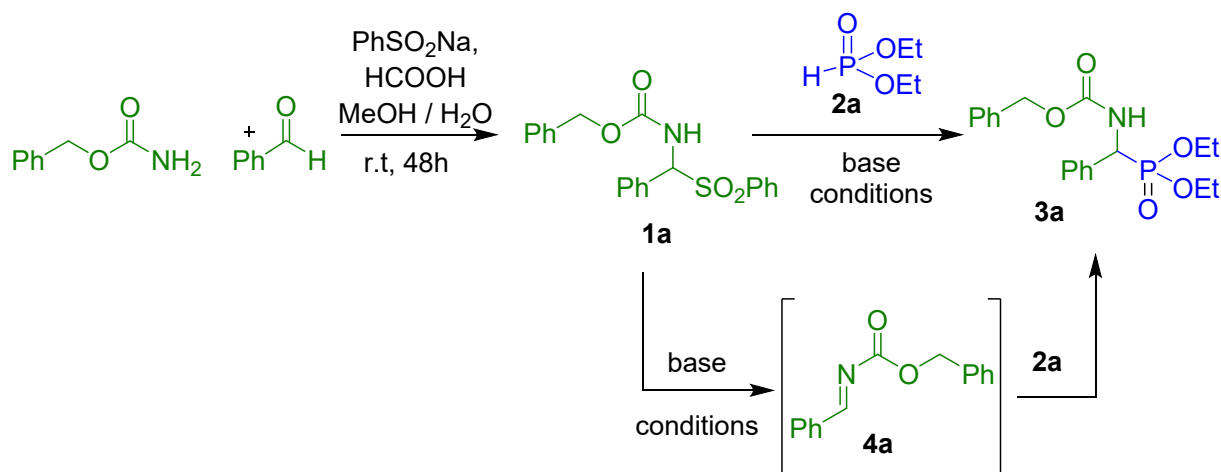

| Entry | Conditions                                        | Conversion (%) <sup>b</sup>         |
|-------|---------------------------------------------------|-------------------------------------|
| 1.    | no base, r.t, 24h, THF                            | 0                                   |
| 2.    | $\text{K}_2\text{CO}_3$ (4 equiv), r.t., 24h, THF | 30% <sup>b</sup>                    |
| 3.    | $\text{K}_2\text{CO}_3$ (4 equiv), 66°C, 4h, THF  | 99% <sup>b</sup> [95%] <sup>c</sup> |
| 4.    | Pyridine (4 equiv), 66°C, 4h, THF                 | 0                                   |

|     |                                                                   |                      |
|-----|-------------------------------------------------------------------|----------------------|
| 5.  | Cs <sub>2</sub> CO <sub>3</sub> (4 equiv), 66°C, 4h, THF          | 74                   |
| 6.  | Et <sub>3</sub> N (4 equiv), 66°C, 4h, THF                        | 0                    |
| 7.  | NaOH (4 equiv), 66°C, 4h, THF                                     | 81                   |
| 8.  | Diisopropylamine (4 equiv), 66°C, 4h, THF                         | 5                    |
| 9.  | L-proline (4 equiv), 66°C, 4h, THF                                | 0                    |
| 10. | K <sub>2</sub> CO <sub>3</sub> (4 equiv), 64°C, 4h, MeOH          | 0                    |
| 11. | K <sub>2</sub> CO <sub>3</sub> (4 equiv), 77°C, 4h, ethyl acetate | 42 (56) <sup>d</sup> |
| 12. | K <sub>2</sub> CO <sub>3</sub> (4 equiv), 80°C, 4h, 2-methyl THF  | 66 (89) <sup>d</sup> |
| 13. | K <sub>2</sub> CO <sub>3</sub> (4 equiv), 82°C, 4h, acetonitrile  | 50 (94) <sup>d</sup> |
| 14. | K <sub>2</sub> CO <sub>3</sub> (4 equiv), 101°C, 4h, 1,4-dioxane  | 54 (80) <sup>d</sup> |
| 15. | K <sub>2</sub> CO <sub>3</sub> (2 equiv), 66°C, 4h, THF           | 60                   |
| 16. | K <sub>2</sub> CO <sub>3</sub> (6 equiv), 66°C, 4h, THF           | 97                   |

<sup>a</sup>General reaction conditions (unless otherwise stated):  $\alpha$ -amido sulphone **1a** (2.4 mmol), *H*-phosphonate **2a** (2.4 mmol), base (9.6 mmol). <sup>c</sup>Conversion based on the <sup>31</sup>P NMR spectra of the crude reaction mixture. <sup>e</sup>Isolated yield in square bracket. <sup>d</sup>Reaction time 8h.

## 2.2 Optimization of the reaction of the asymmetric hydrophosphonylation of $\alpha$ -amido sulphones with chiral TADDOL derived *H*-phosphonate (*R,R*)-5

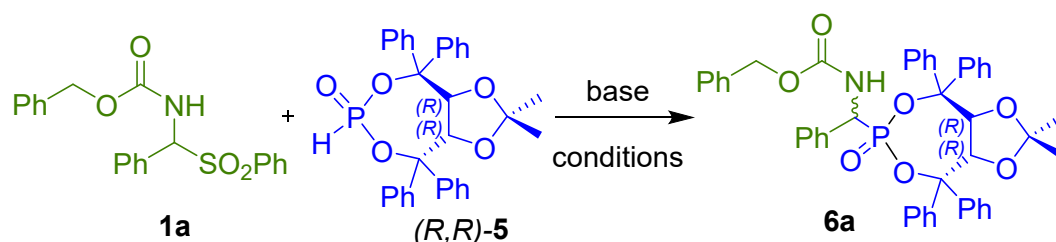

| Entry | Conditions                                                                                                                 | Diastereomeric ratio <i>dr</i> (%) <sup>b</sup><br>/Conversion [%] <sup>b</sup> |
|-------|----------------------------------------------------------------------------------------------------------------------------|---------------------------------------------------------------------------------|
| 1.    | K <sub>2</sub> CO <sub>3</sub> (4 equiv), 66°C, 4h, THF                                                                    | 35:65 [80]                                                                      |
| 2.    | Cs <sub>2</sub> CO <sub>3</sub> (4 equiv), 66°C, 4h, THF                                                                   | 33:67 [97]                                                                      |
| 3.    | NaOH (4 equiv), 66°C, 4h, THF                                                                                              | 36:64 [87]                                                                      |
| 4.    | KOH (4 equiv), 66°C, 4h, THF                                                                                               | 34:66 [90]                                                                      |
| 5.    | Pyridine (4 equiv), 66°C, 4h, THF                                                                                          | -                                                                               |
| 6.    | Et <sub>3</sub> N (4 equiv), 66°C, 4h, THF                                                                                 | -                                                                               |
| 7.    | Cs <sub>2</sub> CO <sub>3</sub> (4 equiv), 80°C, 4h, 2-methyl THF                                                          | 36:64 [89]                                                                      |
| 8.    | Cs <sub>2</sub> CO <sub>3</sub> (4 equiv), 110°C, 4h, toluene                                                              | 65:35 [97]                                                                      |
| 9.    | Cs <sub>2</sub> CO <sub>3</sub> (4 equiv), 82°C, 4h, acetonitrile                                                          | 45:55 [84]                                                                      |
| 10.   | KOH (2.5 equiv), Fe <sub>2</sub> O <sub>3</sub> , r.t., 5 days, CH <sub>2</sub> Cl <sub>2</sub>                            | 60:40 [80] <sup>c</sup>                                                         |
| 11.   | KOH (2.5 equiv), Al <sub>2</sub> O <sub>3</sub> , r.t., 5 days, CH <sub>2</sub> Cl <sub>2</sub>                            | 25:75 [89] <sup>c</sup>                                                         |
| 12.   | KOH (2.5 equiv), ZnO, r.t., 5 days, CH <sub>2</sub> Cl <sub>2</sub>                                                        | 30:70 [76] <sup>c</sup>                                                         |
| 13.   | KOH (2.5 equiv), MgO, r.t., 5 days, CH <sub>2</sub> Cl <sub>2</sub>                                                        | 35:65 [74] <sup>c</sup>                                                         |
| 14.   | K <sub>2</sub> CO <sub>3</sub> (2.5 equiv), Al <sub>2</sub> O <sub>3</sub> , r.t., 5 days, CH <sub>2</sub> Cl <sub>2</sub> | 22:78 [98] <sup>c</sup>                                                         |
| 15.   | NaOH (2.5 equiv), Al <sub>2</sub> O <sub>3</sub> , r.t., 5 days, CH <sub>2</sub> Cl <sub>2</sub>                           | 40:60 [98] <sup>c</sup>                                                         |
| 16.   | <i>n</i> -BuLi (1 equiv), 12h, -78°C, THF                                                                                  | - <sup>d</sup>                                                                  |
| 17.   | LDA (1 equiv), 12h, -78°C, THF                                                                                             | - <sup>d</sup>                                                                  |
| 18.   | ZnEt <sub>2</sub> / (TMEDA) (1 equiv), 12h, -78°C, THF                                                                     | 100 [74] <sup>d</sup>                                                           |
| 19.   | <b>KOH (3 equiv), -78°C, 5 days, THF</b>                                                                                   | <b>100 [95]</b>                                                                 |

<sup>a</sup>General reaction conditions (unless otherwise stated):  $\alpha$ -amido sulphone **1a** (2.4 mmol), *H*-phosphonate (*R,R*)-5 (2.4 mmol), base (9.6 mmol). <sup>b</sup>Diastereoselectivity and conversion based on the <sup>31</sup>P NMR spectra of the crude reaction mixture. – no reaction. <sup>c</sup>For 6.5 g of metal oxide for 6 mmol of base. <sup>d</sup>The imine was first generated by

reacting of **1a** with  $K_2CO_3$  (2 equiv) at 66°C for 4h in THF and after filtration the filtrate containing the imine was transferred to a separate flask and cooled to -78°C followed by addition of a base and (*R,R*)-**5**.

### 3. General procedure for the preparation of the sulfones and spectra characterization

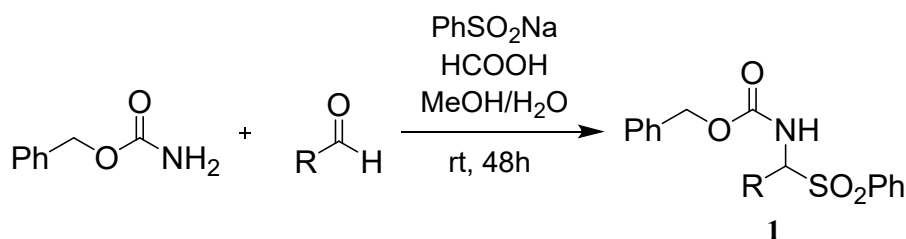

The synthesis of the sulphones was carried out according to the protocol reported by Tillman et al<sup>1</sup>. In a 100 mL flask, the corresponding aldehyde (9.4 mmol, 1.5 equ.) was added to a rapidly stirred suspension of benzyl carbamate (6.3 mmol, 1 equ.) and benzenesulfinic acid sodium salt (12.5 mmol, 2 equ.) in methanol (6mL) and water (12mL), followed by formic acid (0.94 mL). The reaction mixture was stirred for 48 h at room temperature. The resulting precipitate formed during the reaction was filtered and washed with water and diethyl ether, then dried in vacuo to yield the sulfone which was used without further purification. Spectral data for **1a**,<sup>2</sup> **1j**,<sup>2</sup> **1b**<sup>3</sup> and **1d**<sup>4</sup> agree with those previously reported in the literature.

#### Benzyl (phenyl(phenylsulfonyl)methyl)carbamate (**1a**)

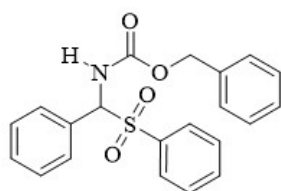

White solid; 1.98g, 55% yield; mp: 154-156 °C. <sup>1</sup>H NMR (400 MHz, CDCl<sub>3</sub>) δ: 7.83 (d, *J* = 7.7 Hz, 2H), 7.59 (t, *J* = 7.5 Hz, 1H), 7.47 – 7.30 (m, 10H), 7.22 (brs, 2H), 6.16 (d, *J* = 10.7 Hz, 1H), 5.97 (d, *J* = 10.8 Hz, 1H), 4.96 – 4.88 (m, 2H); <sup>13</sup>C NMR (101 MHz, CDCl<sub>3</sub>) δ: 154.77, 136.50, 135.57, 134.59, 134.23, 130.04, 129.82, 129.52, 129.10, 128.89, 128.67, 128.35, 124.94, 74.60, 67.77. HRMS (ESI) calculated for C<sub>21</sub>H<sub>19</sub>NO<sub>4</sub>SNa [M<sup>+</sup>Na]<sup>+</sup>: 404.0933 found 404.0933

#### Benzyl ((4-chlorophenyl)(phenylsulfonyl)methyl)carbamate (**1b**)

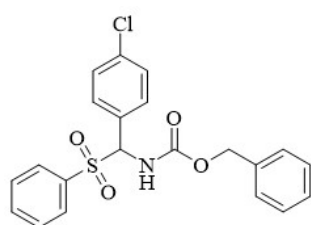

White solid; 1.48g, 38% yield; mp: 152-153 °C. <sup>1</sup>H NMR (400 MHz, DMSO-d<sub>6</sub>) δ: 9.14 (d, *J* = 10.7 Hz, 1H), 7.80 (d, *J* = 7.4 Hz, 2H), 7.72 (t, *J* = 7.5 Hz, 1H), 7.64 (d, *J* = 8.5 Hz, 2H), 7.56 (t, *J* = 7.8 Hz, 2H), 7.45 (d, *J* = 8.5 Hz, 2H), 7.35 – 7.24 (m, 3H), 7.15 (d, *J* = 6.5 Hz, 2H), 6.14 (d, *J* = 10.7 Hz, 1H), 4.85 (d, *J* = 12.5 Hz, 1H), 4.80 (d, *J* = 12.6 Hz, 1H); <sup>13</sup>C NMR (101 MHz, DMSO-d<sub>6</sub>) δ: 155.67, 136.97, 136.78, 134.87 (d, *J* = 13.7 Hz), 132.02, 129.92 – 129.49 (m), 128.90, 128.75, 128.24, 125.01, 74.60, 66.64. HRMS (ESI) calculated for C<sub>21</sub>H<sub>18</sub>ClNO<sub>4</sub>SNa [M<sup>+</sup>Na]<sup>+</sup>: 438.0543 found 438.0544.

### Benzyl ((4-fluorophenyl)(phenylsulfonyl)methyl)carbamate (1c)

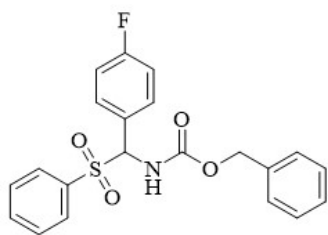

White solid; 1.64g, 44% yield; mp: ;162-164 °C.  $^1\text{H NMR}$  (400 MHz, DMSO- $d_6$ )  $\delta$ : 9.12 (d,  $J = 10.7$  Hz, 1H), 7.79 (d,  $J = 7.2$  Hz, 2H), 7.74 – 7.63 (m, 3H), 7.55 (t,  $J = 7.8$  Hz, 2H), 7.36 – 7.13 (m, 7H), 6.12 (d,  $J = 10.7$  Hz, 1H), 4.94 – 4.78 (m, 2H);  $^{13}\text{C NMR}$  (101 MHz, DMSO- $d_6$ )  $\delta$ : 164.52, 162.07, 155.68, 137.02, 136.79, 134.74, 132.48 (d,  $J = 8.5$  Hz), 129.63 (d,  $J = 6.7$  Hz), 128.90, 128.49, 128.26, 128.07, 127.97, 127.13, 124.79, 115.67 (d,  $J = 21.7$  Hz), 74.54, 66.62. HRMS (ESI) calculated for  $\text{C}_{21}\text{H}_{18}\text{FNO}_4\text{SNa}$  [ $\text{M}^+\text{Na}$ ] $^+$ : 422.0838 found 422.0829.

### Benzyl ((phenylsulfonyl)(p-tolyl)methyl)carbamate (1d)

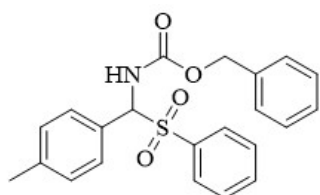

White solid; 2.20g, 59% yield, mp: 157-158 °C.  $^1\text{H NMR}$  (400 MHz, DMSO- $d_6$ )  $\delta$ : 9.08 (d,  $J = 10.7$  Hz, 1H), 7.79 (d,  $J = 7.2$  Hz, 2H), 7.70 (t,  $J = 7.5$  Hz, 1H), 7.55 (t,  $J = 7.7$  Hz, 2H), 7.47 (d,  $J = 8.2$  Hz, 2H), 7.35 – 7.24 (m, 3H), 7.19 – 7.10 (m, 4H), 6.00 (d,  $J = 10.7$  Hz, 1H), 4.87 – 4.77 (m, 2H), 2.28 (s, 3H);  $^{13}\text{C NMR}$  (101 MHz, DMSO- $d_6$ )  $\delta$ : 155.73, 139.49, 137.30, 136.85, 134.62, 130.27, 130.10, 129.62, 129.56, 129.25, 128.89, 128.46, 128.21, 127.68, 75.24, 66.54, 21.36. HRMS (ESI) calculated for  $\text{C}_{22}\text{H}_{21}\text{NO}_4\text{SNa}$  [ $\text{M}^+\text{Na}$ ] $^+$ : 418.1089 found 418.1091.

### Benzyl ((phenylsulfonyl)(pyridin-2-yl)methyl)carbamate (1e)

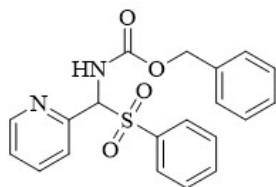

White solid; 1.51g, 42% yield; mp: 144-146 °C.  $^1\text{H NMR}$  (400 MHz,  $\text{CDCl}_3$ )  $\delta$ : 8.52 (d,  $J = 4.5$  Hz, 1H), 7.77 (t,  $J = 6.7$  Hz, 4H), 7.66 – 7.55 (m, 3H), 7.41 (t,  $J = 7.8$  Hz, 3H), 7.38 – 7.29 (m, 5H), 7.25 (d,  $J = 5.7$  Hz, 2H), 7.05 (d,  $J = 9.1$  Hz, 1H), 6.08 (d,  $J = 9.2$  Hz, 1H), 5.03 – 4.89 (m, 2H);  $^{13}\text{C NMR}$  (101 MHz, DMSO- $d_6$ )  $\delta$ : 155.73, 150.35, 149.53, 137.50, 137.12, 136.84, 134.81, 129.68, 129.59, 128.90, 128.47, 128.20, 125.16, 125.02, 76.86, 66.74. HRMS (ESI) calculated for  $\text{C}_{20}\text{H}_{18}\text{N}_2\text{O}_4\text{SNa}$  [ $\text{M}^+\text{Na}$ ] $^+$ : 405.0885 found 405.0892.

### Benzyl (1-(phenylsulfonyl)propyl)carbamate (1f)

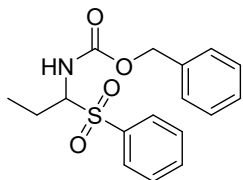

White solid; 2.15g, 68% yield; mp: 96-98 °C.  $^1\text{H NMR}$  (400 MHz,  $\text{CDCl}_3$ )  $\delta$ : 7.86 (d,  $J = 7.2$  Hz, 2H), 7.58 (t,  $J = 7.5$  Hz, 1H), 7.42 (t,  $J = 7.8$  Hz, 2H), 7.36 – 7.24 (m, 3H), 7.21 – 7.13 (m, 2H), 5.28 (d,  $J = 10.8$  Hz, 1H), 4.93 – 4.74 (m, 3H), 2.36 – 2.22 (m, 1H), 1.84 – 1.68 (m, 1H), 1.06 (t,  $J = 7.4$  Hz, 3H);  $^{13}\text{C NMR}$  (101 MHz,  $\text{CDCl}_3$ )  $\delta$ : 155.17, 136.73, 135.76, 134.09, 129.52 – 128.96 (m), 128.70 – 127.98 (m), 72.76, 67.39, 20.22, 10.01. HRMS (ESI) calculated for  $\text{C}_{17}\text{H}_{19}\text{NO}_4\text{SNa}$  [ $\text{M}^+\text{Na}$ ] $^+$ : 356.0933 found 356.0931.

### Benzyl (2-methyl-1-(phenylsulfonyl)propyl)carbamate (1g)

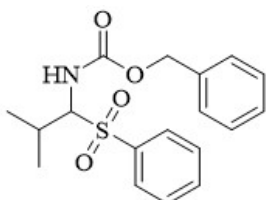

White solid; 1.99g, 61% yield; mp: 116-118 °C.  $^1\text{H NMR}$  (400 MHz,  $\text{CDCl}_3$ )  $\delta$  7.83 (d,  $J = 7.3$  Hz, 2H), 7.57 (t,  $J = 7.5$  Hz, 1H), 7.41 (t,  $J = 7.8$  Hz, 2H), 7.36 – 7.24 (m, 3H), 7.21 – 6.96 (m, 2H), 5.40 (d,  $J = 11.2$  Hz, 1H), 4.92 – 4.73 (m, 3H), 2.81 – 2.71 (m, 1H), 1.12 (d,  $J = 6.8$  Hz, 3H), 1.08 (d,  $J = 6.9$  Hz, 3H);  $^{13}\text{C NMR}$  (101 MHz,  $\text{CDCl}_3$ )  $\delta$  155.25, 137.74, 135.69, 133.97, 132.01, 129.09, 128.94, 128.66, 128.48, 128.28, 127.96, 126.72, 125.02, 75.00, 67.50, 26.93, 20.77, 16.98. HRMS (ESI) calculated for  $\text{C}_{18}\text{H}_{21}\text{NO}_4\text{SNa}$   $[\text{M}^+\text{Na}]^+$ : 370.1089 found 370.1095.

### Benzyl (3-methyl-1-(phenylsulfonyl)butyl)carbamate (1i)

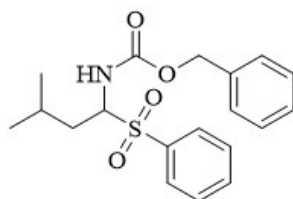

White solid; 1.94g; 57% yield; mp: 138-140 °C;  $^1\text{H NMR}$  (400 MHz,  $\text{CDCl}_3$ )  $\delta$  7.86 (d,  $J = 7.3$  Hz, 2H), 7.57 (t,  $J = 7.5$  Hz, 1H), 7.41 (t,  $J = 7.8$  Hz, 2H), 7.35 – 7.24 (m, 3H), 7.20 – 7.03 (m, 2H), 5.30 (d,  $J = 10.8$  Hz, 1H), 4.99 – 4.75 (m, 3H), 2.04 – 1.96 (m, 1H), 1.81 – 1.69 (m, 2H), 0.98 (d,  $J = 6.5$  Hz, 3H), 0.91 (d,  $J = 6.5$  Hz, 3H);  $^{13}\text{C NMR}$  (101 MHz,  $\text{CDCl}_3$ )  $\delta$  154.83, 136.59, 135.71, 134.06, 129.46, 129.32, 129.16, 129.05, 128.62, 128.43, 128.23, 128.03, 125.07, 70.24, 67.40, 34.70, 24.76, 23.34, 21.19. HRMS (ESI) calculated for  $\text{C}_{19}\text{H}_{23}\text{ClNO}_4\text{SNa}$   $[\text{M}^+\text{Na}]^+$ : 384.1245 found 384.1237.

### Benzyl ((2,4-dimethoxyphenyl)(phenylsulfonyl)methyl)carbamate (1i)

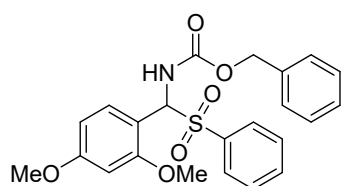

White solid; 2.40g, 58% yield; mp:130-132 °C;  $^1\text{H NMR}$  (400 MHz,  $\text{DMSO-d}_6$ )  $\delta$ : 9.09 (d,  $J = 10.5$  Hz, 1H), 7.823– 7.71 (m, 3H), 7.59 (t,  $J = 7.5$  Hz, 2H), 7.42 – 7.33 (m, 3H), 7.29-7.18 (m, 3H), 7.13 (d,  $J = 7.9$  Hz, 1H), 6.95 (d,  $J = 8.2$  Hz, 1H), 6.01 (d,  $J = 10.5$  Hz, 1H), 4.99 – 4.77 (m, 2H), 3.76 (s, 3H), 3.69 (s, 3H);  $^{13}\text{C NMR}$  (101 MHz,  $\text{DMSO-d}_6$ ),  $\delta$ :  $^{13}\text{C NMR}$  (101 MHz,  $\text{DMSO-d}_6$ )  $\delta$ :157.13, 155.72, 154.71, 150.12, 148.77, 137.89, 134.53, 131.91, 129.51, 128.86, 128.23,126.69, 126.01, 125.01, 122.73, 111.79, 109.89, 75.52, 66.60, 65.39, 56.41, 56.03.

### Benzyl (naphthalen-2-yl(phenylsulfonyl)methyl)carbamate (1j)

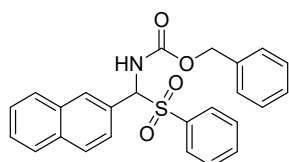

White solid; 2.52g; 62% yield; mp:152-154 °C;  $^1\text{H NMR}$  (400 MHz,  $\text{DMSO-d}_6$ )  $\delta$ : 9.26 (d,  $J = 10.7$  Hz, 1H), 8.16 (s, 1H), 7.95 – 7.79 (m, 5H), 7.77 – 7.63 (m, 2H), 7.60 – 7.50 (m, 2H), 7.29 (dd,  $J = 8.7, 6.4$  Hz, 3H), 7.16 (d,  $J = 6.6$  Hz, 2H), 6.24 (d,  $J = 10.7$  Hz, 1H), 4.95 – 4.77 (m, 2H);  $^{13}\text{C NMR}$  (101 MHz,  $\text{DMSO-d}_6$ ),  $\delta$ :157.14, 155.78, 137.91, 137.19, 136.3, 135.11, 134.36, 133.59, 132.77, 130.11, 129.81, 129.52, 128.84, 128.53, 128.22, 127.79, 127.57, 127.16, 125.02, 122.83, 75.59, 66.62, 65.39.

### Benzyl (1-(phenylsulfonyl)ethyl)carbamate (1k)

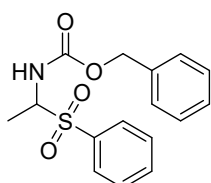

White solid; 1.35g, 45% yield; mp: 102-106 °C. <sup>1</sup>H NMR (400 MHz, CDCl<sub>3</sub>) δ: 7.87 (d, *J* = 7.2 Hz, 2H), 7.59 (t, *J* = 7.5 Hz, 1H), 7.44 (t, *J* = 7.8 Hz, 2H), 7.37 – 7.24 (m, 3H), 7.22 – 7.06 (m, 2H), 5.36 (d, *J* = 10.5 Hz, 1H), 5.11 – 4.95 (m, 1H), 4.85 (s, 2H), 1.61 (d, *J* = 7.0 Hz, 3H); <sup>13</sup>C NMR (101 MHz, CDCl<sub>3</sub>) δ: 154.63, 136.32, 135.74, 134.16, 129.39, 129.12, 128.63, 128.44, 128.25, 67.44 (d, *J* = 15.9 Hz), 13.15. HRMS (ESI) calculated for C<sub>16</sub>H<sub>17</sub>NO<sub>4</sub>SNa [M<sup>+</sup>Na]<sup>+</sup>: 342.0776 found 342.0785

#### 4. General procedure for the preparation of phosphonates with spectra characterizations

In a 50 mL flask, dialkyl phosphite (2.4mmol, 1 equiv.) was added to a solution of sulfone (2.4mmol, 1 equiv.) and K<sub>2</sub>CO<sub>3</sub> (9.6 mmol, 4 equiv.) in THF (15 mL). the mixture was heated 66 °C for 4 h and then cooled and filtered. The solvent and volatile components are removed under reduced pressure using a rotatory evaporator. The crude product was crystallized from diethyl ether in the case of solids. Oily products are purified by column chromatography (eluent: Hexane/ethyl acetate = 5:1 to 3:1) to obtain the pure product **3**. Spectral data for **3a**, **3e**, **3i**, **3j**<sup>5</sup>, **3b**<sup>6</sup>, **3d**<sup>7</sup> **3p**<sup>8</sup>, and **3r**<sup>5</sup> agreed with those previously reported in the literature.

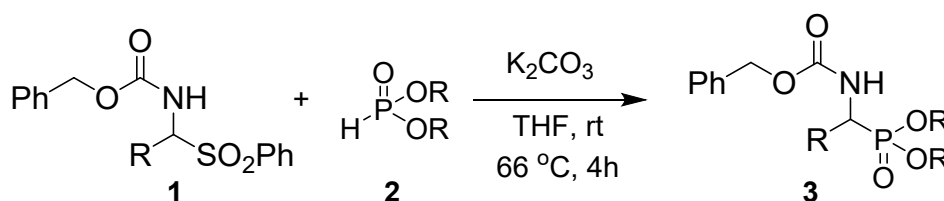

#### Benzyl ((diethoxyphosphoryl)(phenyl)methyl)carbamate (**3a**)

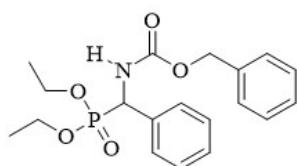

White solid; 860mg, 95% yield; mp: 112-114 °C. <sup>1</sup>H NMR (400 MHz, DMSO-d<sub>6</sub>) δ: 8.43 (d, *J* = 10.8 Hz, 1H), 7.43 (d, *J* = 7.9 Hz, 2H), 7.34 – 7.22 (m, 8H), 5.11 – 4.96 (m, 3H), 4.02 – 3.71 (m, 4H), 1.10 (t, *J* = 7.0 Hz, 3H), 1.03 (t, *J* = 7.0 Hz, 3H); <sup>13</sup>C NMR (101 MHz, DMSO-d<sub>6</sub>) δ: 156.48 (d, *J* = 8.6 Hz), 137.38, 136.24, 128.86, 128.74, 128.69, 128.64, 128.40, 128.31, 128.13, 126.01, 66.38, 62.99 (d, *J* = 7.1 Hz), 62.77 (d, *J* = 6.8 Hz), 52.72 (d, *J* = 153.6 Hz), 16.72 (d, *J* = 5.4 Hz), 16.58 (d, *J* = 5.6 Hz); <sup>31</sup>P NMR (162 MHz, DMSO-d<sub>6</sub>) δ: 21.97. HRMS (ESI) calculated for C<sub>19</sub>H<sub>24</sub>NO<sub>5</sub>PNa [M<sup>+</sup>Na]<sup>+</sup>: 400.1290 found 400.1289

#### Benzyl ((dibutoxyphosphoryl)(phenyl)methyl)carbamate (**3b**)

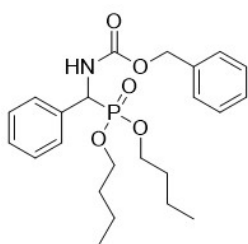

White solid; 905mg, 87% yield; mp: 104-106 °C.  $^1\text{H NMR}$  (400 MHz,  $\text{CDCl}_3$ )  $\delta$ : 7.41 (d,  $J = 7.4$  Hz, 2H), 7.37 – 7.23 (m, 8H), 5.89 (s, 1H, NH), 5.20 – 5.00 (m, 3H), 4.07 – 3.93 (m, 2H), 3.90 – 3.80 (m, 1H), 3.67 – 3.57 (m, 1H), 1.63 – 1.51 (m, 2H), 1.44 – 1.27 (m, 4H), 1.24 – 1.13 (m, 2H), 0.88 (t,  $J = 7.4$  Hz, 3H), 0.80 (t,  $J = 7.4$  Hz, 3H);  $^{13}\text{C NMR}$  (101 MHz,  $\text{CDCl}_3$ )  $\delta$ : 155.74 (d,  $J = 12.1$  Hz), 136.19, 135.41, 128.70 (d,  $J = 2.0$  Hz), 128.59, 128.33 – 128.14 (m), 127.97 (d,  $J = 5.8$  Hz), 67.35, 67.05 (d,  $J = 7.1$  Hz), 66.85 (d,  $J = 7.3$  Hz), 52.51 (d,  $J = 153.3$  Hz), 32.56 (d,  $J = 5.8$  Hz), 32.35 (d,  $J = 5.9$  Hz), 18.62 (d,  $J = 13.1$  Hz), 13.61 (d,  $J = 7.7$  Hz);  $^{31}\text{P NMR}$  (162 MHz,  $\text{CDCl}_3$ )  $\delta$ : 21.94. HRMS (ESI) calculated for  $\text{C}_{23}\text{H}_{32}\text{NO}_5\text{PNa}$   $[\text{M}^+\text{Na}]^+$ : 456.1916 found 456.1819.

### Benzyl ((diisopropoxyphosphoryl)(phenyl)methyl)carbamate (3c)

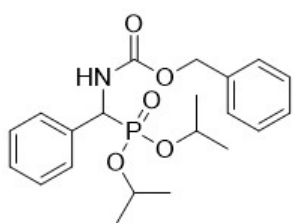

White solid; 919mg, 94% yield; mp: 102-103 °C.  $^1\text{H NMR}$  (400 MHz,  $\text{CDCl}_3$ )  $\delta$ : 7.41 (d,  $J = 7.5$  Hz, 2H), 7.35 – 7.24 (m, 8H), 5.85 (s, 1H NH), 5.17 – 4.99 (m, 3H), 4.70 – 4.59 (m, 1H), 4.47 – 4.37 (m, 1H), 1.28 (d,  $J = 6.2$  Hz, 3H), 1.21 (d,  $J = 6.2$  Hz, 3H), 1.18 (d,  $J = 6.2$  Hz, 3H), 0.89 (d,  $J = 6.2$  Hz, 3H);  $^{13}\text{C NMR}$  (101 MHz,  $\text{CDCl}_3$ )  $\delta$ : 155.80 (d,  $J = 9.5$  Hz), 128.27 (d,  $J = 3.8$  Hz), 128.18 – 128.05 (m), 72.31 (d,  $J = 7.2$  Hz), 71.87 (d,  $J = 7.4$  Hz), 67.31, 53.12 (d,  $J = 154.1$  Hz), 24.28 (d,  $J = 3.1$  Hz), 24.19 (d,  $J = 3.5$  Hz), 23.79 (d,  $J = 5.2$  Hz), 23.21 (d,  $J = 5.7$  Hz);  $^{31}\text{P NMR}$  (162 MHz,  $\text{CDCl}_3$ )  $\delta$ : 20.18. HRMS (ESI) calculated for  $\text{C}_{21}\text{H}_{28}\text{NO}_5\text{PNa}$   $[\text{M}^+\text{Na}]^+$ : 428.1603 found 428.1613.

### Benzyl ((bis(benzyloxy)phosphoryl)(phenyl)methyl)carbamate (3d)

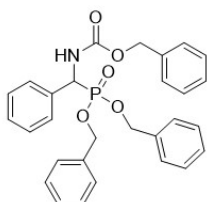

White solid; 1101mg, 91% yield; mp: 124-125 °C.  $^1\text{H NMR}$  (400 MHz,  $\text{CDCl}_3$ )  $\delta$ : 7.49 - 7.20 (m, 18H), 7.09 (dd,  $J = 6.3, 2.8$  Hz, 2H), 6.02 (s, 1H, NH), 5.27 (dd,  $J = 21.8, 9.6$  Hz, 1H), 5.12 – 4.92 (m, 4H), 4.83 (dd,  $J = 11.7, 7.2$  Hz, 1H), 4.60 (dd,  $J = 11.6, 8.5$  Hz, 1H);  $^{13}\text{C NMR}$  (101 MHz,  $\text{CDCl}_3$ )  $\delta$ : 155.73 (d,  $J = 11.3$  Hz), 136.14, 135.78, 135.03, 128.81 (d,  $J = 2.1$  Hz), 128.68 – 128.00 (m), 127.95, 68.67 (d,  $J = 6.7$  Hz), 68.52 (d,  $J = 7.1$  Hz), 67.40, 52.77 (d,  $J = 154.1$  Hz);  $^{31}\text{P NMR}$  (162 MHz,  $\text{CDCl}_3$ )  $\delta$ : 22.89. HRMS (ESI) calculated for  $\text{C}_{29}\text{H}_{28}\text{NO}_5\text{PNa}$   $[\text{M}^+\text{Na}]^+$ : 524.1603 found 524.1605

### Benzyl ((4-chlorophenyl)(diethoxyphosphoryl)methyl)carbamate (3e)

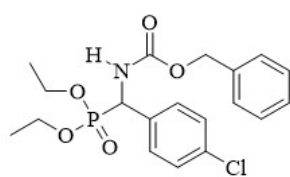

White solid; 938mg, 95% yield; mp: 116-117 °C.  $^1\text{H NMR}$  (400 MHz,  $\text{CDCl}_3$ )  $\delta$ : 7.39 – 7.24 (m, 9H), 5.98 (s, 1H, NH), 5.17 – 4.99 (m, 3H), 4.13 – 3.98 (m, 2H), 3.98 – 3.88 (m, 1H), 3.82 – 3.70 (m, 1H), 1.24 (t,  $J = 7.1$  Hz, 3H), 1.11 (t,  $J = 7.1$  Hz, 3H).  $^{13}\text{C NMR}$  (101 MHz,  $\text{CDCl}_3$ )  $\delta$ : 155.82 (d,  $J = 12.9$  Hz), 136.09, 134.19 (d,  $J = 3.3$  Hz), 134.01, 129.25 (d,  $J = 2.0$  Hz), 128.56, 128.24, 128.02 (d,  $J = 6.0$ ), 129.57 – 127.99 (m), 67.46 (s), 63.54 (d,  $J = 6.9$  Hz), 63.35 (d,  $J = 7.2$  Hz), 52.02



(d,  $J = 156.0$  Hz), 16.44 (d,  $J = 5.7$  Hz), 16.27 (d,  $J = 5.7$  Hz);  $^{31}\text{P}$  NMR (162 MHz,  $\text{CDCl}_3$ )  $\delta$ : 21.38 (s); HRMS (ESI) calculated for  $\text{C}_{19}\text{H}_{23}\text{ClNO}_5\text{PNa}$   $[\text{M}^+\text{Na}]^+$ : 434.0900 found 434.0899.

### Benzyl ((4-chlorophenyl)(dibutoxyphosphoryl)methyl)carbamate (3f)

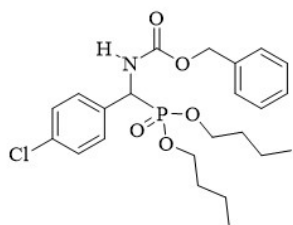

White solid; 921mg; 82% yield; mp: 95-96 °C.  $^1\text{H}$  NMR (400 MHz,  $\text{CDCl}_3$ )  $\delta$ : 7.39 – 7.23 (m 9H), 5.89 (brs, 1H), 5.16 – 5.01 (m, 3H), 4.06 – 3.94 (m, 2H), 3.92 – 3.83 (m, 1H), 3.73 – 3.64 (m, 1H), 1.61 – 1.52 (m, 2H), 1.47 – 1.39 (m, 2H), 1.37 – 1.27 (m, 2H), 1.26 – 1.16 (m, 2H), 0.88 (t,  $J = 7.4$  Hz, 3H), 0.82 (t,  $J = 7.4$  Hz, 3H);  $^{13}\text{C}$  NMR (101 MHz,  $\text{CDCl}_3$ )  $\delta$  155.74 (d,  $J = 12.4$  Hz), 136.06, 134.20, 129.32, 128.87, 128.62, 128.37, 128.22, 67.48, 67.13 (d,  $J = 7.1$  Hz), 67.03 (d,  $J = 7.5$  Hz), 51.98 (d,  $J = 156.2$  Hz), 32.54 (d,  $J = 5.8$  Hz), 32.37 (d,  $J = 5.8$  Hz), 18.68, 18.58, 13.63, 13.56;  $^{31}\text{P}$  NMR (162 MHz,  $\text{CDCl}_3$ )  $\delta$ : 21.35. HRMS (ESI) calculated for  $\text{C}_{23}\text{H}_{31}\text{ClNO}_5\text{PNa}$   $[\text{M}^+\text{Na}]^+$ : 490.1526 found 490.1534.

### Benzyl ((4-chlorophenyl)(diisopropoxyphosphoryl)methyl)carbamate (3g)

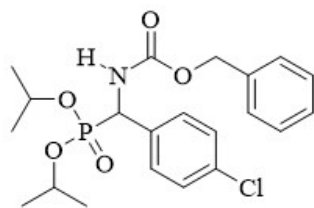

white solid; 938mg; 95% yield; mp: 132-134 °C.  $^1\text{H}$  NMR (400 MHz,  $\text{CDCl}_3$ )  $\delta$ : 7.45 – 7.14 (m, 9H), 5.91 (brs, 1H), 5.16 – 4.97 (m, 3H, CHP and  $\text{CH}_2\text{Ph}$ ), 4.69 – 4.59 (m, 1H), 4.52 – 4.42 (m, 1H), 1.28 (d,  $J = 6.2$  Hz, 3H), 1.23 (d,  $J = 6.2$  Hz, 3H), 1.18 (d,  $J = 6.2$  Hz, 3H), 0.96 (d,  $J = 6.2$  Hz, 3H).  $^{13}\text{C}$  NMR (101 MHz,  $\text{CDCl}_3$ )  $\delta$ : 155.83 (d,  $J = 9.6$  Hz), 136.15, 134.46, 134.02, 129.47, 128.71, 128.60, 128.35, 128.27, 72.39 (d,  $J = 7.2$  Hz), 72.12 (d,  $J = 7.4$  Hz), 67.42, 52.58 (d,  $J = 157.0$  Hz), 24.21 (d,  $J = 3.3$  Hz), 24.16 (d,  $J = 3.5$  Hz), 23.78 (d,  $J = 5.2$  Hz), 23.36 (d,  $J = 5.6$  Hz).  $^{31}\text{P}$  NMR (162 MHz,  $\text{CDCl}_3$ )  $\delta$ : 19.47; HRMS (ESI) calculated for  $\text{C}_{21}\text{H}_{27}\text{ClNO}_5\text{PNa}$   $[\text{M}^+\text{Na}]^+$ : 462.1213 found 462.1208.

### Benzyl ((bis(benzyloxy)phosphoryl)(4-chlorophenyl)methyl)carbamate (3h)

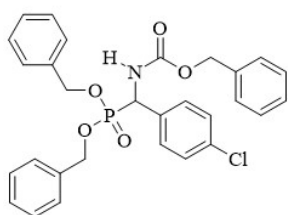

White solid; 1.221mg; 95% yield; mp: 148-150 °C.  $^1\text{H}$  NMR (400 MHz,  $\text{CDCl}_3$ )  $\delta$ : 7.35 – 7.20 (m, 17H), 7.10 (dd,  $J = 7.3, 1.9$  Hz, 2H), 5.94 (brs, 1H), 5.18 (dd,  $J = 22.2, 9.4$  Hz, 1H), 5.09 – 4.91 (m, 4H), 4.83 (dd,  $J = 11.7, 7.7$  Hz, 1H), 4.70 (dd,  $J = 11.6, 9.1$  Hz, 1H);  $^{13}\text{C}$  NMR (101 MHz, DMSO),  $\delta$ : 156.48 (d,  $J = 8.5$  Hz), 137.21, 136.78 (d,  $J = 14.4$  Hz), 135.08, 133.10, 130.65, 129.13 – 127.82 (m, aromatic carbon atoms), 68.17 (d,  $J = 6.9$  Hz), 67.91 (d,  $J = 6.6$  Hz), 66.56, 52.23 (d,  $J = 154.0$  Hz, );  $^{31}\text{P}$  NMR (162 MHz,  $\text{CDCl}_3$ )  $\delta$ : 22.38. HRMS (ESI) calculated for  $\text{C}_{29}\text{H}_{27}\text{ClNO}_5\text{PNa}$   $[\text{M}^+\text{Na}]^+$ : 558.1213 found 538.1221

### Benzyl ((diethoxyphosphoryl)(4-fluorophenyl)methyl)carbamate (3i)

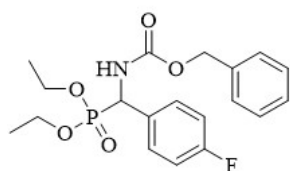

White solid; 808mg; 82% yield; mp: 124-126 °C. <sup>1</sup>H NMR (400 MHz, CDCl<sub>3</sub>) δ: 7.40 (brs, 2H), 7.31 (brs, 5H), 7.01 (t, *J* = 8.6 Hz, 2H), 6.05 (brs, 1H), 5.17 – 5.01 (m, 3H), 4.14 – 3.99 (m, 2H), 3.98 – 3.87 (m, 1H), 3.79 – 3.68 (m, 1H), 1.24 (t, *J* = 7.1 Hz, 3H), 1.09 (t, *J* = 7.1 Hz, 3H); <sup>13</sup>C NMR (101 MHz, CDCl<sub>3</sub>) δ: 155.82 (d, *J* = 11.1 Hz), 136.13, 131.30, 129.77, 128.59, 128.33, 128.22, 115.74 (d, *J* = 2.0 Hz), 115.53 (d, *J* = 2.0 Hz), 67.42, 63.48 (d, *J* = 6.9 Hz), 63.26 (d, *J* = 7.1 Hz), 51.90 (d, *J* = 155.6 Hz), 16.43 (d, *J* = 5.7 Hz), 16.25 (d, *J* = 5.7 Hz); <sup>31</sup>P NMR (162 MHz, CDCl<sub>3</sub>) δ: 21.66. HRMS (ESI) calculated for C<sub>19</sub>H<sub>23</sub>FNO<sub>5</sub>PNa [M<sup>+</sup>Na]<sup>+</sup>: 418.1196 found 418.1190

### Benzyl ((diethoxyphosphoryl)(p-tolyl)methyl)carbamate (3j)

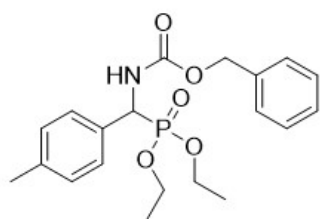

White solid; 771mg, 83% yield; mp: 115-117 °C. <sup>1</sup>H NMR (400 MHz, CDCl<sub>3</sub>) δ: 7.36 – 7.24 (m, 7H), 7.14 (d, *J* = 8.2 Hz, 2H), 5.74 (brs, 1H), 5.16 – 5.00 (m, 3H), 4.13 – 4.00 (m, 2H), 3.97 – 3.87 (m, 1H), 3.78 – 3.65 (m, 1H), 2.32 (s, 3H), 1.25 (t, *J* = 7.1 Hz, 3H), 1.10 (t, *J* = 7.1 Hz, 3H); <sup>13</sup>C NMR (101 MHz, CDCl<sub>3</sub>) δ: 155.75 (d, *J* = 11.0 Hz), 138.08, 136.22, 132.20, 129.43, 128.58, 128.28, 127.89, 67.33, 63.45 (d, *J* = 6.9 Hz), 63.16 (d, *J* = 7.1 Hz), 52.25 (d, *J* = 154.7 Hz), 21.25 (s), 16.45 (d, *J* = 5.8 Hz), 16.26 (d, *J* = 5.8 Hz); <sup>31</sup>P NMR (162 MHz, CDCl<sub>3</sub>) δ: 22.14. HRMS (ESI) calculated for C<sub>20</sub>H<sub>26</sub>NO<sub>5</sub>PNa [M<sup>+</sup>Na]<sup>+</sup>: 414.1446 found 414.1448

### Benzyl ((dibutoxyphosphoryl)(p-tolyl)methyl)carbamate (3k)

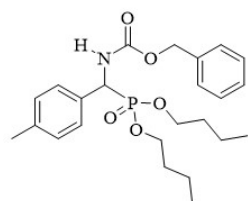

White solid; 835mg; 74% yield; mp: 108-110 °C. <sup>1</sup>H NMR (400 MHz, CDCl<sub>3</sub>) δ: 7.38 – 7.22 (m, 7H), 7.14 (d, *J* = 8.2 Hz, 2H), 5.77 (brs, 1H), 5.20 – 4.96 (m, 3H), 4.06 – 3.95 (m, 2H), 3.86 (1H), 3.69 – 3.58 (m, 1H), 2.32 (s, 3H), 1.64 – 1.53 (m, 2H), 1.46 – 1.28 (m, 4H), 1.26 – 1.14 (m, 2H), 0.88 (t, *J* = 7.4 Hz, 3H), 0.80 (t, *J* = 7.4 Hz, 3H); <sup>13</sup>C NMR (101 MHz, CDCl<sub>3</sub>) δ: 155.70 (d, *J* = 10.7 Hz), 138.03, 136.23, 132.33, 129.97 – 127.77 (m), 67.31, 67.04 (d, *J* = 7.1 Hz), 66.81 (d, *J* = 7.4 Hz), 52.20 (d, *J* = 154.7 Hz), 32.57 (d, *J* = 5.8 Hz), 32.37 (d, *J* = 5.8 Hz), 21.22, 18.64 (d, *J* = 11.8 Hz), 13.62 (d, *J* = 7.7 Hz); <sup>31</sup>P NMR (162 MHz, CDCl<sub>3</sub>) δ: 22.13. HRMS (ESI) calculated for C<sub>24</sub>H<sub>34</sub>NO<sub>5</sub>PNa [M<sup>+</sup>Na]<sup>+</sup>: 470.2072 found 470.2079

### Benzyl ((diisopropoxyphosphoryl)(p-tolyl)methyl)carbamate (3l)

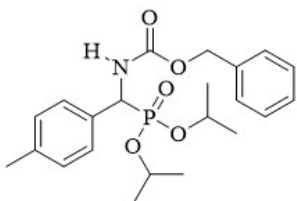

White solid; 812mg; 77% yield; mp: 126-128 °C. <sup>1</sup>H NMR (400 MHz, CDCl<sub>3</sub>) δ: 7.37 – 7.22 (m, 7H), 7.12 (d, *J* = 8.3 Hz, 2H), 5.77 (brs, 1H), 5.20 – 4.95 (m, 3H), 4.71 – 4.59 (m, 1H), 4.51 – 4.36 (m, 1H), 2.31 (s, 3H), 1.28 (d, *J* = 6.2 Hz, 3H), 1.22 (d, *J* = 6.2 Hz, 3H), 1.19 (d, *J* = 6.2 Hz, 3H), 0.92 (d, *J* = 6.2 Hz, 3H); <sup>13</sup>C NMR (101 MHz, CDCl<sub>3</sub>) δ: 155.78 (d, *J* = 11.0 Hz), 137.85, 136.30, 132.68, 130.19 – 127.62 (m), 72.21 (d, *J* = 7.2 Hz), 71.80 (d, *J* = 7.5 Hz), 67.24, 52.82

(d,  $J = 156.8$  Hz), 24.29 (d,  $J = 3.1$  Hz), 24.19 (d,  $J = 3.4$  Hz), 23.80 (d,  $J = 5.3$  Hz), 23.27 (d,  $J = 5.7$  Hz), 21.23;  $^{31}\text{P}$  NMR (162 MHz,  $\text{CDCl}_3$ ),  $\delta$ : 20.35. HRMS (ESI) calculated for  $\text{C}_{22}\text{H}_{30}\text{NO}_5\text{PNa}$   $[\text{M}^+\text{Na}]^+$ : 442.1759 found 442.1758

### Benzyl ((bis(benzyloxy)phosphoryl)(p-tolyl)methyl)carbamate (3m)

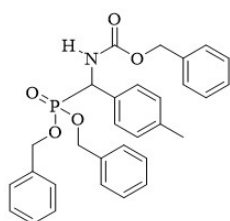

white solid; 1115mg; 91% yield; mp: 128-138 °C.  $^1\text{H}$  NMR (400 MHz,  $\text{CDCl}_3$ )  $\delta$ : 7.35 – 7.22 (m, 15H), 7.15 – 7.07 (m, 4H), 5.84 (brs, 1H), 5.21 (dd,  $J = 21.5$ , 9.6 Hz, 1H), 5.11 – 4.92 (m, 4H), 4.83 (dd,  $J = 11.7$ , 7.3 Hz, 1H), 4.62 (dd,  $J = 11.7$ , 8.5 Hz, 1H), 2.33 (s, 3H);  $^{13}\text{C}$  NMR (101 MHz,  $\text{CDCl}_3$ )  $\delta$ : 155.75 (d,  $J = 10.8$  Hz), 138.15, 136.33 – 135.70 (m), 132.00, 129.52, 128.84 – 127.69 (m, aromatic carbon atom), 68.64 (d,  $J = 6.9$  Hz), 68.47 (d,  $J = 7.2$  Hz), 52.50 (d,  $J = 155.7$  Hz), 21.27;  $^{31}\text{P}$  NMR (162 MHz,  $\text{CDCl}_3$ )  $\delta$ : 23.08. HRMS (ESI) calculated for  $\text{C}_{30}\text{H}_{30}\text{NO}_5\text{PNa}$   $[\text{M}^+\text{Na}]^+$ : 538.1759 found 538.1765

### Benzyl ((diethoxyphosphoryl)(pyridin-2-yl)methyl)carbamate (3n)

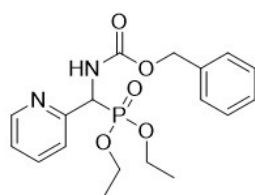

white solid; 790mg, 87% yield, mp: 110-112 °C.  $^1\text{H}$  NMR (400 MHz,  $\text{DMSO-d}_6$ )  $\delta$ : 8.48 (d,  $J = 4.7$  Hz, 1H), 8.21 (d,  $J = 9.8$  Hz, 1H), 7.77 (t,  $J = 7.7$  Hz, 1H), 7.56 (d,  $J = 7.9$  Hz, 1H), 7.37 – 7.24 (m, 5H), 5.25 (dd,  $J = 21.7$ , 10.0 Hz, 1H), 5.10-4.98 (m, 2H), 4.02 – 3.79 (m, 4H), 1.12 (t,  $J = 7.0$  Hz, 3H), 1.06 (t,  $J = 7.0$  Hz, 3H);  $^{13}\text{C}$  NMR (101 MHz,  $\text{DMSO-d}_6$ )  $\delta$ : 170.86, 167.53, 156.42 (d,  $J = 8.0$  Hz), 155.71, 149.18, 137.33, 132.26, 128.85, 128.39, 128.28, 123.47 (d,  $J = 2.4$  Hz), 123.33 (d,  $J = 3.9$  Hz), 66.48, 63.07 (d,  $J = 6.8$  Hz), 62.91 (d,  $J = 6.7$  Hz), 54.91 (d,  $J = 148.0$  Hz), 16.69 (d,  $J = 5.5$  Hz), 16.56 (d,  $J = 5.6$  Hz);  $^{31}\text{P}$  NMR (162 MHz,  $\text{DMSO-d}_6$ )  $\delta$ : 20.97. HRMS (ESI) calculated for  $\text{C}_{19}\text{H}_{24}\text{NO}_5\text{PNa}$   $[\text{M}^+\text{Na}]^+$ : 401.1294 found 401.1291

### Benzyl (1-(diethoxyphosphoryl)propyl)carbamate (3o).

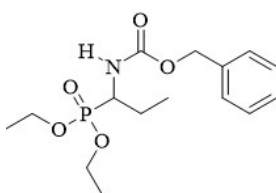

Colourless oil; 585mg, 62% yield.  $^1\text{H}$  NMR (400 MHz,  $\text{CDCl}_3$ )  $\delta$ : 7.65 – 7.06 (m, 5H), 5.17 – 5.02 (m, 3H), 4.14 – 3.91 (m, 4H), 1.94 – 1.84 (m, 1H), 1.63 – 1.51 (m, 1H), 1.25 (dt,  $J = 17.9$ , 7.1 Hz, 6H), 0.99 (t,  $J = 7.3$  Hz, 3H);  $^{13}\text{C}$  NMR (101 MHz,  $\text{CDCl}_3$ )  $\delta$ : 156.29 (d,  $J = 6.2$  Hz), 136.41 (s), 128.64 – 128.10 (m), 67.16 (s), 62.67 (d,  $J = 7.1$  Hz), 62.49 (d,  $J = 6.7$  Hz), 49.11 (d,  $J = 155.8$  Hz), 23.35 (s), 16.41 (s), 10.49 (s);  $^{31}\text{P}$  NMR (162 MHz,  $\text{CDCl}_3$ )  $\delta$ : 25.41 (s). HRMS (ESI) calculated for  $\text{C}_{15}\text{H}_{24}\text{NO}_5\text{PNa}$   $[\text{M}^+\text{Na}]^+$ : 352.1290 found 352.1286

### Benzyl (1-(diethoxyphosphoryl)-2-methylpropyl)carbamate (3p)

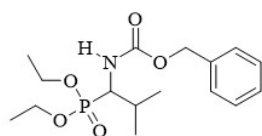

Yellowish oil; 588mg, 77% yield.  $^1\text{H NMR}$  (400 MHz,  $\text{CDCl}_3$ )  $\delta$  7.35 – 7.24 (m, 5H), 5.19 – 5.04 (m, 3H), 4.13 – 3.94 (m, 4H), 2.23 – 2.13 (m, 1H), 1.32 – 1.19 (m, 6H), 1.02 – 0.95 (m, 6H);  $^{13}\text{C NMR}$  (101 MHz,  $\text{CDCl}_3$ )  $\delta$  156.46 (d,  $J = 6.5$  Hz), 136.39 (s), 129.44 – 127.29 (m), 67.23 (s), 62.42 (m), 52.68 (d,  $J = 152.9$  Hz), 29.03 (d,  $J = 4.5$  Hz), 20.51 (d,  $J = 12.7$  Hz), 17.78 (d,  $J = 4.2$  Hz), 16.42 (d,  $J = 6.0$  Hz);  $^{31}\text{P NMR}$  (162 MHz,  $\text{CDCl}_3$ )  $\delta$  24.83 (s). HRMS (ESI) calculated for  $\text{C}_{16}\text{H}_{26}\text{NO}_5\text{PNa}$   $[\text{M}^+\text{Na}]^+$ : 366.1446 found 366.1450

### Benzyl (1-(bis(benzyloxy)phosphoryl)-2-methylpropyl)carbamate (3q)

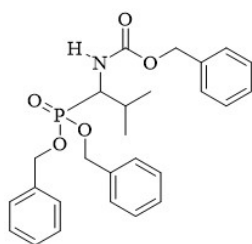

White solid; 728mg, 62% yield; mp: 82-84 °C.  $^1\text{H NMR}$  (400 MHz,  $\text{CDCl}_3$ )  $\delta$ : 7.37 – 7.21 (m, 15H), 5.13 – 5.03 (m, 3H), 5.02 – 4.92 (m, 4H), 4.19 – 4.06 (m, 1H), 2.26 – 2.15 (m, 1H), 1.04 – 0.93 (m, 6H);  $^{13}\text{C NMR}$  (101 MHz,  $\text{CDCl}_3$ )  $\delta$ : 156.40 (d,  $J = 6.5$  Hz), 136.35 – 136.05 (m), 128.74 – 128.02 (m), 67.85 (t,  $J = 6.8$  Hz), 67.29, 53.00 (d,  $J = 152.4$  Hz), 29.07 (d,  $J = 4.6$  Hz), 20.51 (d,  $J = 12.8$  Hz), 17.87 (d,  $J = 4.4$  Hz);  $^{31}\text{P NMR}$  (162 MHz,  $\text{CDCl}_3$ )  $\delta$ : 25.77. HRMS (ESI) calculated for  $\text{C}_{25}\text{H}_{30}\text{NO}_5\text{PNa}$   $[\text{M}^+\text{Na}]^+$ : 490.1759 found 490.1760.

### Benzyl (1-(diethoxyphosphoryl)-3-methylbutyl)carbamate (3r)

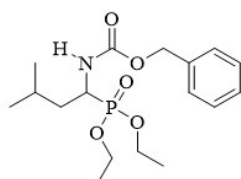

White solid; 497mg, 58% yield; 88-90 °C.  $^1\text{H NMR}$  (400 MHz,  $\text{CDCl}_3$ )  $\delta$  7.34 – 7.24 (m, 5H), 5.17 – 4.93 (m, 3H), 4.17 – 3.99 (m, 4H), 1.72 (m, 1H), 1.58 – 1.51 (m, 2H), 1.24 (dt,  $J = 19.6, 7.1$  Hz, 6H), 0.91 (d,  $J = 6.6$  Hz, 6H);  $^{13}\text{C NMR}$  (101 MHz,  $\text{CDCl}_3$ )  $\delta$  156.04 (d,  $J = 5.0$  Hz), 136.43 (s), 128.56 (s), 128.24 (s), 128.14 (s), 62.67 (d,  $J = 7.1$  Hz), 62.49 (d,  $J = 6.6$  Hz), 46.00 (d,  $J = 156.4$  Hz), 38.61 (s), 24.47 (d,  $J = 13.3$  Hz), 23.40 (s), 21.20 (s), 16.45 (dd,  $J = 5.8, 3.7$  Hz);  $^{31}\text{P NMR}$  (162 MHz,  $\text{CDCl}_3$ )  $\delta$  26.00 (s). HRMS (ESI) calculated for  $\text{C}_{17}\text{H}_{28}\text{NO}_5\text{PNa}$   $[\text{M}^+\text{Na}]^+$ : 380.1603 found 380.1603

## 5. Deprotection

The 20 mL of 4M aqueous HCl was added to a flask containing 0.5 g of **3a** or (*R,R,R*)-**6** and stirred at 100 °C for 4 h. The resulting mixture was then allowed to cool to room temperature and evaporated to dryness. The obtained crude product was purified by crystallization from  $\text{CHCl}_3$  to afford the free  $\alpha$ -aminophosphonic acids **7**.

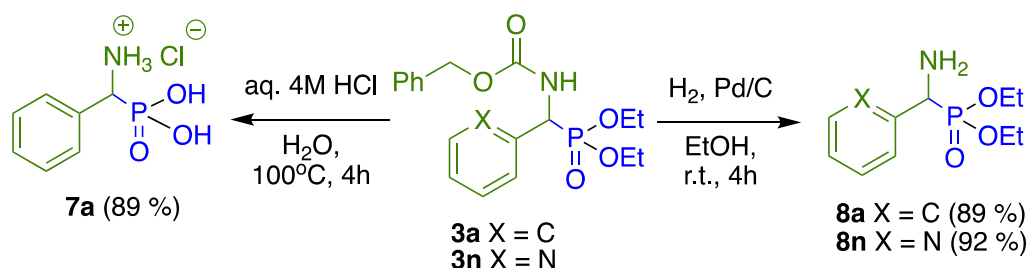

To obtain pure compound **8n**, a solution was prepared by dissolving 0.5 g of  $\alpha$ -aminophosphonate **3n** in 20 mL of ethanol, and then Pd/C was added to the solution. The mixture was stirred at room temperature under hydrogen gas for 4 hours, and then filtered through celite and concentrated. The resulting crude product was subjected to crystallization from Et<sub>2</sub>O.

#### Diethyl (amino(phenyl)methyl)phosphonate (**8a**)

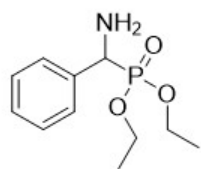

white solid; 264mg, 89% yield; mp: 226-228 °C; <sup>1</sup>H NMR (400 MHz, DMSO-d<sub>6</sub>)  $\delta$ : 7.38 (d,  $J$  = 8.9 Hz, 2H), 7.28 (t,  $J$  = 7.7 Hz, 2H), 7.24 – 7.19 (m, 1H), 4.17 (d,  $J$  = 18.1 Hz, 1H), 3.99 – 3.92 (m, 2H), 3.88 – 3.71 (m, 2H), 1.15 (t,  $J$  = 7.0 Hz, 3H), 1.04 (t,  $J$  = 7.1 Hz, 3H); <sup>13</sup>C NMR (101 MHz, DMSO-d<sub>6</sub>)  $\delta$ : 139.77 (d,  $J$  = 2.3 Hz), 128.38 (dd,  $J$  = 6.5, 4.2 Hz), 127.60 (d,  $J$  = 3.1 Hz), 62.54 (d,  $J$  = 7.0 Hz), 62.28 (d,  $J$  = 7.0 Hz), 53.70 (d,  $J$  = 147.8 Hz), 16.84 (d,  $J$  = 5.4 Hz), 16.68 (d,  $J$  = 5.4 Hz); <sup>31</sup>P NMR (162 MHz, DMSO-d<sub>6</sub>)  $\delta$ : 26.08.

#### Diethyl (amino(pyridin-2-yl)methyl)phosphonate (**8n**)

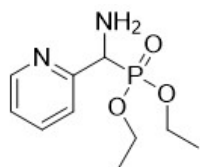

White solid, 178mg, 92% yield. <sup>1</sup>H NMR (400 MHz, CDCl<sub>3</sub>)  $\delta$ : 8.54 (d,  $J$  = 4.1 Hz, 1H), 7.63 (t,  $J$  = 7.7 Hz, 1H), 7.41 (d,  $J$  = 6.9 Hz, 1H), 7.17 (t,  $J$  = 5.3 Hz, 1H), 4.38 (d,  $J$  = 17.5 Hz, 1H), 4.08 – 3.93 (m, 4H), 1.24-1.19 (m, 6H); <sup>13</sup>C NMR (101 MHz, CDCl<sub>3</sub>)  $\delta$ : 156.32, 149.13, 136.40, 123.28 (d,  $J$  = 4.7 Hz), 122.70 (d,  $J$  = 3.1 Hz), 62.95 (d,  $J$  = 7.0 Hz), 62.80 (d,  $J$  = 7.1 Hz), 55.51 (d,  $J$  = 143.9 Hz), 16.47 (d,  $J$  = 3.0 Hz), 16.41 (d,  $J$  = 3.1 Hz); <sup>31</sup>P NMR (162 MHz, CDCl<sub>3</sub>)  $\delta$ : 24.51.

### 6. General procedure of the asymmetric hydrophosphonylation of $\alpha$ -amido sulphones.

In a 50 mL flask, TADDOL derived *H*-phosphonate (1 equiv.) was added to a solution of sulfone (1 equiv.) in THF (15 mL). After the resulting mixture had been cooled to -78°C, finely ground KOH (3 equiv.) was added in one portion to the mixture. The reaction mixture was stirred vigorously at the same temperature without any precaution to exclude air or moisture. After 4 days, saturated NH<sub>4</sub>Cl (ca. 15 mL) was added, and then the mixture was allowed to warm to room temperature. The organic layer was separated, and the aqueous layer was extracted thrice with toluene (ca. 15 mL). The combined organic extracts were dried over anhydrous MgSO<sub>4</sub>, filtered and the filtrate was concentrated to give the crude product. The concentrated crude product was then purified by column chromatography using CH<sub>2</sub>Cl<sub>2</sub> (100%) to CH<sub>2</sub>Cl<sub>2</sub>/MeOH 97:3 to afford the desired products **6**.

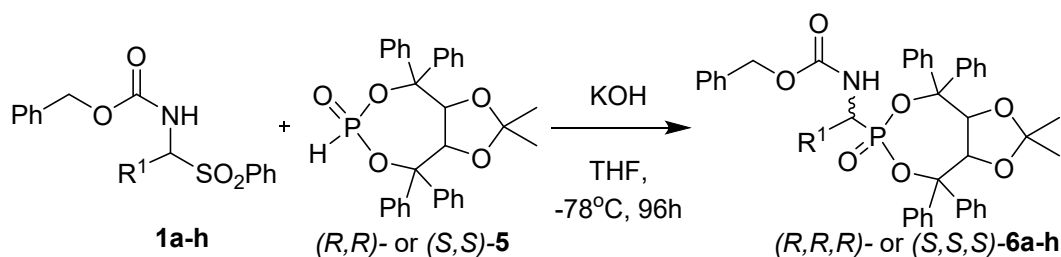

**Benzyl (((3*R*,8*aR*)-2,2-dimethyl-6-oxido-4,4,8,8-tetraphenyltetrahydro-[1,3]dioxolo[4,5-*e*][1,3,2]dioxaphosphepin-6-yl)(phenyl)methyl)carbamate (*R,R,R*)-6a**

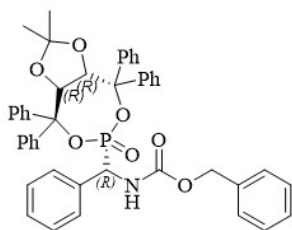

White solid; 187 mg, 85% yield; mp: 123-125°C;  $[\alpha]_D^{20} = -145.8$  ( $c = 1.0$ ,  $\text{CH}_2\text{Cl}_2$ );  $^1\text{H NMR}$  (400 MHz,  $\text{CDCl}_3$ ),  $\delta$ : 7.58 – 7.53 (m, 2H), 7.52 – 7.47 (m, 2H), 7.42 – 7.15 (m, 24H), 7.02 – 6.97 (m, 2H), 5.73 (br, s, 1H), 5.51 (d,  $J = 7.9$  Hz, 1H), 5.36 – 4.96 (m, 4H) 0.81 (s, 3H), 0.53 (s, 3H).  $^{13}\text{C NMR}$  (101 MHz,  $\text{CDCl}_3$ ),  $\delta$ : 155.70 (d,  $^1J_{\text{CO}} = 14.0$  Hz), 144.14, 143.31, 139.33 (d,  $J = 9.9$  Hz), 135.15, 129.82, 129.62, 128.63, 128.57, 128.54, 128.24, 128.12, 127.97, 127.91, 127.78, 127.40, 127.30, 126.62, 114.10, 90.93 (d,  $J = 12.6$  Hz), 87.39 (d,  $J = 8.2$  Hz), 79.94, 79.08, 67.40, 53.91 (d,  $^1J_{\text{CP}} = 161.2$  Hz), 27.02, 26.53;  $^{31}\text{P NMR}$  (162 MHz,  $\text{CDCl}_3$ )  $\delta$ : 15.07; **HRMS (ESI)** calculated for  $\text{C}_{46}\text{H}_{42}\text{NO}_7\text{PNa}$   $[\text{M}^+\text{Na}]^+$ : 774.2596 found 774.2600

**Benzyl (((3*S*,8*aS*)-2,2-dimethyl-6-oxido-4,4,8,8-tetraphenyltetrahydro-[1,3]dioxolo[4,5-*e*][1,3,2]dioxaphosphepin-6-yl)(phenyl)methyl)carbamate (*S,S,S*)-6a**

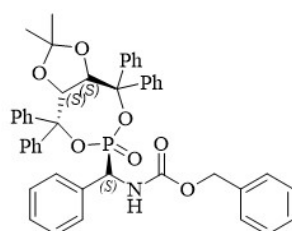

White solid; 194mg, 88% yield; mp: 124-126 °C ;  $[\alpha]_D^{20} = +171.0$  ( $c = 1.0$ ,  $\text{CH}_2\text{Cl}_2$ );  $^1\text{H NMR}$  (400 MHz,  $\text{CDCl}_3$ ),  $\delta$ : 7.58 – 7.53 (m, 2H), 7.52 – 7.44 (m, 2H), 7.42 – 7.13 (m, 24H), 7.03 – 6.96 (m, 2H), 5.70 (br, s, 1H), 5.51 (d,  $J = 7.9$  Hz), 5.36 – 4.96 (m, 4H), 0.80 (s, 3H), 0.53 (s, 3H);  $^{13}\text{C NMR}$  (101 MHz,  $\text{CDCl}_3$ ),  $\delta$ : 155.69 (d,  $^1J_{\text{CO}} = 12.6$  Hz), 144.22, 143.31, 139.34 (d,  $^2J_{\text{CP}} = 9.9$  Hz), 135.17, 129.63, 128.64, 128.62, 128.56, 128.54, 128.23, 128.12, 128.09, 127.90, 127.77, 127.39, 127.29, 126.61, 114.10, 90.94 (d,  $^2J_{\text{CP}} = 13.0$  Hz), 87.37 (d,  $^2J_{\text{CP}} = 9.7$  Hz), 79.91, 79.05, 67.39, 53.92 (d,  $^1J_{\text{CP}} = 161.9$  Hz), 27.01, 26.54;  $^{31}\text{P NMR}$  (162 MHz,  $\text{CDCl}_3$ )  $\delta$ : 15.05 **HRMS (ESI)** calculated for  $\text{C}_{46}\text{H}_{42}\text{NO}_7\text{PNa}$   $[\text{M}^+\text{Na}]^+$ : 774.2596 found 774.2594

**Benzyl(((3*R*,8*aR*)-2,2-dimethyl-6-oxido-4,4,8,8-tetraphenyltetrahydro-[1,3]dioxolo[4,5-*e*][1,3,2]dioxaphosphepin-6-yl)(4-fluorophenyl)methyl)-carbamate (*R,R,R*)-6b**

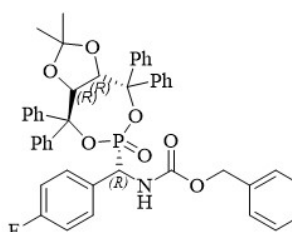

White solid; 210mg, 93% yield; mp: 174-176°C;  $[\alpha]_D^{20} = -139.2$  ( $c = 1.0$ ,  $\text{CH}_2\text{Cl}_2$ );  $^1\text{H NMR}$  (400 MHz,  $\text{CDCl}_3$ ),  $\delta$ : 7.54 – 7.48 (m, 2H), 7.47-7.41 (m, 2H), 7.38 – 7.12 (m, 21H), 7.03 – 6.88 (m, 4H), 5.64 (br, s, 1H), 5.49 (d,  $J = 7.6$ ), 5.33 – 4.89 (m, 4H), 0.76 (s, 3H), 0.50 (s, 3H);  $^{13}\text{C NMR}$  (101 MHz,  $\text{CDCl}_3$ ),  $\delta$ : 163.87 (d,  $J_{\text{CF}} = 3.1$  Hz), 161.41 (d,  $^1J_{\text{CO}} = 3.3$  Hz), 144.05 (d,  $^2J_{\text{CP}} = 6.2$  Hz), 143.14, 139.21 (d,  $^3J_{\text{CF}} = 9.9$  Hz), 131.11, 129.78, 129.57, 128.68, 128.64, 128, 56, 128.48, 128.36, 128.26, 128.17, 127.95, 127.87, 127.39, 127.30, 127.25, 126.60, 115.51 (d,  $^2J_{\text{CF}} = 21.7$  Hz), 114.22, 91.14 (d,  $^2J_{\text{CP}} = 11.7$  Hz), 87.57 (d,  $^2J_{\text{CP}} = 10.4$  Hz), 79.68, 78.93, 67.45, 53.21 (d,  $J_{\text{CP}} = 161.4$  Hz), 26.96, 26.52;  $^{31}\text{P NMR}$  (162 MHz,  $\text{CDCl}_3$ )  $\delta$  14.69; **HRMS (ESI)** calculated for  $\text{C}_{46}\text{H}_{41}\text{FNO}_7\text{PNa}$   $[\text{M}^+\text{Na}]^+$ : 792.2502 found 792.2498

**Benzyl (((3*S*,8*aS*)-2,2-dimethyl-6-oxido-4,4,8,8-tetraphenyltetrahydro-[1,3]dioxolo[4,5-*e*] [1,3,2]dioxaphosphepin-6-yl)(4-fluorophenyl)methyl)carbamate (*S,S,S*)-6b**

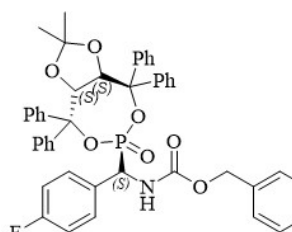

White solid; 205mg, 91% yield; mp:208-210 °C;  $[\alpha]_D^{20} = +169.2$  ( $c = 1.0$ ,  $\text{CH}_2\text{Cl}_2$ );  $^1\text{H NMR}$  (400 MHz,  $\text{CDCl}_3$ ),  $\delta$ : 7.56 – 7.51 (m, 2H), 7.49 – 7.43 (m, 2H), 7.41 – 7.15 (m, 21H), 7.01 – 6.91 (m, 2H), 5.70 (br, s 1H), 5.49 (d,  $J = 7.8$  Hz, 1H), 5.31 – 4.94 (m, 4H), 78, 0.52;  $^{13}\text{C NMR}$  (101 MHz,  $\text{CDCl}_3$ ),  $\delta$ : 163.87 (d,  $^1J_{\text{CF}} = 3.1$  Hz), 161.42 (d,  $^1J_{\text{CO}} = 3.1$  Hz), 155.68, 144.10 (d,  $^2J_{\text{CP}} = 6.2$  Hz), 143.16, 139.25 (d,  $^3J_{\text{CF}} = 9.9$  Hz), 131.12, 129.59, 128.68, 128.64, 128.57, 128.50, 128.36, 128.25, 127.94, 127.88, 127.40, 127.31, 127.26, 126.62, 115.50 (d,  $^2J_{\text{CF}} = 19.5$  Hz), 114.22, 91.15 (d,  $^2J_{\text{CP}} = 13.5$  Hz), 87.54 (d,  $^2J_{\text{CP}} = 9.0$  Hz), 79.77, 78.95, 67.45, 53.24 (d,  $^1J_{\text{CP}} = 167.8$  Hz), 26.98, 26.54; ;  $^{31}\text{P NMR}$  (162 MHz,  $\text{CDCl}_3$ )  $\delta$  14.65; **HRMS (ESI)** calculated for  $\text{C}_{46}\text{H}_{42}\text{NO}_7\text{PNa}$   $[\text{M}^+\text{Na}]^+$ : 792.2502 found 792.2498

**Benzyl((4-chlorophenyl)((3*R*,8*R*)-2,2-dimethyl-6-oxido-4,4,8-tetraphenyltetrahydro[1,3]dioxolo[4,5-*e*][1,3,2]dioxaphosphepin-6-yl)methyl)carbamate (*R,R,R*)- 6c**

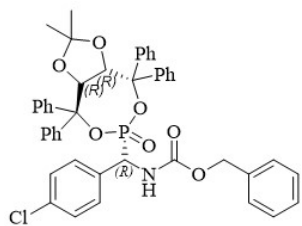

White solid; 219 mg, 95% yield; mp: 236-238 °C;  $[\alpha]_D^{20} = -135.5$  ( $c = 1.0$ ,  $\text{CH}_2\text{Cl}_2$ );  $^1\text{H NMR}$  (400 MHz,  $\text{CDCl}_3$ )  $\delta$ : 7.56 – 7.49 (m, 2H), 7.49 – 7.43 (m, 2H), 7.41 – 7.14 (m, 23H), 6.94 – 6.89 (m, 2H), 5.70 (s, br, 1H), 5.48 (d,  $J = 7.9$  Hz, 1H), 5.29 – 4.94 (m, 4H), 0.77 (s, 3H), 0.52 (s, 3H).  $^{13}\text{C NMR}$  (101 MHz,  $\text{CDCl}_3$ )  $\delta$ : 155.71 (d,  $^1J_{\text{CO}} = 14.1$  Hz), 144.06 (d,  $J_{\text{CCl}} = 6.2$  Hz), 143.11, 139.19 (d,  $^2J_{\text{CCl}} = 9.9$  Hz), 136.08, 134.03 (d,  $^2J_{\text{CP}} = 3.6$  Hz), 129.84, 129.62, 129.13, 128.73, 128.59, 128.50, 128.40, 128.28, 127.93 (d,  $^3J_{\text{CP}} = 6.2$  Hz), 127.40, 127.32, 126.61, 114.26, 92.02 (d,  $^1J_{\text{CP}} = 13.5$  Hz), 91.33 (d,  $^1J_{\text{CP}} = 12.7$  Hz), 79.66, 78.90, 67.49, 53.46 (d,  $J_{\text{CP}} = 161.5$  Hz), 26.98, 26.55;  $^{31}\text{P NMR}$  (162 MHz,  $\text{CDCl}_3$ )  $\delta$ : 14.51; **HRMS (ESI)** calculated for  $\text{C}_{46}\text{H}_{41}\text{ClNO}_7\text{PNa}$   $[\text{M}^+\text{Na}]^+$ : 808.2207 found 808.2220

**Benzyl (((3*R*,8*R*)-2,2-dimethyl-6-oxido-4,4,8-tetraphenyltetrahydro-[1,3]dioxolo[4,5-*e*][1,3,2]dioxaphosphepin-6-yl)(*p*-tolyl)methyl)carbamate (*R,R,R*)-6d**

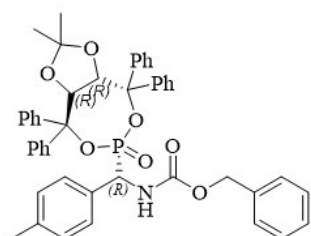

White solid; yield = 91%; mp; 128-130 °C;  $[\alpha]_D^{20} = -122.7$  ( $c = 1.0$ ,  $\text{CH}_2\text{Cl}_2$ );  $^1\text{H NMR}$  (400 MHz,  $\text{CDCl}_3$ )  $\delta$ : 7.58 – 7.52 (m, 2H), 7.50-7.45 (m, 2H), 7.40 – 7.14 (m, 21H), 7.09 (d,  $J = 8.2$  Hz, 2H), 7.01 (d,  $J = 6.9$  Hz, 2H), 5.65 (br, s, 1H), 5.50 (d,  $J = 7.9$  Hz, 1H), 5.37 – 4.97 (m, 4H), 2.35 (s, 3H), 0.80 (s, 3H), 0.53 (s, 3H);  $^{13}\text{C NMR}$  (101 MHz,  $\text{CDCl}_3$ )  $\delta$ : 155.62 (d,  $^1J_{\text{CO}} = 12.3$  Hz), 144.18 143.36, 139.38 (d,  $J = 9.9$  Hz), 137.80 132.12, 129.62, 129.31, 128.59, 128.51, 128.21, 127.88, 127.75, 127.37, 127.27 (d,  $^3J_{\text{CP}} = 4.5$  Hz), 126.63, 114.06, 90.80 (d,  $^2J_{\text{CP}} = 14.2$  Hz), 87.29 (d,  $^3J_{\text{CP}} = 9.2$  Hz), 79.96, 79.09, 67.33, 53.64 (d,  $^1J_{\text{CP}} = 165.6$  Hz), 27.01, 26.53, 21.28;  $^{31}\text{P NMR}$  (162 MHz,  $\text{CDCl}_3$ )  $\delta$ : 15.23; **HRMS (ESI)** calculated for  $\text{C}_{47}\text{H}_{44}\text{NO}_7\text{PNa}$   $[\text{M}^+\text{Na}]^+$ : 788.2753 found 788.2749

**Benzyl (((3*S*,8*S*)-2,2-dimethyl-6-oxido-4,4,8-tetraphenyltetrahydro-[1,3]dioxolo[4,5-*e*][1,3,2]dioxaphosphepin-6-yl)(*p*-tolyl)methyl)carbamate (*S,S,S*)-6d**

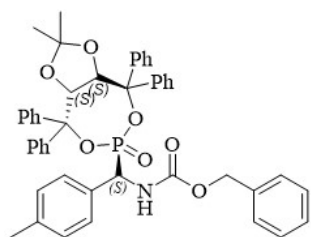

White solid; 208 mg, 93% yield; mp: 154-156 °C;  $[\alpha]_D^{20} = +142.2$  ( $c = 1.0$ ,  $\text{CH}_2\text{Cl}_2$ );  $^1\text{H NMR}$  (400 MHz,  $\text{CDCl}_3$ )  $\delta$ : 7.57 – 7.51 (m, 2H), 7.50-7.45 (m, 2H), 7.40 – 7.12 (m, 21H), 7.09 (d,  $J = 8.2$  Hz, 2H), 6.99 (d,  $J = 7.6$  Hz, 2H), 5.61 (br, s, 1H), 5.48 (d,  $J = 7.9$  Hz, 1H), 5.50 – 4.99, (m, 4H), 2.34 (s, 3H), 0.79 (s, 3H), 0.52 (s, 3H);  $^{13}\text{C NMR}$  (101 MHz,  $\text{CDCl}_3$ )  $\delta$ : 155.62 (d,  $^1J_{\text{CO}} = 12.4$  Hz), 144.16, 143.38, 139.37 (d,  $^2J_{\text{CP}} = 9.9$  Hz), 137.85, 132.11, 129.62, 129.28, 128.58, 128.50, 128.21, 127.87, 127.73, 127.36 127.26, 127.24, 126.61, 114.05, 90.82 (d,  $^2J_{\text{CP}} = 9.9$  Hz), 87.27 (d,  $^2J_{\text{CP}} = 7.9$  Hz), 79.93, 79.07, 67.33, 53.61 (d,  $^1J_{\text{CP}} = 162.8$  Hz), 27.00, 26.52, 21.26;  $^{31}\text{P NMR}$  (162 MHz,  $\text{CDCl}_3$ )  $\delta$ : 15.21; **HRMS (ESI)** calculated for  $\text{C}_{47}\text{H}_{44}\text{NO}_7\text{PNa}$   $[\text{M}^+\text{Na}]^+$ : 788.2753 found 788.2757

**Benzyl ((2,5-dimethoxyphenyl)((3*R*,8*R*)-2,2-dimethyl-6-oxido-4,4,8-tetraphenyltetrahydro-[1,3]dioxolo[4,5-*e*][1,3,2]dioxaphosphepin-6-yl)methyl)carbamate (*R,R,R*)-6e**

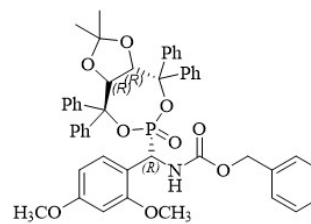

White solid; 212 mg, 89% yield; mp: 120-122 °C  $[\alpha]_D^{20} = -133.5$  ( $c = 1.0$ ,  $\text{CH}_2\text{Cl}_2$ );  $^1\text{H NMR}$  (400 MHz,  $\text{CDCl}_3$ )  $\delta$ : 7.57 – 7.52 (m, 2H), 7.50 – 7.46 (m, 2H), 7.38 – 7.15 (m, 19H), 7.07 – 7.03 (m, 2H), 6.95 – 6.84 (m, 2H), 6.79 (d,  $J = 6.7$  Hz, 1H), 5.68-5.58 (br, s, 1H), 5.51 (d,  $J = 8.0$  Hz), 5.30 – 4.93 (m, 4H), 3.86 (s, 3H), 3.69 (s, 3H), 0.82 (s, 3H), 0.52 (s, 3H);  $^{13}\text{C NMR}$  (101 MHz,  $\text{CDCl}_3$ )  $\delta$ : 155.63 (d,  $^1J_{\text{CO}} = 13.6$  Hz), 149.09 (d,  $^3J_{\text{CP}} = 2.0$  Hz), 149.03 (d,  $^3J_{\text{CP}} = 2.7$  Hz), 129.47, 128.63, 128.53, 128.47, 128.17, 127.90, 127.82, 127.42, 127.29, 127.14, 126.61, 120.57 (d,  $^2J_{\text{CP}} = 7.2$  Hz), 113.92, 111.08, 90.60 (d,  $^1J_{\text{CP}} = 11.7$  Hz), 87.21 (d,  $^1J_{\text{CP}} = 11.5$  Hz), 80.35, 79.09, 67.39, 56.01, 55.90, 53.50 (d,  $^1J_{\text{CP}} = 164.1$  Hz),

26.99, 26.47;  $^{31}\text{P}$  NMR (162 MHz,  $\text{CDCl}_3$ )  $\delta$ :15.29; **HRMS (ESI)** calculated for  $\text{C}_{48}\text{H}_{46}\text{NO}_9\text{PNa}$   $[\text{M}^+\text{Na}]^+$ : 834.2808 found 834.2809

**Benzyl (((3*R*,8*R*)-2,2-dimethyl-6-oxido-4,4,8,8-tetraphenyltetrahydro-[1,3]dioxolo[4,5-*e*][1,3,2]dioxaphosphepin-6-yl)(naphthalen-2-yl)methyl)carbamate (*R,R,R*)-6f**

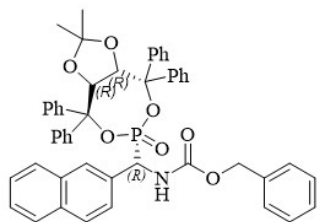

White solid; 211 mg, 90% yield; mp: 126-128 °C ;  $[\alpha]_{\text{D}}^{20} = -119.0$  ( $c = 1.0$ ,  $\text{CH}_2\text{Cl}_2$ );  $^1\text{H}$  NMR (400 MHz,  $\text{CDCl}_3$ )  $\delta$ : 7.83 (d,  $J = 5.7$  Hz, 1H), 7.75 (d,  $J = 8.5$  Hz, 1H), 7.71 – 7.60 (m, 2H), 7.58 – 7.07 (m, 24H), 7.06 – 6.91 (m, 2H), 6.82 (d,  $J = 7.9$  Hz, 2H), 5.77(s, br, 1H), 5.49 (d,  $J = 7.7$  Hz, 1H), 5.41 – 4.94 (m, 4H), 0.77 (s, 3H), 0.49 (s, 3H);  $^{13}\text{C}$  NMR (101 MHz,  $\text{CDCl}_3$ )  $\delta$ :155.76 (d,  $^1J_{\text{CO}} = 14.0$  Hz), 144.18, 143.23, 139.25, 133.20 (d,  $^2J_{\text{CP}} = 10.6$  Hz), 129.65, 128.61, 128.47, 128.24, 127.92, 127.70, 127.39, 127.16, 126.83, 126.60, 126.32, 125.58, 114.14, 91.15 (d,  $^2J_{\text{CP}} = 13.6$  Hz), 87.43 (d,  $^2J_{\text{CP}} = 8.9$  Hz), 79.77, 78.98, 67.46, 54.21 (d,  $^1J_{\text{CP}} = 162.9$  Hz), 26.98, 26.54;  $^{31}\text{P}$  NMR (162 MHz,  $\text{CDCl}_3$ )  $\delta$ :15.05; **HRMS (ESI)** calculated for  $\text{C}_{50}\text{H}_{44}\text{NO}_7\text{PNa}$   $[\text{M}^+\text{Na}]^+$ : 824.2753 found 824.2769

**Benzyl (1-((3*R*,8*R*)-2,2-dimethyl-6-oxido-4,4,8,8-tetraphenyltetrahydro-[1,3]dioxolo[4,5-*e*][1,3,2]dioxaphosphepin-6-yl)ethyl)carbamate (6g)**

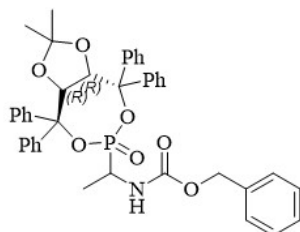

White solid; 131 mg, 65% yield; mp: 156-158 °C ;dr = 9:1;  $[\alpha]_{\text{D}}^{20} = -163.7$  ( $c = 1.0$ ,  $\text{CH}_2\text{Cl}_2$ );  $^1\text{H}$  NMR (400 MHz,  $\text{CDCl}_3$ )  $\delta$ : 7.60 – 7.46 (m, 4H), 7.45 – 7.13 (m, 21H), 5.54 (d,  $J = 7.9$  Hz, 1H), 5.35 – 4.93 (m, 4H), 4.34 – 4.18 (m, 1H), 1.38 (dd,  $J = 17.7, 7.3$  Hz, 3H), 0.77 (s, 3H), 0.58 (s, 3H); );  $^{13}\text{C}$  NMR (101 MHz,  $\text{CDCl}_3$ )  $\delta$ : 155.64 (d,  $^1J_{\text{CO}} = 6.4$  Hz), \*155.41 (d,  $^1J_{\text{CO}} = 8.8$  Hz), 144.44, 143.73, 143.38, 139.55, 136.24, 129.75, 128.84, 128.76, 128.64, 128.58, 128.39, 128.36, 128.28, 128.22, 128.12, 127.92, 127.83, 127.39, 127.33, 127.20, 127.08, 126.87, 126.65, \*114.4, 114.12, 90.87 (d,  $^2J_{\text{CP}} = 13.5$  Hz), 86.87 (d,  $^2J_{\text{CP}} = 8.8$  Hz), 79.68, 78.99, 67.19, \*67.02, 45.04 (d,  $^1J_{\text{CP}} = 167.66$  Hz), \*44.44 (d,  $^1J_{\text{CP}} = 166.65$  Hz), 26.94 (d,  $^2J_{\text{CP}} = 6.3$  Hz), \*26.66 (d,  $^2J_{\text{CP}} = 7.9$  Hz), 16.20, 15.71;  $^{31}\text{P}$  NMR (162 MHz,  $\text{CDCl}_3$ )  $\delta$ : 19.38, \*18.88; **HRMS (ESI)** calculated for  $\text{C}_{41}\text{H}_{40}\text{NO}_7\text{PNa}$   $[\text{M}^+\text{Na}]^+$ : 712.2440 found 721.2435

**Benzyl (1-((3*R*,8*R*)-2,2-dimethyl-6-oxido-4,4,8,8-tetraphenyltetrahydro-[1,3]dioxolo[4,5-*e*][1,3,2] dioxaphosphepin-6-yl)-3-methylbutyl)carbamate (6h)**

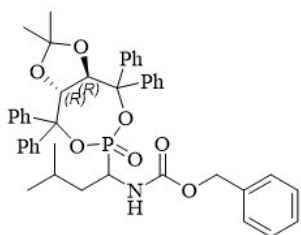

White solid; 161mg, 75% yield; mp: 114-116 °C ;dr = 1:9;  $[\alpha]_{\text{D}}^{20} = -153.8$  ( $c = 1.0$ ,  $\text{CH}_2\text{Cl}_2$ );  $^1\text{H}$  NMR (400 MHz,  $\text{CDCl}_3$ )  $\delta$ : 7.61 – 7.48 (m, 4H), 7.42 – 7.06 (m, 21H), 5.54 (d,  $J = 7.9$  Hz, 1H), 5.27 – 5.07 (m, 2H), 5.01 (d,  $J = 10.5$  Hz, 1H), 4.94 (d,  $J = 12.1$  Hz, 1H), 4.30 – 4.16 (m, 1H), 1.77 – 1.56 (m, 2H), 0.90 (d,  $J = 6.6$  Hz, 3H), 0.80 (d,  $J = 6.4$  Hz, 3H), 0.74 (s, 3H), 0.60 (s, 3H);  $^{13}\text{C}$  NMR (101 MHz,  $\text{CDCl}_3$ )  $\delta$ : 156.03 (d,  $^1J_{\text{CO}} = 4.3$  Hz), \*155.73 (d,  $^1J_{\text{CO}} = 5.1$  Hz), 144.69 (d,  $^3J_{\text{CP}} = 7.2$  Hz), \*144.52 (d,  $^3J_{\text{CP}} = 5.8$  Hz), 143.78, 139.56, 136.26, 129.82, 128.94, 128.73, 128.65, 128.60, 128.54, 128.44, 128.39, 128.35, 128.26, 128.17, 128.06, 127.77, 127.36, 127.32, 127.23, 126.95, 126.67, \*114.33, 114.16, 91.10 (d,  $^2J_{\text{CP}} = 13.8$  Hz), \*90.61 (d,  $^2J_{\text{CP}} = 14.1$  Hz), \*87.07 (d,  $^2J_{\text{CP}} = 9.1$  Hz), 86.80 (d,  $^2J_{\text{CP}} = 8.9$  Hz), \*80.21, 79.79, \*79.49, 78.93, 67.23, \*67.06, 47.97 (d,  $^1J_{\text{CP}} = 165.64$  Hz), \*47.31 (d,  $^1J_{\text{CP}} = 165.64$  Hz), \*38.36 (d,  $^2J_{\text{CP}} = 4.1$  Hz), 37.82 (d,  $^2J_{\text{CP}} = 3.4$  Hz), 26.94, \*26.72, 24.63, \*24.46, \*24.32, \*23.52, 23.48, \*21.27, 21.18;  $^{31}\text{P}$  NMR (162 MHz,  $\text{CDCl}_3$ )  $\delta$ : \*19.21, 18.90; **HRMS (ESI)** calculated for  $\text{C}_{44}\text{H}_{46}\text{NO}_7\text{PNa}$   $[\text{M}^+\text{Na}]^+$ : 754.2910 found 754.2913



## 7. General protocol for the cleavage of the chiral auxiliary and the iminic substituent

See section 5 for the procedure.

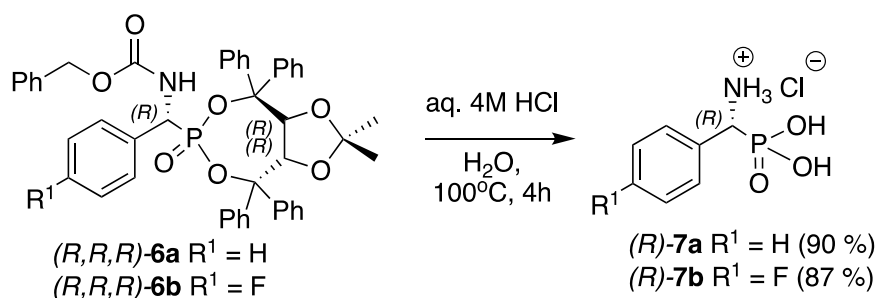

### (Amino(phenyl)methyl)phosphonic acid (**7a**)

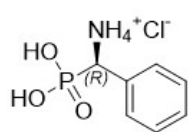

White solid; 90% yield; mp: 224-226 °C;  $[\alpha]_D^{20} = +19.0$  ( $c = 1.0$ , 1M NaOH);  $^1H$  NMR (400 MHz,  $D_2O$ )  $\delta$ : 7.25 (s, 5H), 4.29 (d,  $J = 16.4$  Hz);  $^{13}C$  NMR (101 MHz,  $D_2O$ )  $\delta$  132.00 (d,  $^2J_{CP} = 3.7$  Hz), 129.07, 129.05, 129.03, 53.01 (d,  $^1J_{CP} = 141.5$  Hz);  $^{31}P$  NMR (162 MHz,  $D_2O$ )  $\delta$ : 12.02

### (Amino(4-fluorophenyl)methyl)phosphonic acid (**7b**)

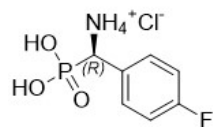

White solid; 87% yield; mp: 295-397 °C;  $[\alpha]_D^{20} = +10.4$  ( $c = 1.0$ , 1M NaOH);  $^1H$  NMR (400 MHz,  $D_2O$ )  $\delta$ : 7.32 (s, 2H), 7.12 – 7.01 (m, 2H), 4.33 (d,  $J = 16.0$  Hz, 1H);  $^{13}C$  NMR (151 MHz,  $D_2O$ )  $\delta$  162.72 (d,  $^1J_{CF} = 245.4$  Hz), 129.84, 129.10, 128.48, 127.09, 115.88 (d,  $^2J_{CP} = 21.9$  Hz), 52.69 (d,  $^1J_{CP} = 139.8$  Hz);  $^{31}P$  NMR (162 MHz,  $D_2O$ )  $\delta$ : 11.33.

## 8. X-Ray Analysis

Structures  $(R,R,R)$ -**6a** was measured on a Rigaku Oxford Diffraction XtaLAB Synergy-R DW diffractometer equipped with a HyPix ARC 150° Hybrid Photon Counting (HPC) detector using  $CuK_\alpha$  ( $\lambda = 1.54184 \text{ \AA}$ ). For structure  $(S,S,S)$ -**6d** an Xcalibur Gemini diffractometer equipped with Ruby CCD detector using  $CuK_\alpha$  ( $\lambda = 1.54184 \text{ \AA}$ ) was used. Data were processed using the CrystAlisPro software. The structures were solved by intrinsic phasing with SHELXT (2015 release) and refined by full-matrix least-squares methods based  $F^2$  using SHELXL. For all structures, H atoms bound to C atoms were placed in the geometrically idealized positions and treated in riding mode, with C-H = 0.95 Å and  $U_{iso}(H) = 1.2U_{eq}(C)$  for C-H groups, and C-H = 0.98 Å and  $U_{iso}(H) = 1.5U_{eq}(C)$  for  $CH_3$  groups.

CCDC 2248672 for  $(R,R,R)$ -**6a** and 2248673 for  $(S,S,S)$ -**6d** contain the supplementary crystallographic data for this paper. These data can be obtained free of charge via [www.ccdc.cam.ac.uk/data\\_request/cif](http://www.ccdc.cam.ac.uk/data_request/cif), or by emailing [data\\_request@ccdc.cam.ac.uk](mailto:data_request@ccdc.cam.ac.uk), or by contacting The Cambridge Crystallographic Data Centre, 12 Union Road, Cambridge CB2 1EZ, UK; fax: +44 1223 336033.

**Table S11:** Crystal data and structure refinement details

| Compound reference                                                            | ( <i>S,S,S</i> )- <b>6d</b>                           | ( <i>R,R,R</i> )- <b>6a</b>                       |
|-------------------------------------------------------------------------------|-------------------------------------------------------|---------------------------------------------------|
| Chemical formula                                                              | C <sub>47</sub> H <sub>44</sub> NO <sub>7</sub> P     | C <sub>46</sub> H <sub>42</sub> NO <sub>7</sub> P |
| Formula Mass                                                                  | 765.80                                                | 751.77                                            |
| Crystal system                                                                | orthorhombic                                          | monoclinic                                        |
| <i>a</i> [Å]                                                                  | 9.466(4)                                              | 10.768(3)                                         |
| <i>b</i> [Å]                                                                  | 16.073(6)                                             | 11.588(3)                                         |
| <i>c</i> [Å]                                                                  | 26.339(9)                                             | 31.149(7)                                         |
| $\beta$ [°]                                                                   |                                                       | 98.37(2)                                          |
| Unit cell volume/Å <sup>3</sup>                                               | 4007(3)                                               | 3845.4(17)                                        |
| Temperature/K                                                                 | 100(2)                                                | 100(2)                                            |
| Space group                                                                   | <i>P</i> 2 <sub>1</sub> 2 <sub>1</sub> 2 <sub>1</sub> | <i>P</i> 2                                        |
| No. of formula units per unit cell, <i>Z</i>                                  | 4                                                     | 4                                                 |
| Radiation type                                                                | CuK $\alpha$                                          | CuK $\alpha$                                      |
| Absorption coefficient, $\mu/\text{mm}^{-1}$                                  | 1.042                                                 | 1.076                                             |
| No. of reflections measured                                                   | 16956                                                 | 19844                                             |
| No. of independent reflections                                                | 7164                                                  | 19844                                             |
| <i>R</i> <sub>int</sub>                                                       | 0.0591                                                |                                                   |
| Final <i>R</i> <sub><i>I</i></sub> values ( <i>I</i> > 2σ( <i>I</i> ))        | 0.0527                                                | 0.0463                                            |
| Final <i>wR</i> ( <i>F</i> <sup>2</sup> ) values ( <i>I</i> > 2σ( <i>I</i> )) | 0.1346                                                | 0.1197                                            |
| Final <i>R</i> <sub><i>I</i></sub> values (all data)                          | 0.0634                                                | 0.0478                                            |
| Final <i>wR</i> ( <i>F</i> <sup>2</sup> ) values (all data)                   | 0.1463                                                | 0.1206                                            |
| Goodness of fit on <i>F</i> <sup>2</sup>                                      | 1.058                                                 | 1.112                                             |
| Flack parameter                                                               | -0.12(2)                                              | 0.044(18)                                         |

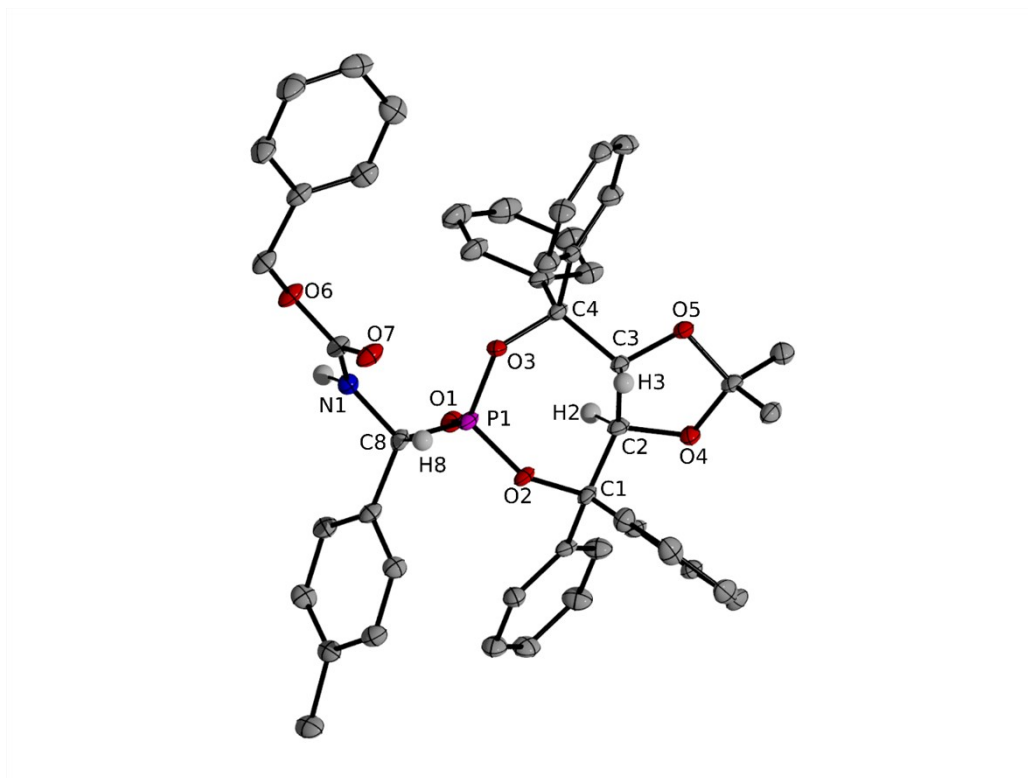

**Figure S11.** The molecular structure of compound (*S,S,S*)-**6d**, showing 30% probability displacement ellipsoids. The hydrogen atoms except H1, H2, H3 and H8 were omitted for clarity.

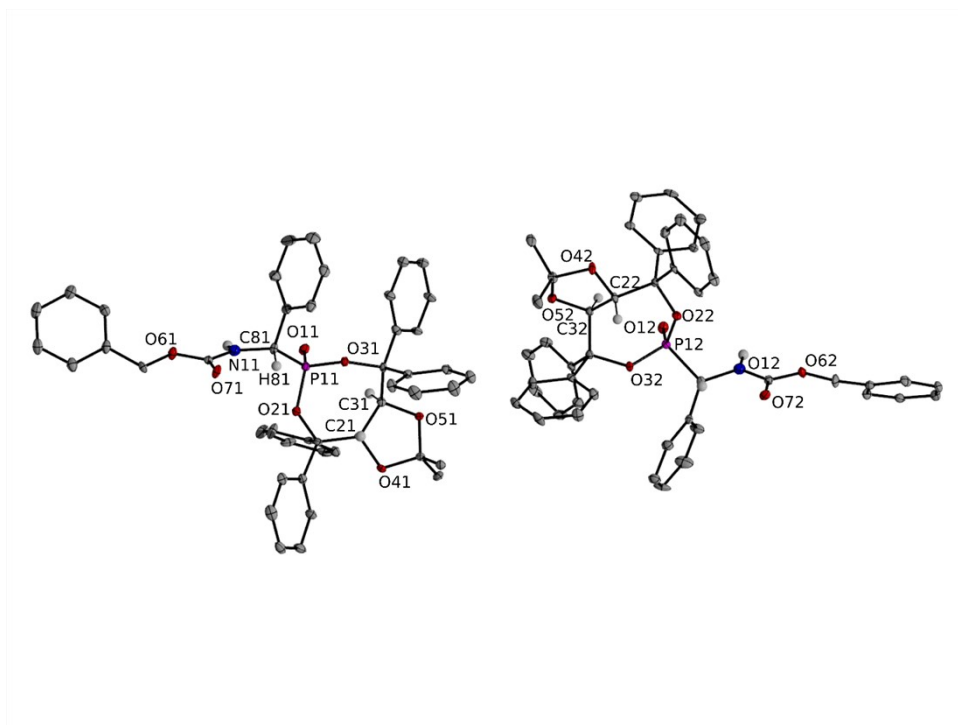

**Figure S12.** The molecular structure of compound (*R,R,R*)-**6a**, showing 30% probability displacement ellipsoids. The hydrogen atoms except H11, H12, H21, H22, H31, H32, H81 and H82 were omitted for clarity.

**Table SI2.** Selected bond distances and angles (Å, °) for (*S,S,S*)-**6d**.

|         |            |           |            |
|---------|------------|-----------|------------|
| P1—O1   | 1.459 (4)  | C24—C14   | 1.385 (8)  |
| P1—O2   | 1.578 (3)  | C24—C34   | 1.388 (8)  |
| P1—O3   | 1.595 (3)  | C21—C31   | 1.411 (8)  |
| P1—C8   | 1.817 (5)  | C55—C65   | 1.394 (7)  |
| O4—C2   | 1.431 (6)  | C55—C45   | 1.399 (8)  |
| O4—C5   | 1.433 (6)  | C32—C42   | 1.384 (8)  |
| O3—C4   | 1.443 (6)  | C45—C35   | 1.374 (8)  |
| O5—C3   | 1.413 (6)  | C210—C310 | 1.400 (9)  |
| O5—C5   | 1.439 (5)  | C14—C64   | 1.413 (8)  |
| O2—C1   | 1.457 (5)  | C34—C44   | 1.388 (9)  |
| O6—C9   | 1.353 (6)  | C62—C52   | 1.407 (8)  |
| O6—C10  | 1.448 (5)  | C12—C62   | 1.389 (7)  |
| O7—C9   | 1.225 (6)  | C12—C22   | 1.395 (7)  |
| N1—C9   | 1.344 (6)  | C0AA—C25  | 1.380 (8)  |
| N1—C8   | 1.453 (6)  | C0AA—C65  | 1.397 (8)  |
| C18—C28 | 1.370 (7)  | C22—C32   | 1.390 (7)  |
| C18—C68 | 1.392 (7)  | C110—C210 | 1.381 (8)  |
| C18—C8  | 1.527 (7)  | C110—C610 | 1.401 (7)  |
| C1—C11  | 1.519 (6)  | C110—C10  | 1.490 (8)  |
| C1—C12  | 1.529 (6)  | C25—C35   | 1.391 (7)  |
| C1—C2   | 1.552 (7)  | C28—C38   | 1.408 (8)  |
| C4—C14  | 1.535 (7)  | C68—C58   | 1.385 (8)  |
| C4—C0AA | 1.542 (6)  | C11—C61   | 1.388 (7)  |
| C4—C3   | 1.559 (6)  | C11—C21   | 1.400 (7)  |
| C3—C2   | 1.551 (6)  | C61—C51   | 1.378 (8)  |
| C5—C7   | 1.514 (8)  | C48—C38   | 1.387 (8)  |
| C5—C6   | 1.518 (7)  | C48—C58   | 1.394 (8)  |
| C48—C78 | 1.520 (7)  | C42—C52   | 1.372 (9)  |
| C41—C51 | 1.370 (10) | C610—C510 | 1.362 (9)  |
| C41—C31 | 1.383 (10) | C44—C54   | 1.391 (11) |
| C64—C54 | 1.389 (9)  | C310—C410 | 1.382 (10) |

|             |             |                |           |
|-------------|-------------|----------------|-----------|
| C410—C510   | 1.394 (11)  | C11—C21—C31    | 119.9 (5) |
| O1—P1—O2    | 115.46 (18) | N1—C8—C18      | 115.1 (4) |
| O1—P1—O3    | 115.6 (2)   | N1—C8—P1       | 110.6 (4) |
| O2—P1—O3    | 104.41 (18) | C18—C8—P1      | 110.3 (3) |
| O1—P1—C8    | 119.3 (2)   | C65—C55—C45    | 120.2 (5) |
| O2—P1—C8    | 98.9 (2)    | C42—C32—C22    | 120.2 (6) |
| O3—P1—C8    | 100.6 (2)   | O7—C9—N1       | 125.4 (4) |
| C2—O4—C5    | 109.8 (3)   | O7—C9—O6       | 124.0 (4) |
| C4—O3—P1    | 125.1 (3)   | N1—C9—O6       | 110.6 (4) |
| C3—O5—C5    | 106.6 (3)   | C28—C18—C68    | 119.3 (5) |
| C1—O2—P1    | 125.0 (3)   | C28—C18—C8     | 122.3 (4) |
| C9—O6—C10   | 115.3 (4)   | C68—C18—C8     | 118.3 (4) |
| C9—N1—C8    | 119.9 (4)   | C35—C45—C55    | 119.2 (5) |
| O2—C1—C11   | 105.3 (4)   | C110—C210—C310 | 120.4 (5) |
| O2—C1—C12   | 107.8 (4)   | C24—C14—C64    | 118.3 (5) |
| C11—C1—C12  | 110.8 (4)   | C24—C14—C4     | 125.1 (5) |
| O2—C1—C2    | 107.6 (3)   | C64—C14—C4     | 116.6 (5) |
| C11—C1—C2   | 112.0 (4)   | C0AA—C4—C3     | 107.7 (4) |
| C12—C1—C2   | 112.8 (4)   | O5—C3—C2       | 103.6 (4) |
| O3—C4—C14   | 110.0 (4)   | O5—C3—C4       | 110.5 (4) |
| O3—C4—C0AA  | 104.9 (4)   | C2—C3—C4       | 117.3 (4) |
| C14—C4—C0AA | 110.1 (4)   | O3—C4—C3       | 107.0 (4) |
| C14—C4—C3   | 116.4 (4)   | C44—C34—C24    | 120.6 (6) |
| O4—C5—O5    | 105.0 (4)   | C12—C62—C52    | 119.8 (5) |
| O4—C5—C7    | 108.3 (4)   | C52—C42—C32    | 119.6 (5) |
| O5—C5—C7    | 109.0 (4)   | C51—C41—C31    | 121.1 (5) |
| O4—C5—C6    | 111.9 (4)   | C54—C64—C14    | 119.9 (7) |
| O5—C5—C6    | 110.9 (4)   | C55—C65—C0AA   | 120.0 (5) |
| C7—C5—C6    | 111.5 (5)   | C45—C35—C25    | 120.9 (6) |
| C58—C68—C18 | 120.8 (5)   | C41—C51—C61    | 119.7 (6) |
| C61—C11—C21 | 118.5 (5)   | C41—C31—C21    | 119.1 (6) |
| C61—C11—C1  | 120.4 (4)   | C42—C52—C62    | 120.8 (5) |

|                  |            |                  |            |
|------------------|------------|------------------|------------|
| C21—C11—C1       | 121.1 (4)  | C510—C610—C110   | 121.0 (6)  |
| C51—C61—C11      | 121.5 (5)  | C34—C44—C54      | 118.7 (6)  |
| C38—C48—C58      | 118.9 (5)  | C64—C54—C44      | 121.2 (6)  |
| C38—C48—C78      | 121.0 (5)  | C410—C310—C210   | 120.3 (6)  |
| C58—C48—C78      | 120.1 (5)  | C310—C410—C510   | 119.0 (6)  |
| C62—C12—C22      | 118.8 (5)  | C62—C12—C1       | 122.0 (5)  |
| C18—C28—C38      | 120.4 (4)  | C22—C12—C1       | 119.3 (4)  |
| O6—C10—C110      | 114.2 (4)  | C25—C0AA—C65     | 119.4 (5)  |
| C14—C24—C34      | 121.3 (6)  | C25—C0AA—C4      | 120.8 (5)  |
| C610—C510—C410   | 120.7 (6)  | C65—C0AA—C4      | 119.7 (5)  |
| C48—C38—C28      | 120.4 (5)  | O4—C2—C3         | 103.6 (4)  |
| O1—P1—O3—C4      | -57.1 (4)  | O4—C2—C1         | 111.6 (4)  |
| O2—P1—O3—C4      | 70.8 (4)   | C3—C2—C1         | 114.7 (4)  |
| C8—P1—O3—C4      | 173.0 (3)  | C68—C58—C48      | 120.3 (5)  |
| O1—P1—O2—C1      | 40.2 (4)   | C32—C22—C12      | 120.9 (5)  |
| O3—P1—O2—C1      | -87.8 (4)  | C210—C110—C610   | 118.6 (5)  |
| C8—P1—O2—C1      | 168.7 (4)  | C210—C110—C10    | 124.9 (5)  |
| C8—N1—C9—O7      | -0.7 (8)   | C610—C110—C10    | 116.5 (5)  |
| C78—C48—C58—C68  | 177.6 (5)  | C0AA—C25—C35     | 120.3 (5)  |
| C62—C12—C22—C32  | 0.5 (7)    | C4—C0AA—C25—C35  | -178.5 (5) |
| C1—C12—C22—C32   | -179.2 (5) | C68—C18—C28—C38  | -0.2 (8)   |
| C65—C0AA—C25—C35 | -0.4 (7)   | C8—C18—C28—C38   | 174.7 (5)  |
| C8—N1—C9—O6      | 177.1 (5)  | C9—O6—C10—C110   | 97.8 (5)   |
| C10—O6—C9—O7     | -15.7 (8)  | C210—C110—C10—O6 | -20.4 (7)  |
| C10—O6—C9—N1     | 166.5 (4)  | C610—C110—C10—O6 | 161.1 (5)  |
| P1—O2—C1—C11     | 160.3 (3)  | C58—C48—C38—C28  | 2.7 (8)    |
| P1—O2—C1—C12     | -81.3 (4)  | C78—C48—C38—C28  | -177.0 (5) |
| P1—O2—C1—C2      | 40.6 (5)   | C18—C28—C38—C48  | -1.6 (8)   |
| P1—O3—C4—C14     | 72.9 (4)   | C61—C11—C21—C31  | 1.3 (8)    |
| P1—O3—C4—C0AA    | -168.6 (3) | C1—C11—C21—C31   | -179.5 (5) |
| P1—O3—C4—C3      | -54.4 (5)  | C9—N1—C8—C18     | 117.0 (5)  |
| C5—O5—C3—C2      | -33.2 (4)  | C9—N1—C8—P1      | -117.3 (5) |

|                 |            |                     |            |
|-----------------|------------|---------------------|------------|
| C5—O5—C3—C4     | -159.8 (4) | C28—C18—C8—N1       | 49.8 (6)   |
| O3—C4—C3—O5     | -172.9 (3) | C68—C18—C8—N1       | -135.2 (5) |
| C14—C4—C3—O5    | 63.6 (5)   | C28—C18—C8—P1       | -76.0 (5)  |
| C0AA—C4—C3—O5   | -60.5 (5)  | C68—C18—C8—P1       | 98.9 (5)   |
| O3—C4—C3—C2     | 68.7 (5)   | O1—P1—C8—N1         | -68.5 (4)  |
| C14—C4—C3—C2    | -54.8 (6)  | O2—P1—C8—N1         | 165.5 (3)  |
| C0AA—C4—C3—C2   | -179.0 (4) | O3—P1—C8—N1         | 58.9 (4)   |
| O2—C1—C12—C62   | 144.4 (4)  | O1—P1—C8—C18        | 59.8 (4)   |
| C2—O4—C5—O5     | -18.7 (5)  | O2—P1—C8—C18        | -66.1 (3)  |
| C2—O4—C5—C7     | -135.0 (4) | O3—P1—C8—C18        | -172.7 (3) |
| C2—O4—C5—C6     | 101.7 (4)  | C12—C22—C32—C42     | -0.4 (8)   |
| C3—O5—C5—O4     | 33.0 (5)   | C65—C55—C45—C35     | -0.2 (8)   |
| C3—O5—C5—C7     | 148.9 (4)  | C610—C110—C210—C310 | -1.1 (7)   |
| C3—O5—C5—C6     | -88.1 (5)  | C10—C110—C210—C310  | -179.6 (5) |
| C28—C18—C68—C58 | 0.7 (8)    | C34—C24—C14—C64     | -0.2 (8)   |
| C8—C18—C68—C58  | -174.4 (4) | C34—C24—C14—C4      | -177.0 (5) |
| O2—C1—C11—C61   | 162.3 (5)  | O3—C4—C14—C24       | -144.4 (5) |
| C12—C1—C11—C61  | 45.9 (7)   | C0AA—C4—C14—C24     | 100.4 (6)  |
| C2—C1—C11—C61   | -81.0 (6)  | C3—C4—C14—C24       | -22.4 (7)  |
| O2—C1—C11—C21   | -16.8 (6)  | O3—C4—C14—C64       | 38.8 (6)   |
| C12—C1—C11—C21  | -133.2 (5) | C0AA—C4—C14—C64     | -76.4 (6)  |
| C2—C1—C11—C21   | 99.9 (6)   | C3—C4—C14—C64       | 160.7 (5)  |
| C21—C11—C61—C51 | -1.8 (8)   | C14—C24—C34—C44     | 0.1 (10)   |
| C1—C11—C61—C51  | 179.0 (5)  | C22—C12—C62—C52     | -0.5 (7)   |
| C11—C1—C12—C62  | -100.8 (5) | C1—C12—C62—C52      | 179.2 (5)  |
| C2—C1—C12—C62   | 25.8 (6)   | C22—C32—C42—C52     | 0.2 (9)    |
| O2—C1—C12—C22   | -35.9 (5)  | C24—C14—C64—C54     | 0.2 (8)    |
| C11—C1—C12—C22  | 78.9 (5)   | C4—C14—C64—C54      | 177.3 (5)  |
| C2—C1—C12—C22   | -154.5 (4) | C45—C55—C65—C0AA    | 0.8 (8)    |
| O3—C4—C0AA—C25  | -158.6 (4) | C25—C0AA—C65—C55    | -0.5 (7)   |
| C14—C4—C0AA—C25 | -40.2 (6)  | C4—C0AA—C65—C55     | 177.6 (5)  |
| C3—C4—C0AA—C25  | 87.6 (5)   | C55—C45—C35—C25     | -0.8 (8)   |

|                 |            |                     |           |
|-----------------|------------|---------------------|-----------|
| O3—C4—C0AA—C65  | 23.3 (5)   | C0AA—C25—C35—C45    | 1.1 (8)   |
| C14—C4—C0AA—C65 | 141.7 (5)  | C31—C41—C51—C61     | -2.7 (10) |
| C3—C4—C0AA—C65  | -90.5 (5)  | C11—C61—C51—C41     | 2.5 (9)   |
| C5—O4—C2—C3     | -1.4 (5)   | C51—C41—C31—C21     | 2.2 (9)   |
| C5—O4—C2—C1     | -125.3 (4) | C11—C21—C31—C41     | -1.5 (9)  |
| O5—C3—C2—O4     | 21.1 (4)   | C32—C42—C52—C62     | -0.1 (9)  |
| C4—C3—C2—O4     | 143.2 (4)  | C12—C62—C52—C42     | 0.3 (9)   |
| O5—C3—C2—C1     | 143.0 (4)  | C210—C110—C610—C510 | 1.0 (9)   |
| C4—C3—C2—C1     | -94.9 (5)  | C10—C110—C610—C510  | 179.6 (6) |
| O2—C1—C2—O4     | 161.6 (3)  | C24—C34—C44—C54     | -0.1 (10) |
| C11—C1—C2—O4    | 46.3 (5)   | C14—C64—C54—C44     | -0.2 (10) |
| C12—C1—C2—O4    | -79.6 (5)  | C34—C44—C54—C64     | 0.1 (10)  |
| O2—C1—C2—C3     | 44.2 (5)   | C110—C210—C310—C410 | -0.2 (8)  |
| C11—C1—C2—C3    | -71.1 (5)  | C210—C310—C410—C510 | 1.5 (9)   |
| C12—C1—C2—C3    | 163.0 (4)  | C110—C610—C510—C410 | 0.3 (10)  |
| C18—C68—C58—C48 | 0.4 (8)    | C310—C410—C510—C610 | -1.6 (10) |
| C38—C48—C58—C68 | -2.1 (8)   |                     |           |

**Table SI2.** Selected bond distances and angles (Å, °) for (*R,R,R*)-**6a**.

|          |           |          |           |
|----------|-----------|----------|-----------|
| P11—O11  | 1.457 (4) | P12—O12  | 1.451 (4) |
| P11—O31  | 1.585 (4) | P12—O32  | 1.576 (4) |
| P11—O21  | 1.597 (4) | P12—O22  | 1.597 (4) |
| P11—C81  | 1.823 (5) | P12—C82  | 1.810 (5) |
| O21—C11  | 1.459 (6) | O22—C12  | 1.458 (6) |
| O31—C41  | 1.462 (6) | O32—C42  | 1.458 (6) |
| O41—C51  | 1.427 (6) | O42—C52  | 1.431 (6) |
| O41—C21  | 1.437 (6) | O42—C22  | 1.432 (6) |
| O51—C51  | 1.437 (7) | O52—C32  | 1.432 (5) |
| O51—C31  | 1.438 (6) | O52—C52  | 1.449 (6) |
| O61—C91  | 1.357 (6) | O62—C92  | 1.362 (6) |
| O61—C101 | 1.445 (6) | O62—C102 | 1.438 (6) |
| O71—C91  | 1.195 (7) | O72—C92  | 1.190 (6) |



|           |            |           |           |
|-----------|------------|-----------|-----------|
| N11—C91   | 1.362 (7)  | N12—C92   | 1.357 (7) |
| N11—C81   | 1.448 (7)  | N12—C82   | 1.471 (6) |
| C11—C111  | 1.529 (7)  | C12—C112  | 1.526 (7) |
| C11—C121  | 1.530 (7)  | C12—C122  | 1.547 (7) |
| C11—C21   | 1.536 (7)  | C12—C22   | 1.550 (7) |
| C21—C31   | 1.539 (7)  | C22—C32   | 1.555 (7) |
| C31—C41   | 1.545 (8)  | C32—C42   | 1.537 (7) |
| C41—C141  | 1.539 (7)  | C42—C142  | 1.524 (7) |
| C41—C151  | 1.541 (7)  | C42—C152  | 1.540 (7) |
| C51—C71   | 1.513 (8)  | C52—C72   | 1.510 (8) |
| C51—C61   | 1.515 (8)  | C52—C62   | 1.521 (8) |
| C81—C181  | 1.528 (8)  | C82—C182  | 1.516 (8) |
| C101—C110 | 1.496 (7)  | C102—C192 | 1.492 (7) |
| C111—C611 | 1.394 (7)  | C112—C612 | 1.388 (7) |
| C111—C211 | 1.402 (8)  | C112—C212 | 1.397 (7) |
| C211—C311 | 1.375 (9)  | C212—C312 | 1.372 (8) |
| C311—C411 | 1.361 (9)  | C312—C412 | 1.396 (8) |
| C411—C511 | 1.363 (9)  | C412—C512 | 1.378 (8) |
| C511—C611 | 1.409 (8)  | C512—C612 | 1.393 (7) |
| C121—C621 | 1.404 (8)  | C122—C222 | 1.388 (7) |
| C121—C221 | 1.406 (7)  | C122—C622 | 1.394 (8) |
| C221—C321 | 1.382 (9)  | C222—C322 | 1.410 (7) |
| C321—C421 | 1.395 (10) | C322—C422 | 1.370 (8) |
| C421—C521 | 1.382 (9)  | C422—C522 | 1.383 (8) |
| C521—C621 | 1.387 (8)  | C522—C622 | 1.405 (8) |
| C141—C641 | 1.390 (8)  | C142—C642 | 1.388 (8) |
| C141—C241 | 1.395 (7)  | C142—C242 | 1.398 (7) |
| C241—C341 | 1.388 (7)  | C242—C342 | 1.396 (8) |
| C341—C441 | 1.378 (8)  | C342—C442 | 1.370 (9) |
| C441—C541 | 1.404 (8)  | C442—C542 | 1.382 (8) |
| C541—C641 | 1.387 (8)  | C542—C642 | 1.385 (8) |
| C151—C251 | 1.377 (7)  | C152—C652 | 1.378 (7) |

|               |            |               |           |
|---------------|------------|---------------|-----------|
| C151—C651     | 1.388 (7)  | C152—C252     | 1.394 (7) |
| C251—C351     | 1.400 (8)  | C252—C352     | 1.381 (7) |
| C351—C451     | 1.398 (8)  | C352—C452     | 1.401 (8) |
| C451—C551     | 1.383 (9)  | C452—C552     | 1.375 (8) |
| C551—C651     | 1.384 (8)  | C552—C652     | 1.382 (8) |
| C181—C281     | 1.375 (8)  | C182—C682     | 1.392 (9) |
| C181—C681     | 1.388 (8)  | C182—C282     | 1.397 (8) |
| C281—C381     | 1.387 (9)  | C282—C382     | 1.380 (9) |
| C381—C481     | 1.382 (10) | C382—C482     | 1.365 (9) |
| C481—C581     | 1.360 (10) | C482—C582     | 1.398 (9) |
| C581—C681     | 1.395 (9)  | C582—C682     | 1.382 (9) |
| C110—C610     | 1.378 (8)  | C192—C692     | 1.390 (8) |
| C110—C210     | 1.389 (9)  | C192—C292     | 1.398 (8) |
| C210—C310     | 1.377 (8)  | C292—C392     | 1.378 (8) |
| C310—C410     | 1.396 (9)  | C392—C492     | 1.383 (8) |
| C410—C510     | 1.366 (10) | C492—C592     | 1.390 (8) |
| C510—C610     | 1.385 (8)  | C592—C692     | 1.382 (8) |
|               |            |               |           |
| O11—P11—O31   | 115.9 (2)  | O12—P12—O32   | 115.2 (2) |
| O11—P11—O21   | 115.8 (2)  | O12—P12—O22   | 116.0 (2) |
| O31—P11—O21   | 105.3 (2)  | O32—P12—O22   | 105.7 (2) |
| O11—P11—C81   | 118.6 (2)  | O12—P12—C82   | 118.4 (2) |
| O31—P11—C81   | 97.8 (2)   | O32—P12—C82   | 98.6 (2)  |
| O21—P11—C81   | 100.9 (2)  | O22—P12—C82   | 100.5 (2) |
| C11—O21—P11   | 126.6 (3)  | C12—O22—P12   | 126.4 (3) |
| C41—O31—P11   | 127.5 (3)  | C42—O32—P12   | 130.0 (3) |
| C51—O41—C21   | 107.7 (4)  | C52—O42—C22   | 108.5 (4) |
| C51—O51—C31   | 110.1 (4)  | C32—O52—C52   | 110.4 (4) |
| C91—O61—C101  | 114.0 (4)  | C92—O62—C102  | 114.0 (4) |
| C91—N11—C81   | 116.2 (4)  | C92—N12—C82   | 116.4 (4) |
| O21—C11—C111  | 108.4 (4)  | O22—C12—C112  | 109.0 (4) |
| O21—C11—C121  | 105.7 (4)  | O22—C12—C122  | 105.6 (4) |
| C111—C11—C121 | 110.0 (5)  | C112—C12—C122 | 109.8 (5) |

|                |           |                |           |
|----------------|-----------|----------------|-----------|
| O21—C11—C21    | 105.9 (4) | O22—C12—C22    | 105.1 (4) |
| C111—C11—C21   | 117.3 (4) | C112—C12—C22   | 118.7 (4) |
| C121—C11—C21   | 108.8 (4) | C122—C12—C22   | 107.8 (4) |
| O41—C21—C11    | 108.9 (5) | O42—C22—C12    | 110.5 (4) |
| O41—C21—C31    | 103.4 (4) | O42—C22—C32    | 102.9 (4) |
| C11—C21—C31    | 118.0 (4) | C12—C22—C32    | 116.7 (4) |
| O51—C31—C21    | 104.1 (4) | O52—C32—C42    | 110.8 (4) |
| O51—C31—C41    | 110.2 (4) | O52—C32—C22    | 104.2 (4) |
| C21—C31—C41    | 115.1 (4) | C42—C32—C22    | 114.8 (4) |
| O31—C41—C141   | 108.3 (4) | O32—C42—C142   | 107.9 (4) |
| O31—C41—C151   | 104.8 (4) | O32—C42—C32    | 106.8 (4) |
| C141—C41—C151  | 109.0 (4) | C142—C42—C32   | 113.8 (4) |
| O31—C41—C31    | 106.6 (4) | O32—C42—C152   | 104.3 (4) |
| C141—C41—C31   | 113.6 (4) | C142—C42—C152  | 109.1 (4) |
| C151—C41—C31   | 114.0 (4) | C32—C42—C152   | 114.3 (4) |
| O41—C51—O51    | 105.4 (4) | O42—C52—O52    | 104.4 (4) |
| O41—C51—C71    | 107.8 (5) | O42—C52—C72    | 108.0 (5) |
| O51—C51—C71    | 108.5 (5) | O52—C52—C72    | 109.0 (4) |
| O41—C51—C61    | 110.3 (5) | O42—C52—C62    | 110.9 (5) |
| O51—C51—C61    | 110.3 (5) | O52—C52—C62    | 111.4 (5) |
| C71—C51—C61    | 114.1 (5) | C72—C52—C62    | 112.8 (5) |
| N11—C81—C181   | 114.5 (4) | N12—C82—C182   | 114.3 (5) |
| N11—C81—P11    | 110.8 (4) | N12—C82—P12    | 111.2 (4) |
| C181—C81—P11   | 111.0 (4) | C182—C82—P12   | 112.0 (4) |
| O71—C91—O61    | 125.8 (5) | O72—C92—N12    | 124.9 (5) |
| O71—C91—N11    | 124.0 (5) | O72—C92—O62    | 126.2 (5) |
| O61—C91—N11    | 110.2 (5) | N12—C92—O62    | 108.8 (4) |
| O61—C101—C110  | 110.2 (4) | O62—C102—C192  | 110.4 (5) |
| C611—C111—C211 | 116.9 (5) | C612—C112—C212 | 118.3 (5) |
| C611—C111—C11  | 123.7 (5) | C612—C112—C12  | 123.9 (5) |
| C211—C111—C11  | 119.2 (5) | C212—C112—C12  | 117.8 (5) |
| C311—C211—C111 | 122.4 (6) | C312—C212—C112 | 121.5 (5) |

|                |           |                |           |
|----------------|-----------|----------------|-----------|
| C411—C311—C211 | 119.4 (6) | C212—C312—C412 | 120.1 (5) |
| C311—C411—C511 | 121.1 (6) | C512—C412—C312 | 118.6 (5) |
| C411—C511—C611 | 120.0 (5) | C412—C512—C612 | 121.4 (5) |
| C111—C611—C511 | 120.3 (5) | C112—C612—C512 | 119.9 (5) |
| C621—C121—C221 | 118.5 (5) | C222—C122—C622 | 120.1 (5) |
| C621—C121—C11  | 120.5 (5) | C222—C122—C12  | 120.6 (5) |
| C221—C121—C11  | 120.8 (5) | C622—C122—C12  | 119.3 (5) |
| C321—C221—C121 | 120.4 (6) | C122—C222—C322 | 118.8 (5) |
| C221—C321—C421 | 120.4 (6) | C422—C322—C222 | 120.9 (6) |
| C521—C421—C321 | 119.8 (6) | C322—C422—C522 | 120.6 (5) |
| C421—C521—C621 | 120.3 (6) | C422—C522—C622 | 119.2 (6) |
| C521—C621—C121 | 120.6 (6) | C122—C622—C522 | 120.3 (5) |
| C641—C141—C241 | 120.3 (5) | C642—C142—C242 | 118.8 (5) |
| C641—C141—C41  | 118.8 (5) | C642—C142—C42  | 119.5 (5) |
| C241—C141—C41  | 120.8 (5) | C242—C142—C42  | 121.6 (5) |
| C341—C241—C141 | 119.8 (5) | C342—C242—C142 | 120.2 (5) |
| C441—C341—C241 | 119.9 (5) | C442—C342—C242 | 120.0 (6) |
| C341—C441—C541 | 120.6 (6) | C342—C442—C542 | 120.2 (6) |
| C641—C541—C441 | 119.4 (6) | C442—C542—C642 | 120.2 (6) |
| C541—C641—C141 | 119.9 (5) | C542—C642—C142 | 120.5 (5) |
| C251—C151—C651 | 119.6 (5) | C652—C152—C252 | 119.0 (5) |
| C251—C151—C41  | 118.9 (5) | C652—C152—C42  | 121.8 (5) |
| C651—C151—C41  | 121.4 (5) | C252—C152—C42  | 119.1 (5) |
| C151—C251—C351 | 120.7 (5) | C352—C252—C152 | 120.2 (5) |
| C451—C351—C251 | 119.4 (6) | C252—C352—C452 | 119.7 (5) |
| C551—C451—C351 | 119.3 (6) | C552—C452—C352 | 120.3 (5) |
| C451—C551—C651 | 120.9 (6) | C452—C552—C652 | 119.2 (6) |
| C551—C651—C151 | 120.1 (5) | C152—C652—C552 | 121.6 (5) |
| C281—C181—C681 | 119.0 (6) | C682—C182—C282 | 117.8 (6) |
| C281—C181—C81  | 119.5 (5) | C682—C182—C82  | 122.4 (5) |
| C681—C181—C81  | 121.4 (5) | C282—C182—C82  | 119.8 (6) |
| C181—C281—C381 | 121.0 (6) | C382—C282—C182 | 121.3 (6) |

|                |           |                |           |
|----------------|-----------|----------------|-----------|
| C481—C381—C281 | 119.4 (6) | C482—C382—C282 | 119.9 (6) |
| C581—C481—C381 | 120.5 (7) | C382—C482—C582 | 120.6 (6) |
| C481—C581—C681 | 120.1 (7) | C682—C582—C482 | 118.9 (6) |
| C181—C681—C581 | 120.0 (6) | C582—C682—C182 | 121.5 (6) |
| C610—C110—C210 | 118.4 (5) | C692—C192—C292 | 118.9 (5) |
| C610—C110—C101 | 118.9 (6) | C692—C192—C102 | 118.5 (5) |
| C210—C110—C101 | 122.7 (5) | C292—C192—C102 | 122.5 (5) |
| C310—C210—C110 | 120.7 (6) | C392—C292—C192 | 119.8 (5) |
| C210—C310—C410 | 120.4 (7) | C292—C392—C492 | 121.3 (6) |
| C510—C410—C310 | 118.8 (6) | C392—C492—C592 | 119.1 (5) |
| C410—C510—C610 | 120.8 (6) | C692—C592—C492 | 120.1 (5) |
| C110—C610—C510 | 120.9 (7) | C592—C692—C192 | 120.8 (5) |

## 9. Chiroptical analysis - ECD Measurements.

ECD spectra were recorded in the 240–300 nm range with a Jasco J-1500 1500spectropolarimeter (Jasco Inc, USA). Before use, the optical chamber of the CD spectrometer was deoxygenated with dry nitrogen and was held under a nitrogen atmosphere during the measurements. All optical measurements were performed in quartz cell cuvettes with conventional path lengths of 10 mm. The sample solutions in  $\text{CH}_2\text{Cl}_2$  were of concentration  $1 \cdot 10^{-5}$  M.

**Figure SI3.** ECD spectra of measured for individual (*R,R,R*)-**6d** and (*S,S,S*)-**6d**.

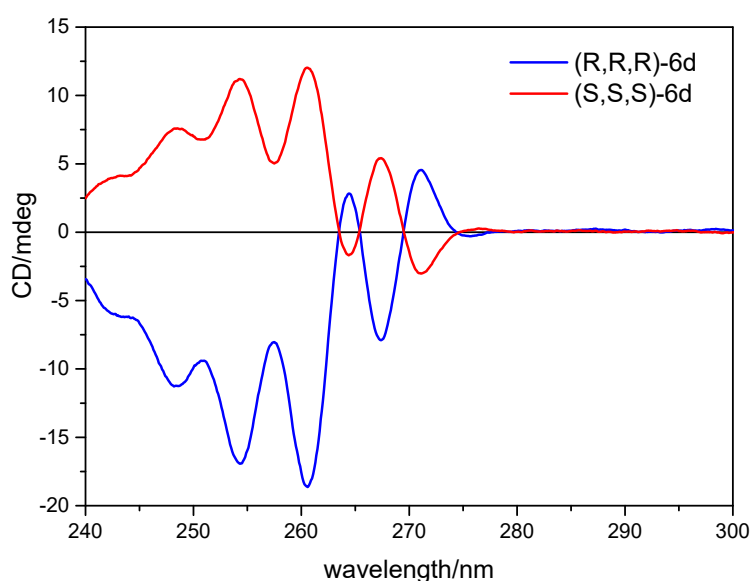

## 10. NMR spectra

<sup>1</sup>H NMR spectrum **1a**

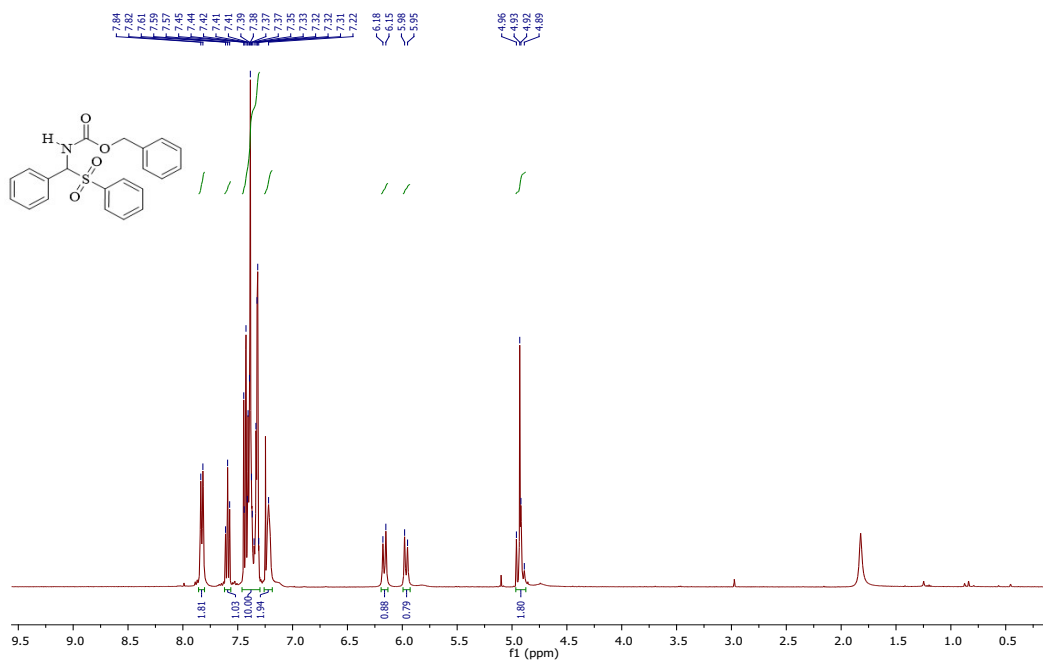

<sup>13</sup>C NMR spectrum **1a**

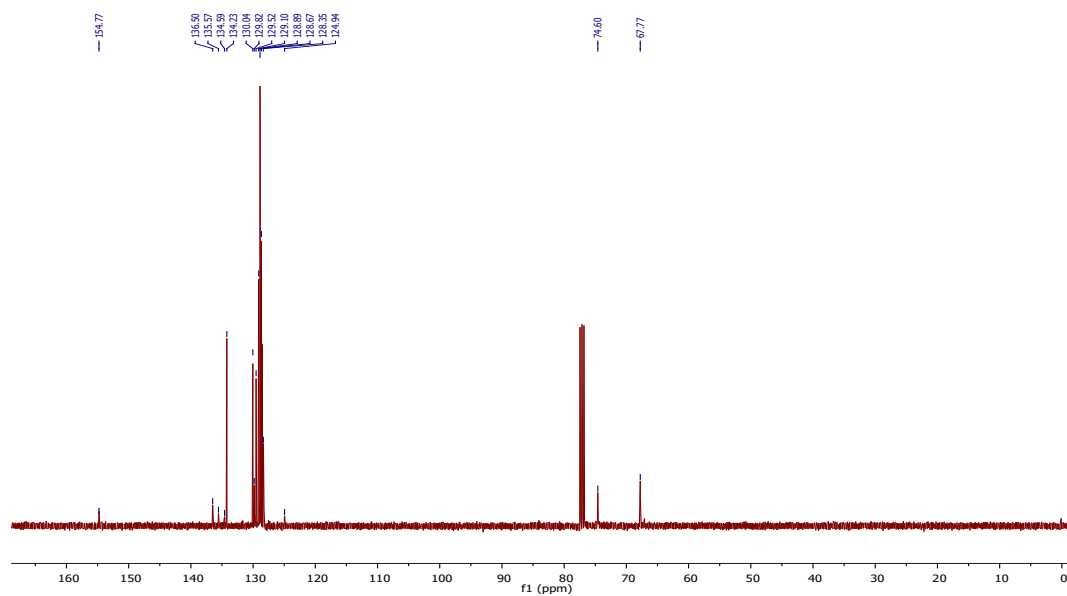

### <sup>1</sup>H NMR spectrum of **1b**

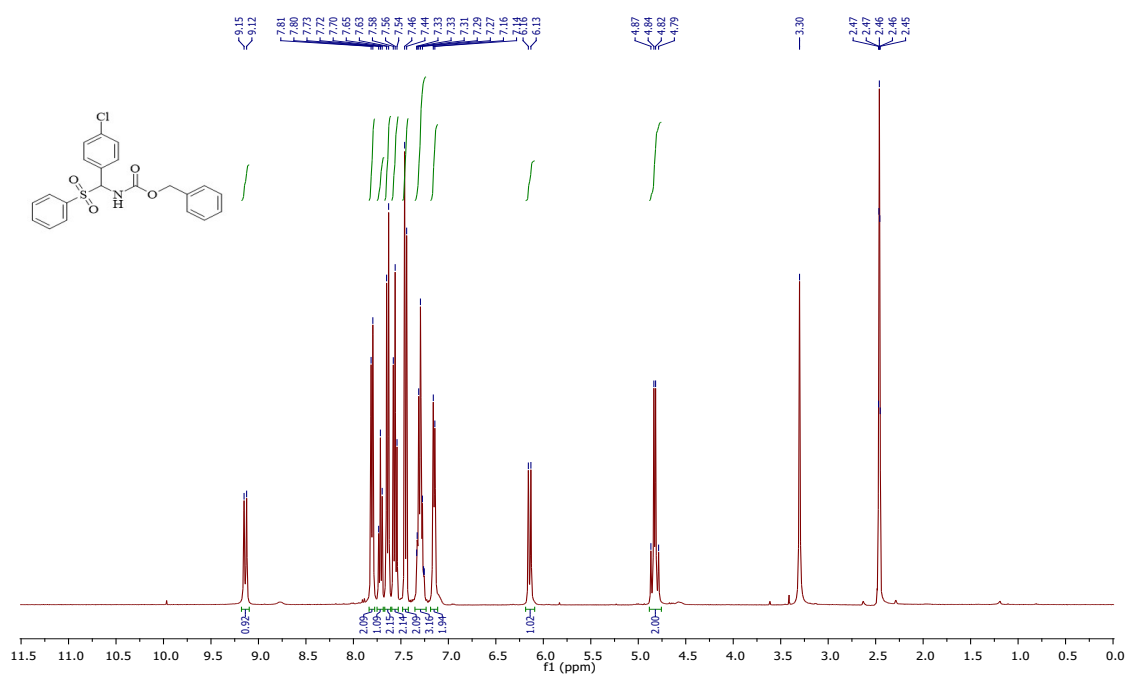

### <sup>13</sup>C NMR spectrum of **1b**

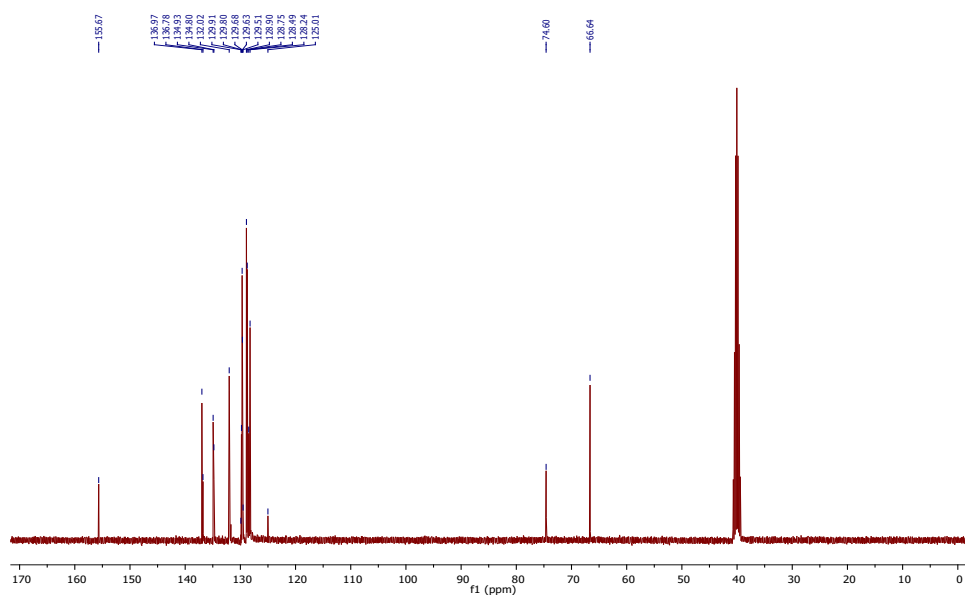

### <sup>1</sup>H NMR spectrum 1c

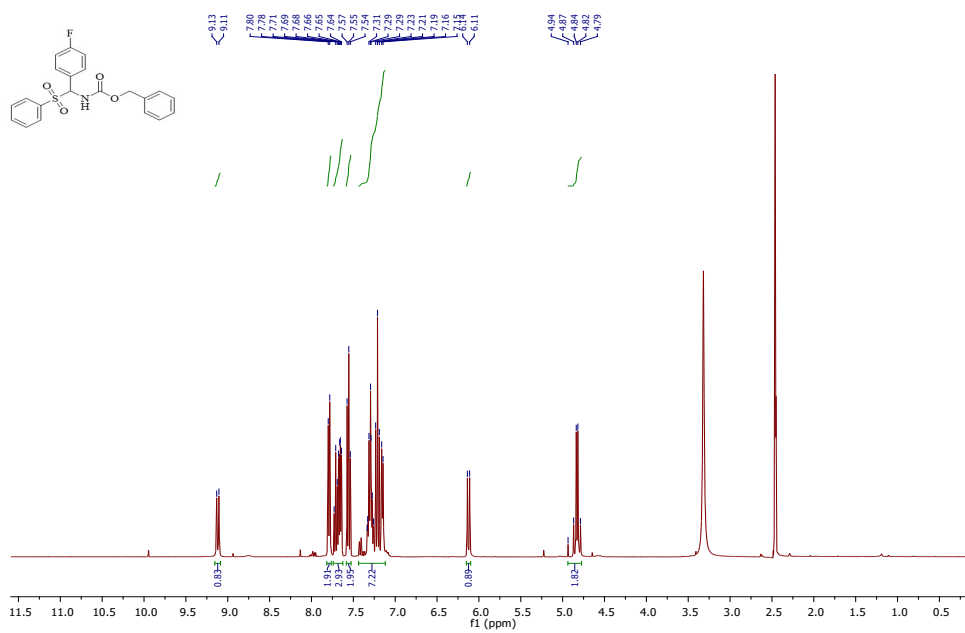

### <sup>13</sup>C NMR spectrum of 1c

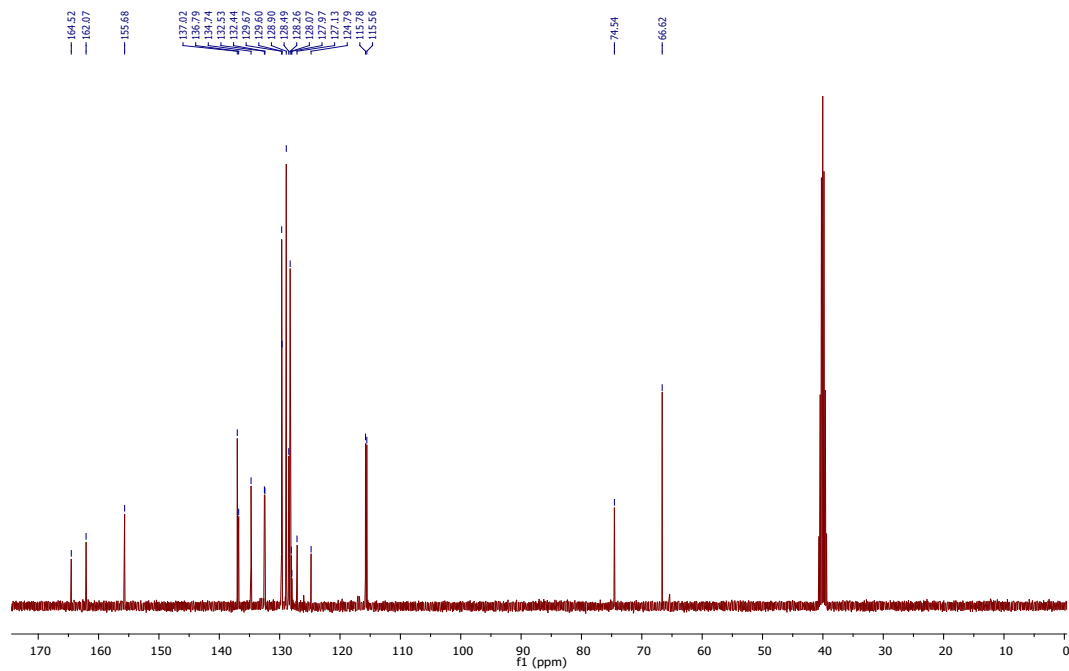



# <sup>1</sup>H NMR spectrum **1d**

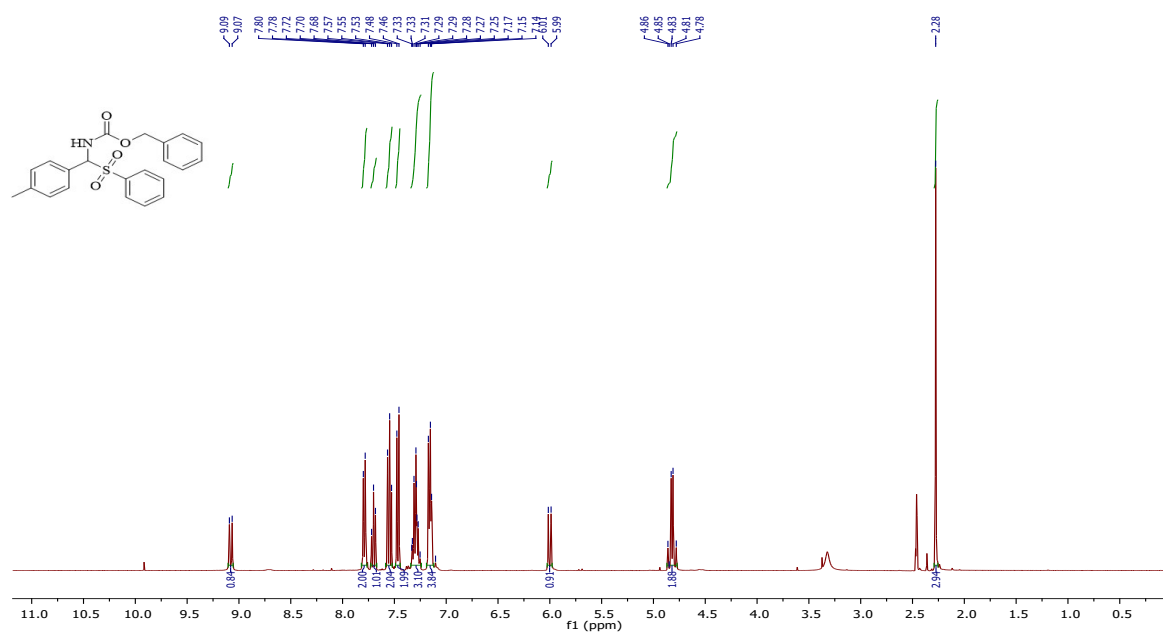

# <sup>13</sup>C NMR spectrum of **1d**

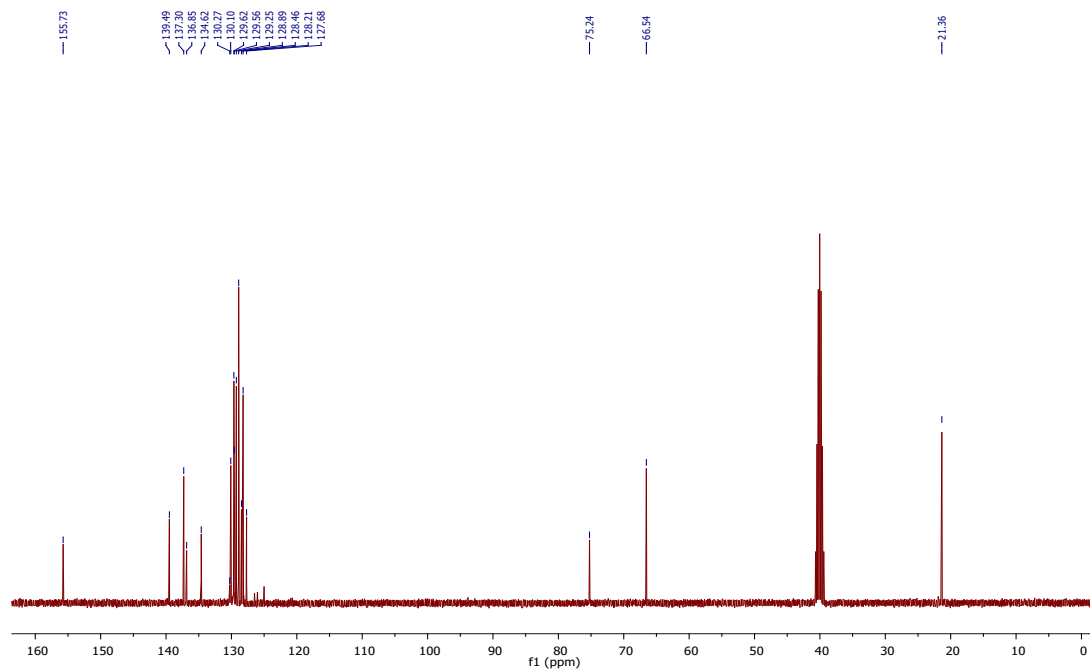

### <sup>1</sup>H NMR spectrum of **1e**

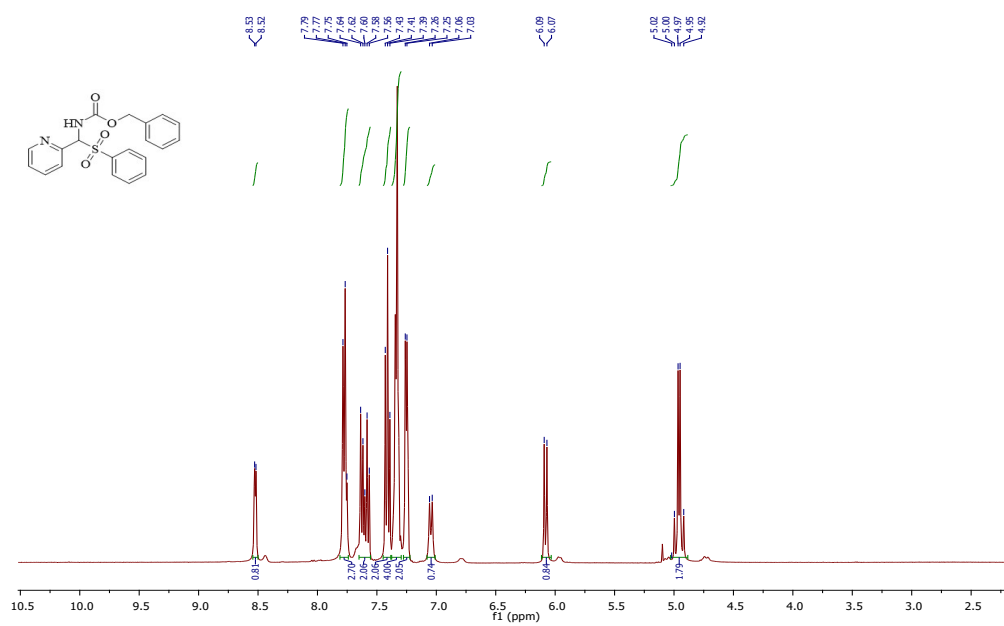

### <sup>13</sup>C NMR spectrum of **2e**

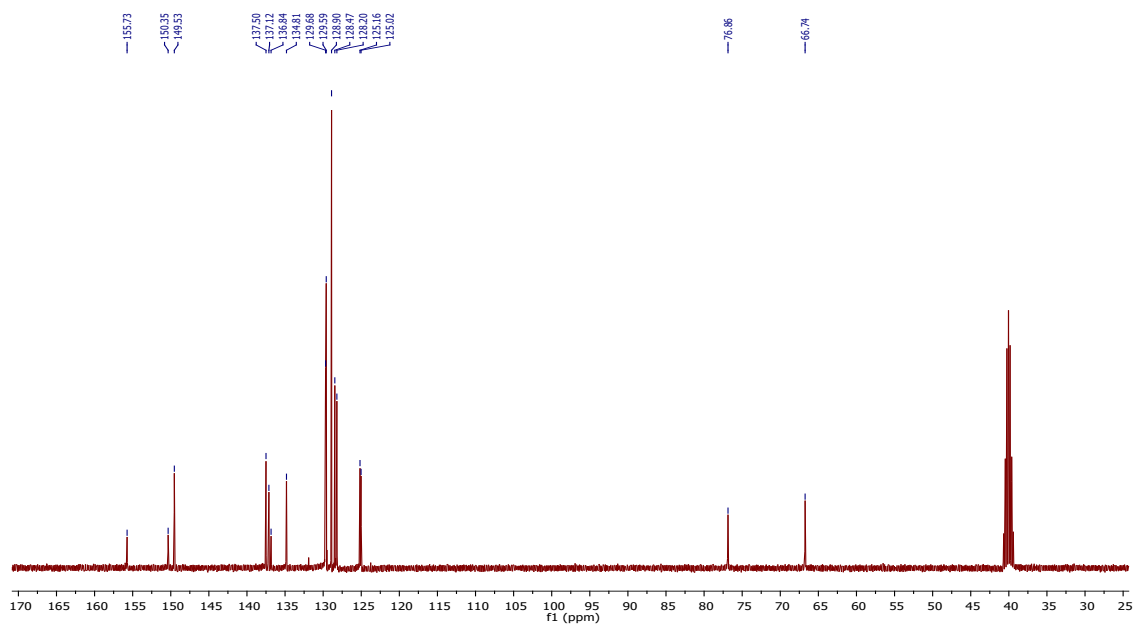

### <sup>1</sup>H NMR spectrum of **1k**

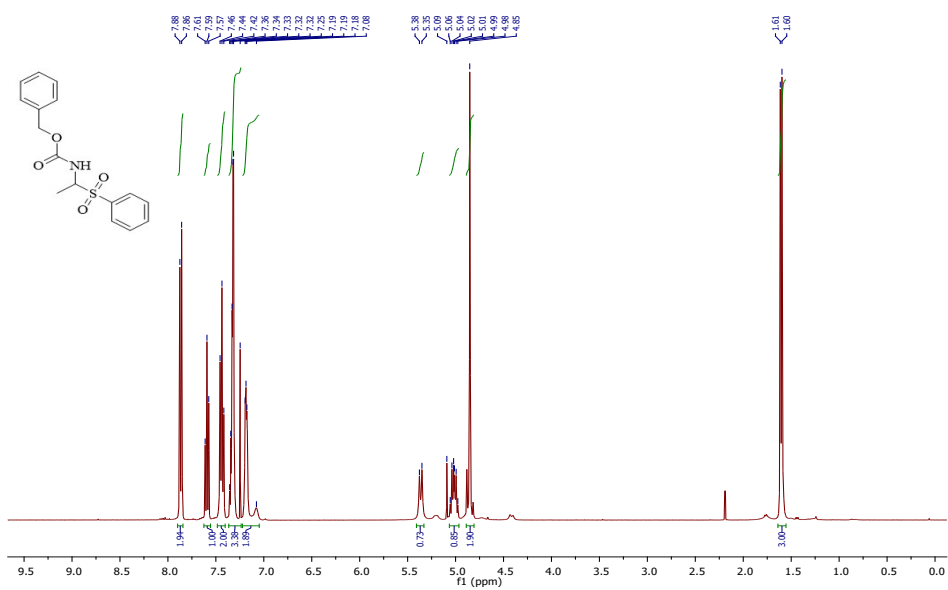

### <sup>13</sup>C NMR spectrum of **1k**

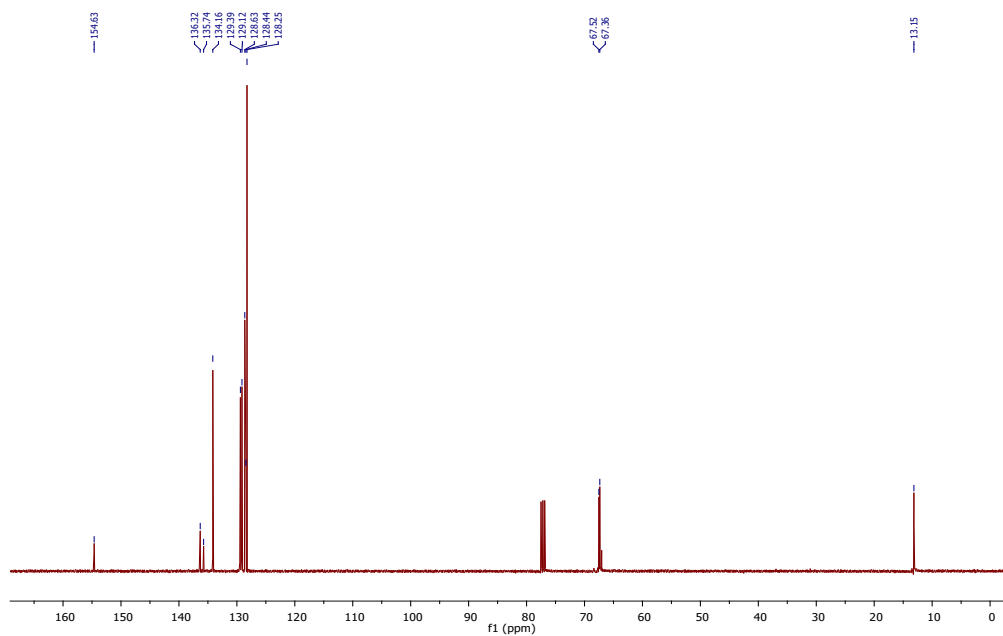

### <sup>1</sup>H NMR spectrum of **1f**

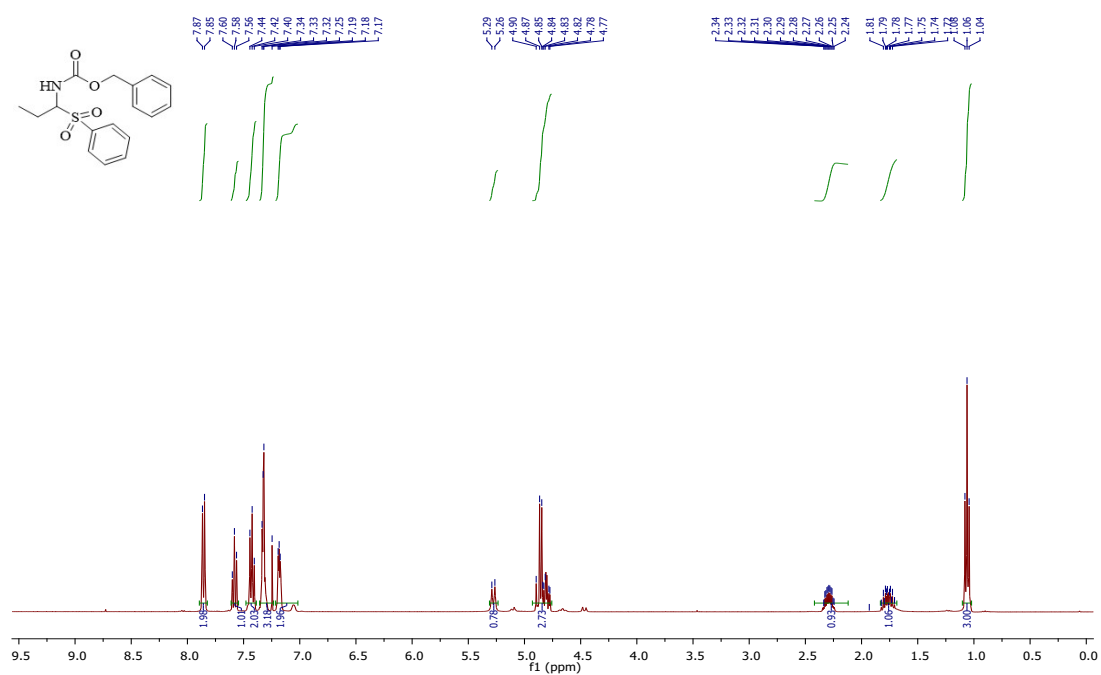

### <sup>13</sup>C NMR spectrum of **1f**

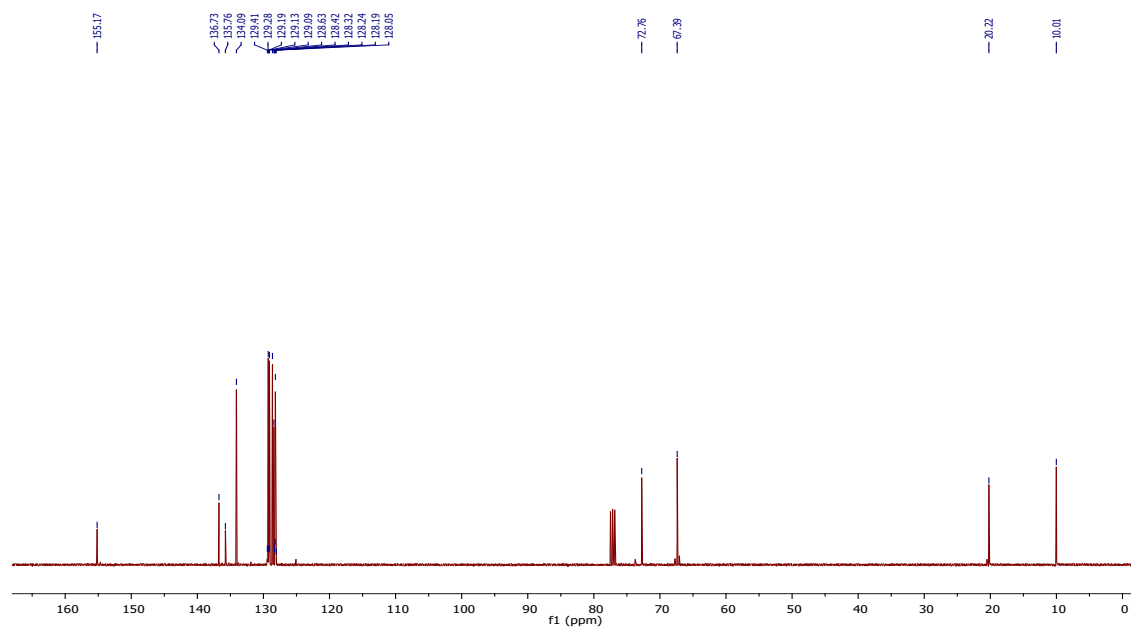



### <sup>1</sup>H NMR spectrum of **1h**

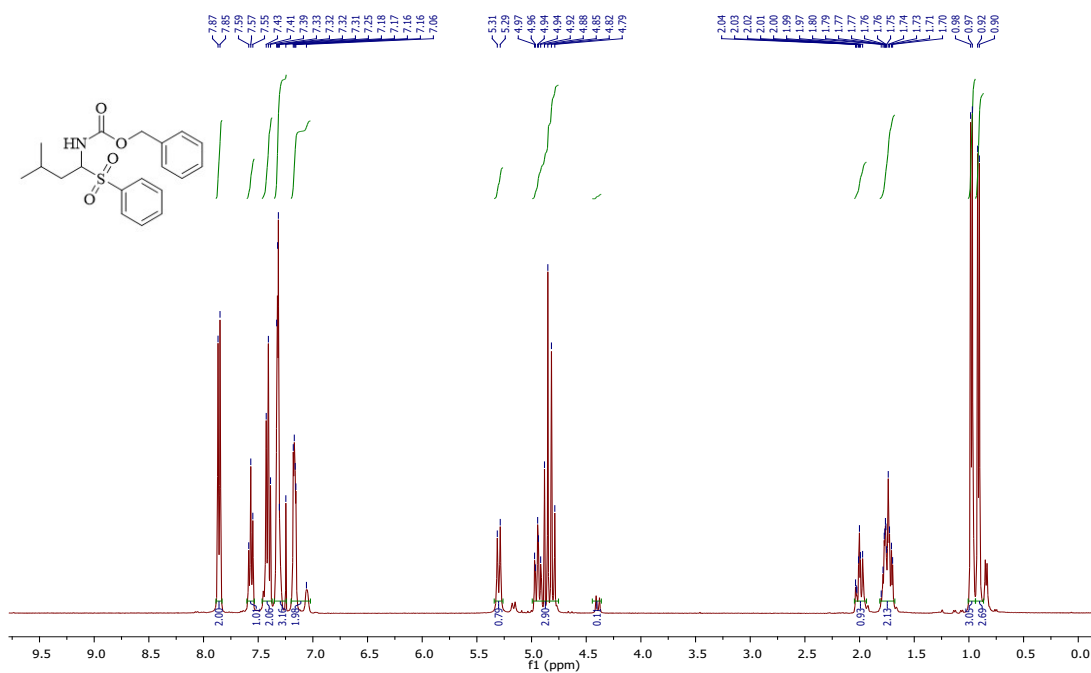

### <sup>13</sup>C NMR spectrum of **1h**

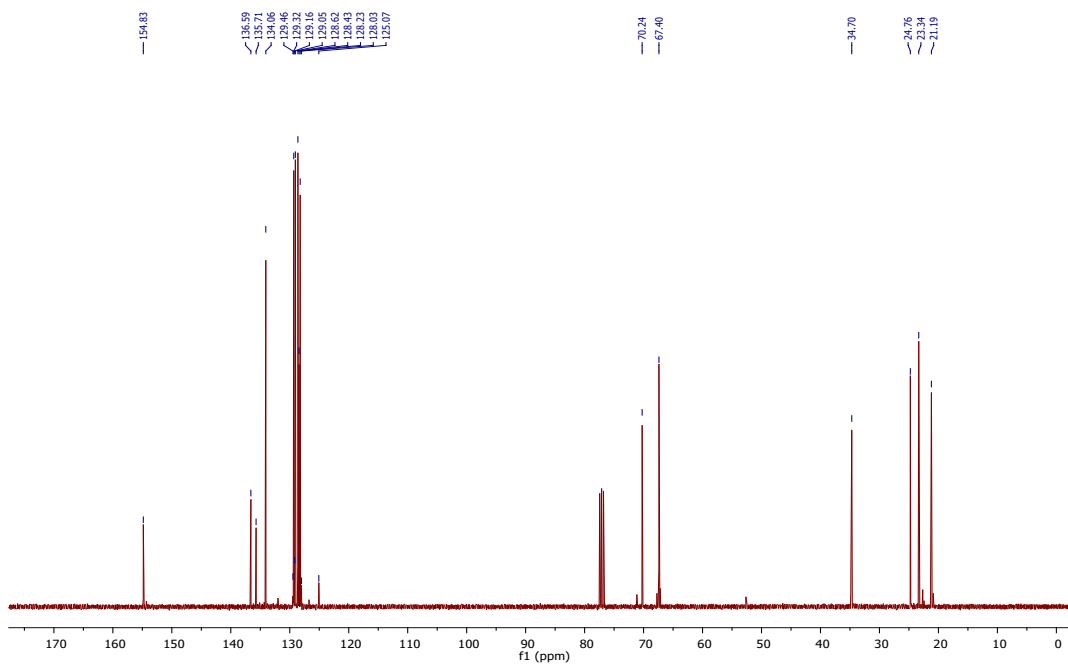

### <sup>1</sup>H NMR spectrum of **1i**

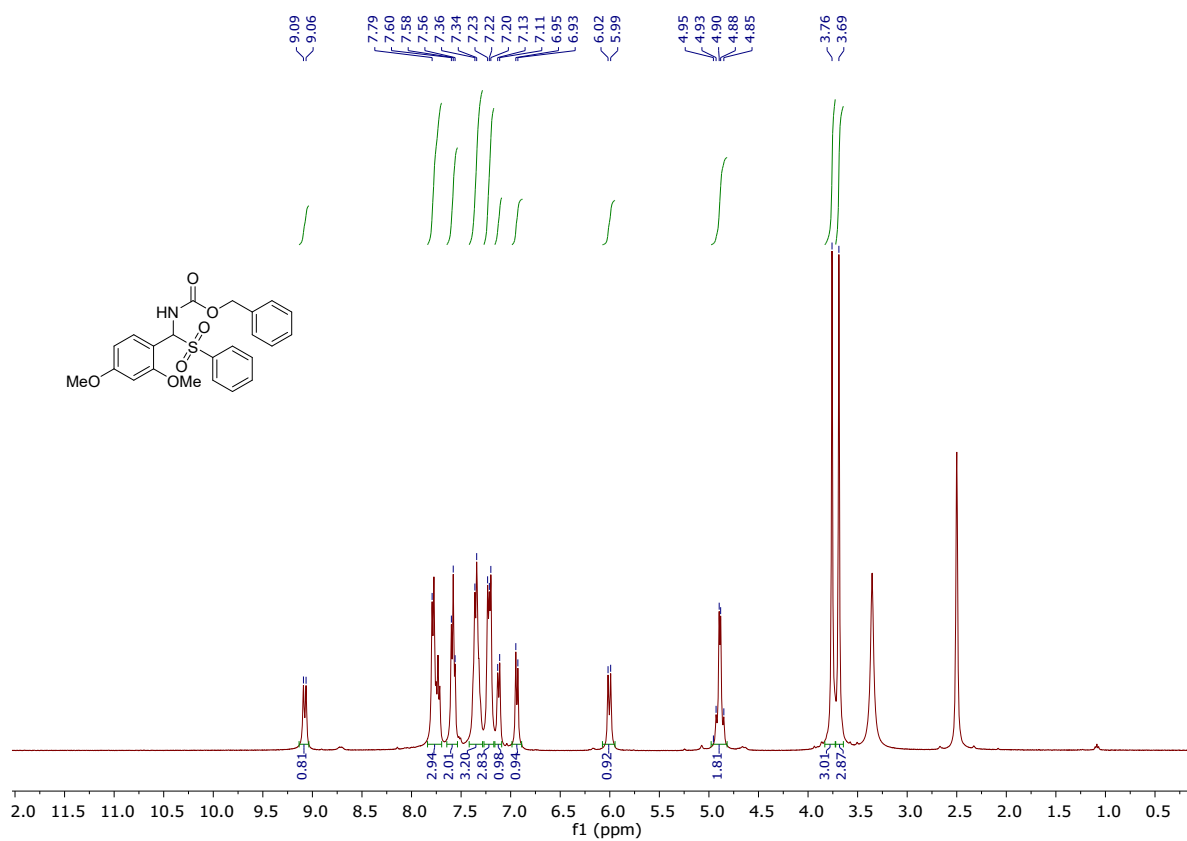

### <sup>13</sup>C NMR spectrum of **1i**

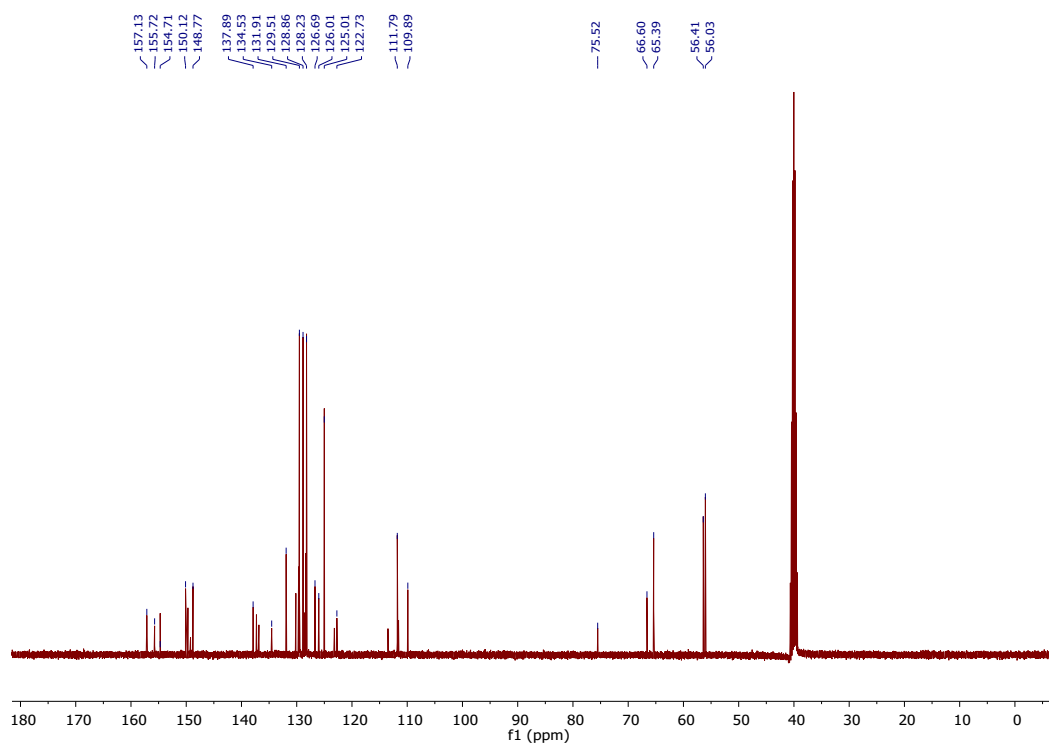

### <sup>1</sup>H NMR spectrum of **1j**

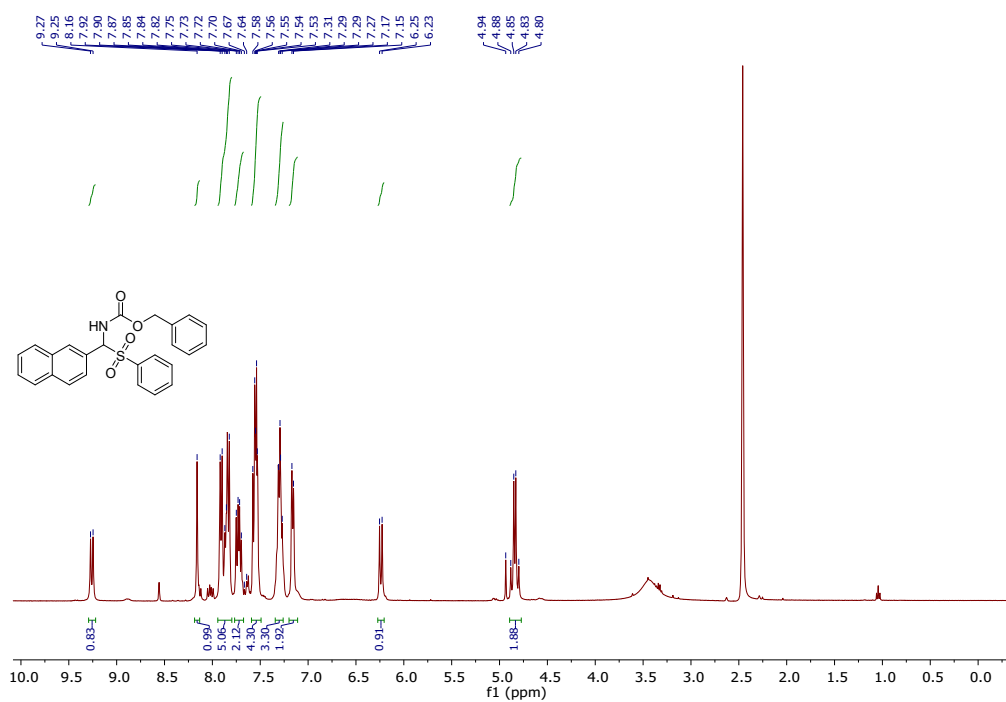

### <sup>13</sup>C NMR spectrum of **1j**

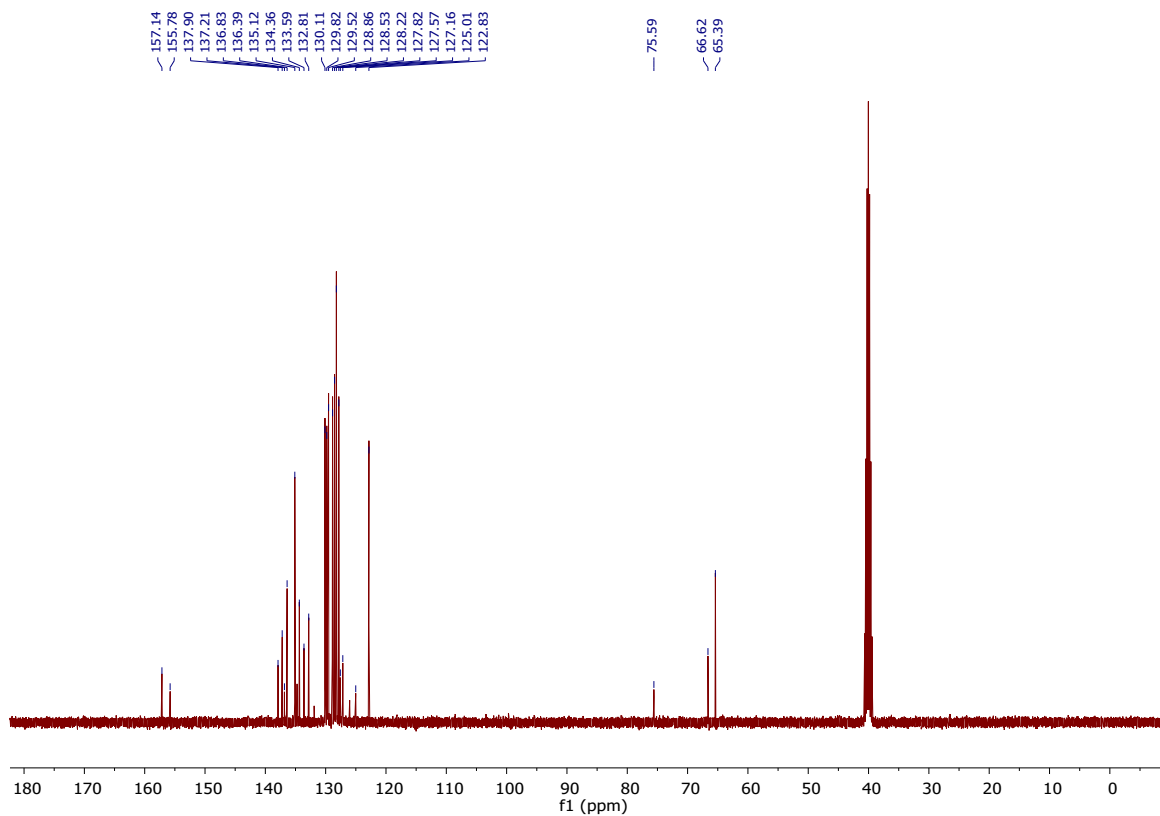



### <sup>1</sup>H NMR spectrum of **3a**

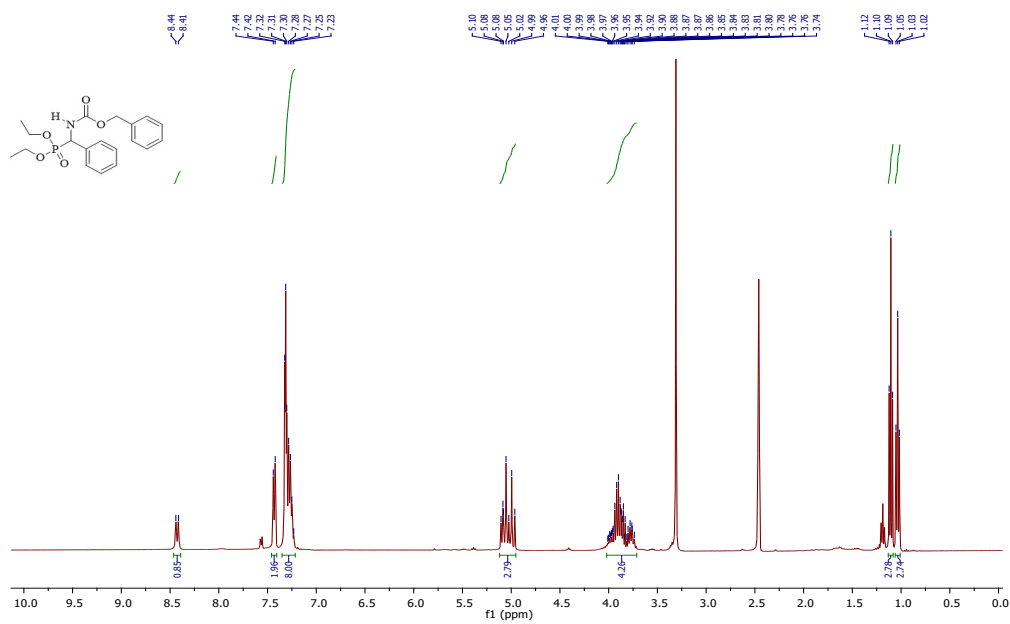

### <sup>13</sup>C NMR spectrum of **3a**

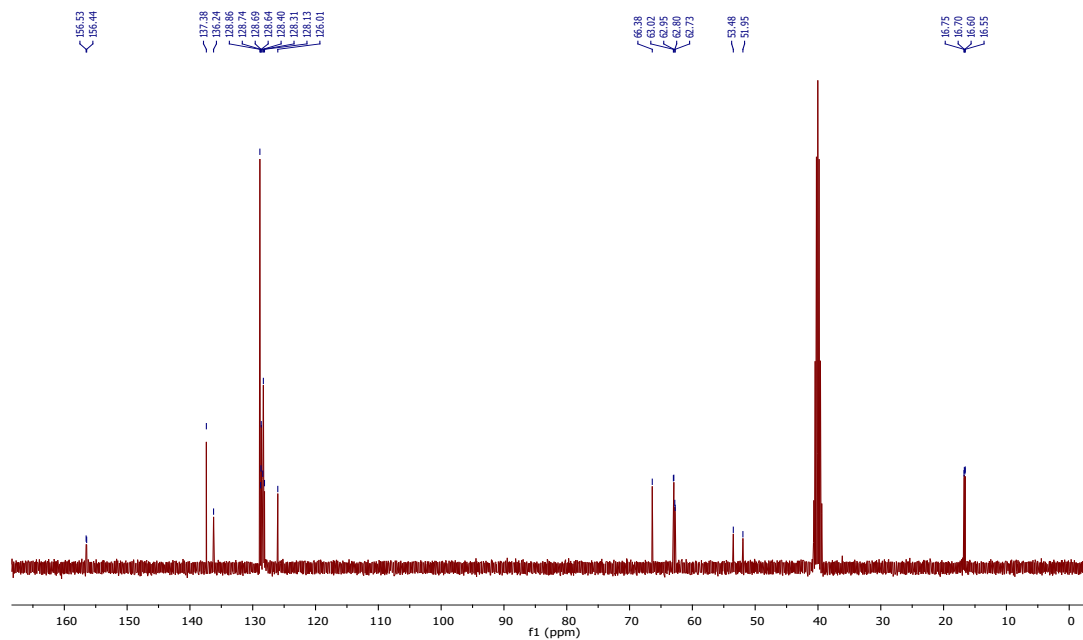

### <sup>31</sup>P NMR spectrum of 3a

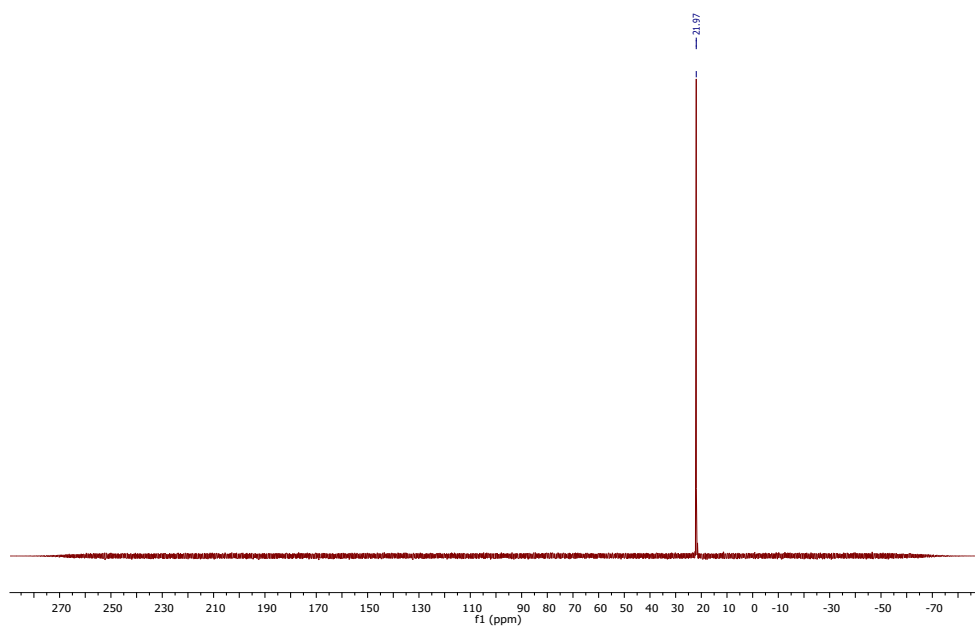

### <sup>1</sup>H NMR spectrum of 3b

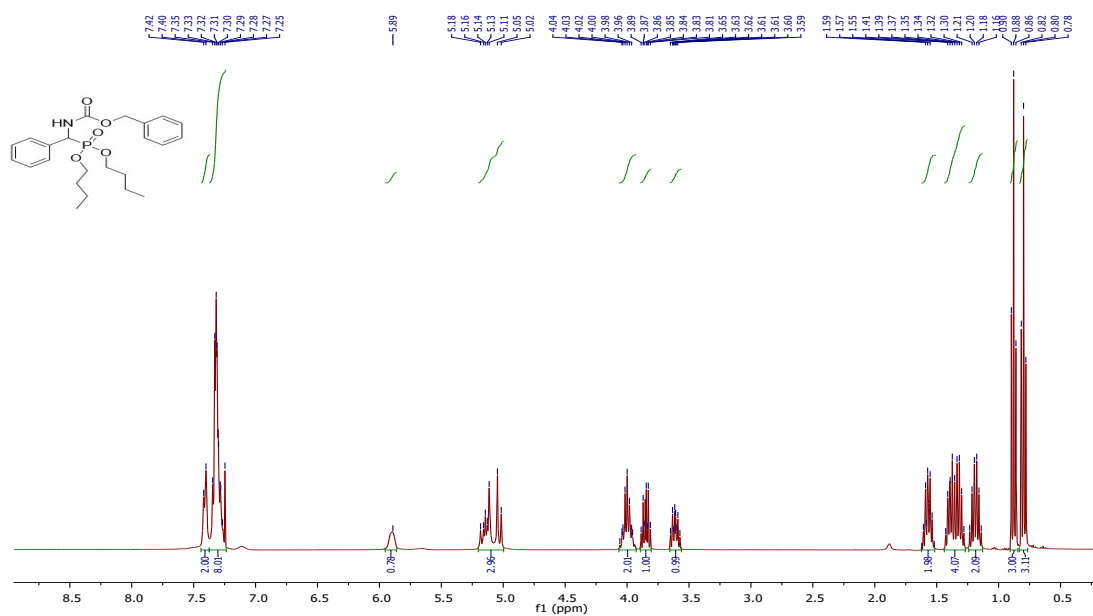

### $^{13}\text{C}$ NMR spectrum of **3b**

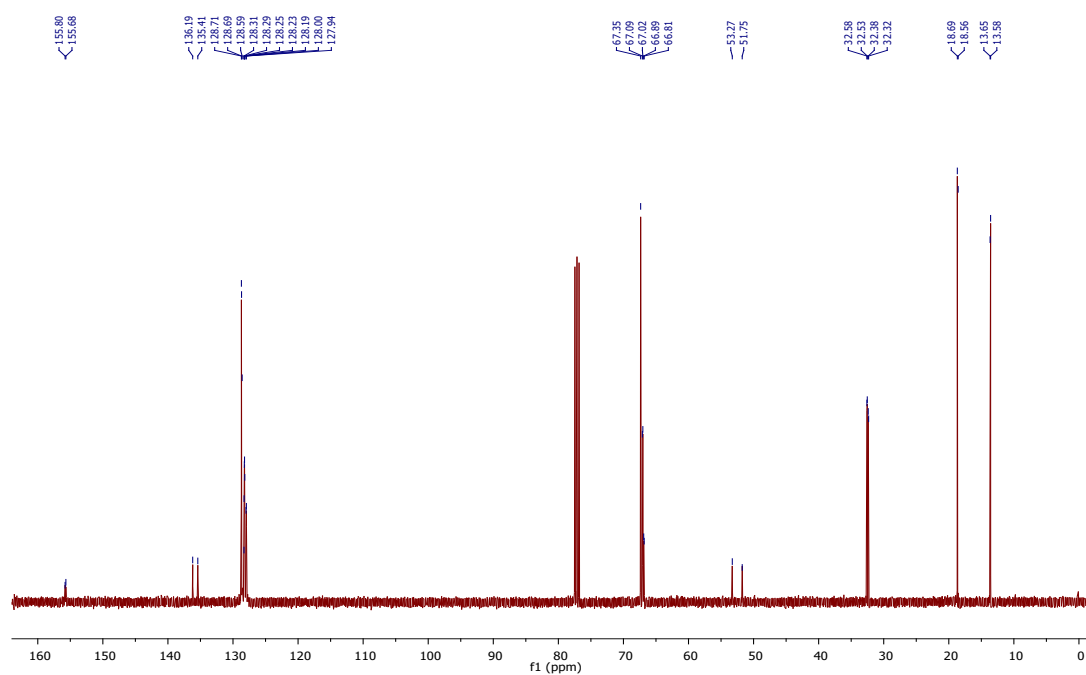

### $^{31}\text{P}$ NMR spectrum of **3b**

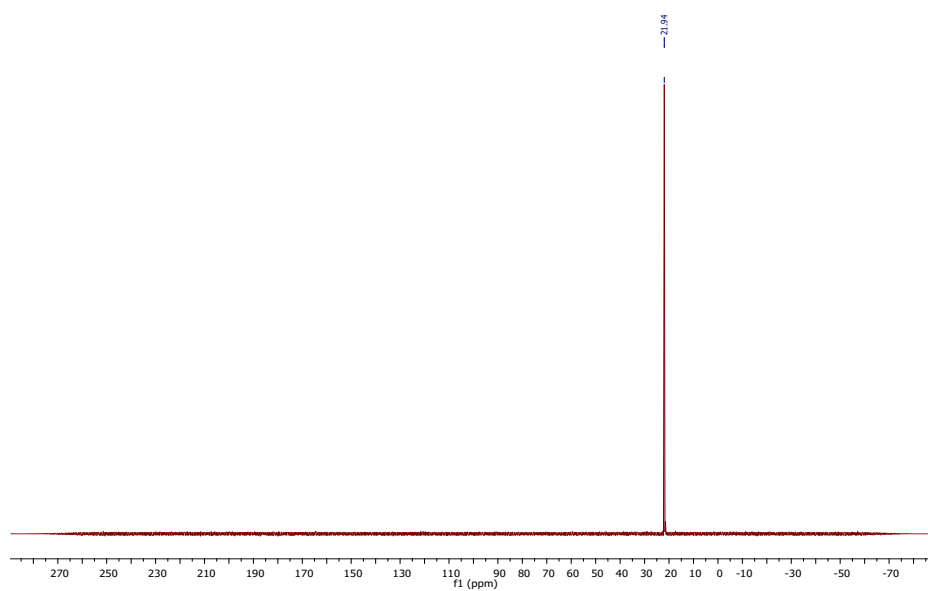

### <sup>1</sup>H NMR spectrum of 3c

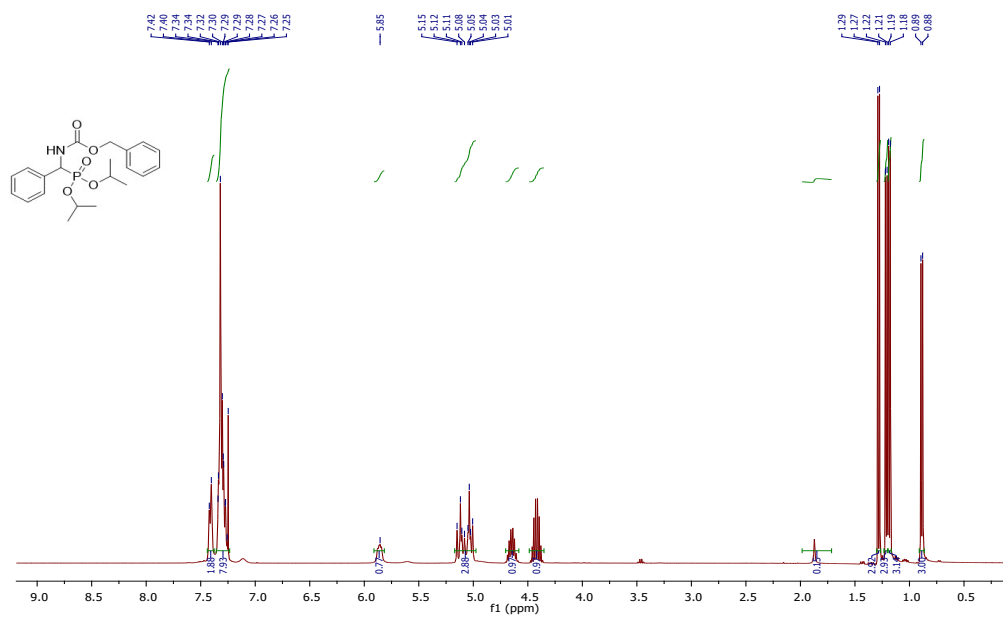

### <sup>13</sup>C NMR spectrum of 3c

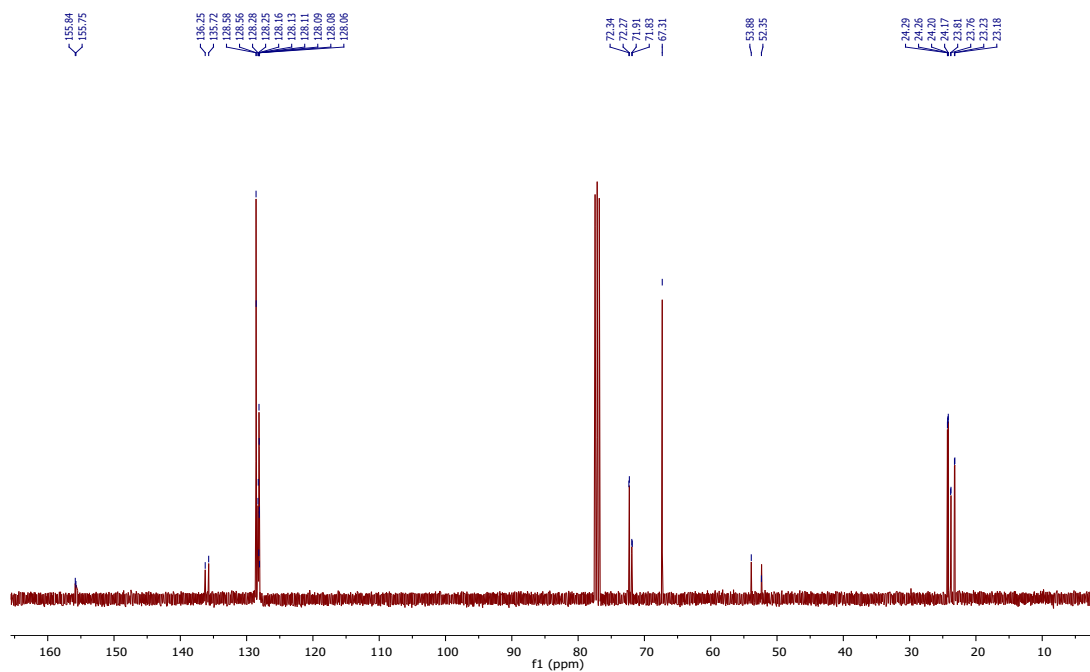

<sup>31</sup>P NMR spectrum of **3c**

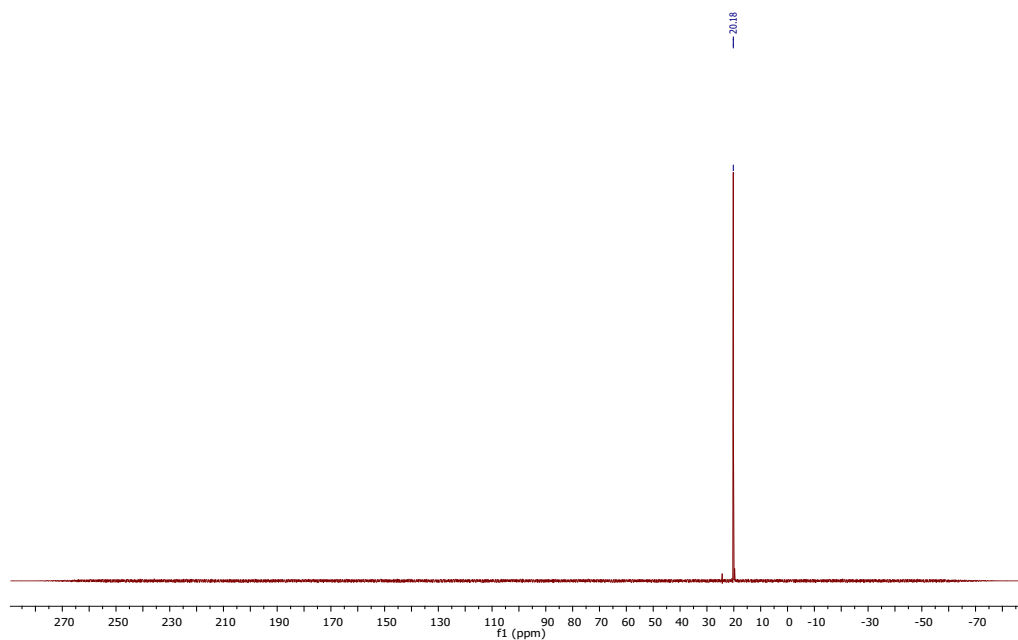

<sup>1</sup>H NMR spectrum of **3d**

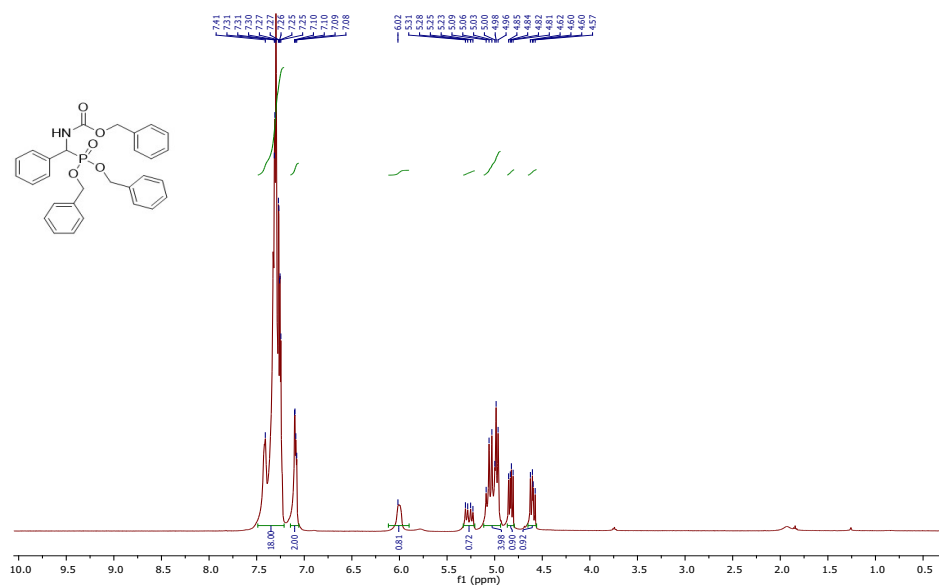

### $^{13}\text{C}$ NMR spectrum of **3d**

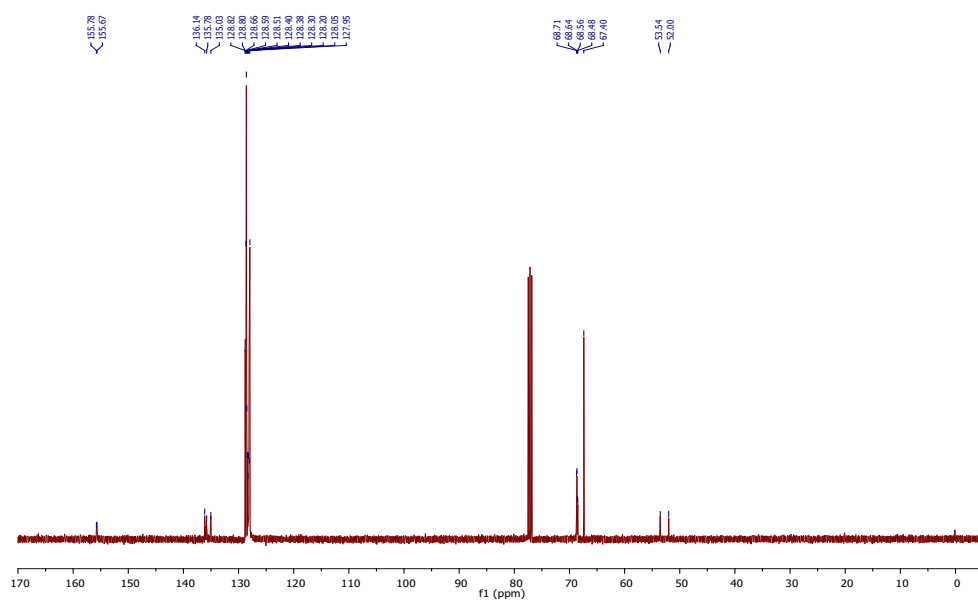

### <sup>1</sup>H NMR spectrum of **3e**

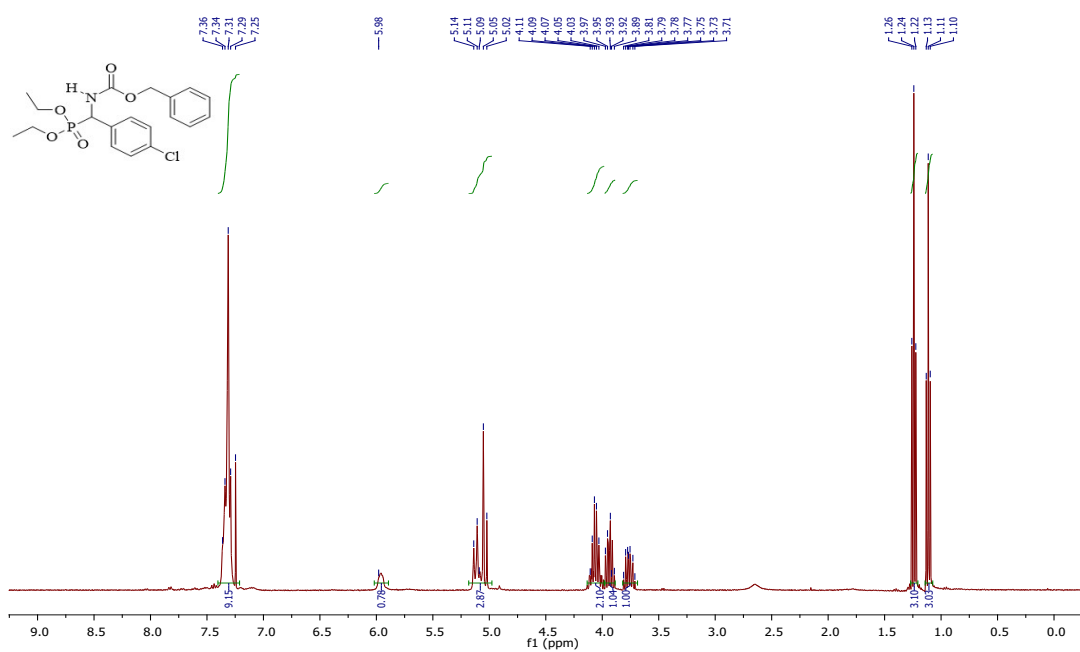

### <sup>13</sup>C NMR spectrum of **3e**

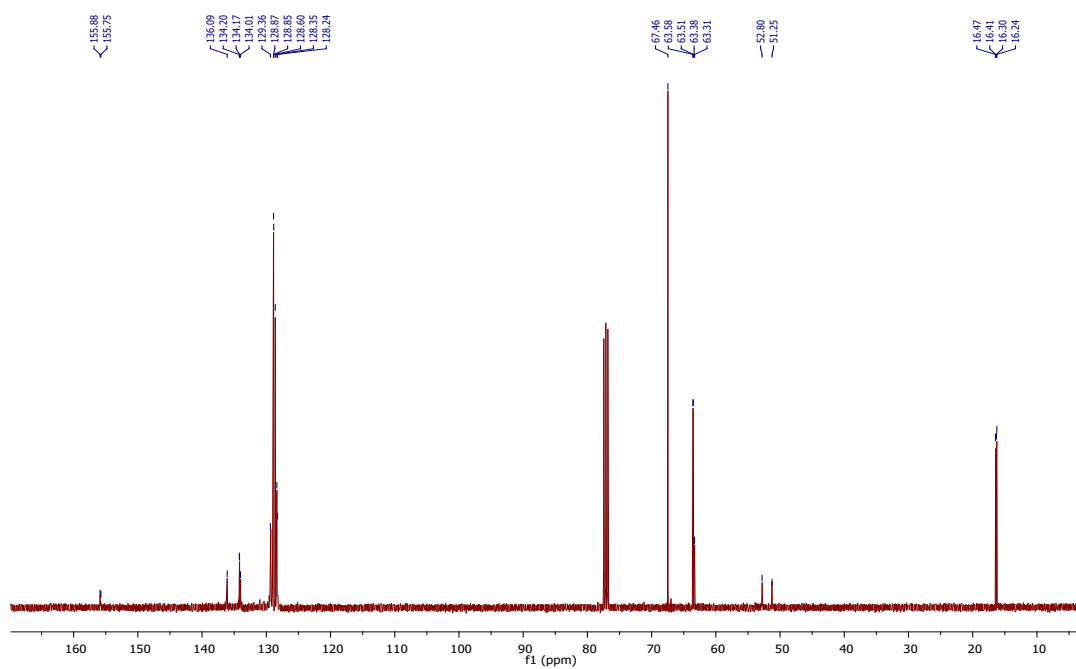

<sup>31</sup>P NMR spectrum of **3e**

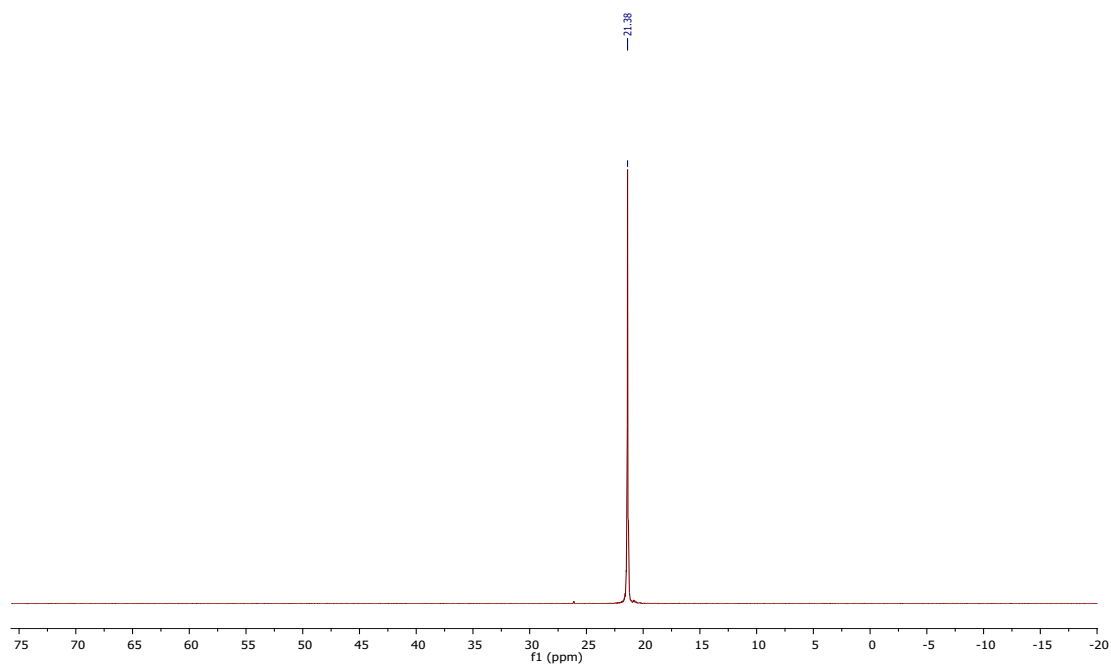

<sup>1</sup>H NMR spectrum of **3f**

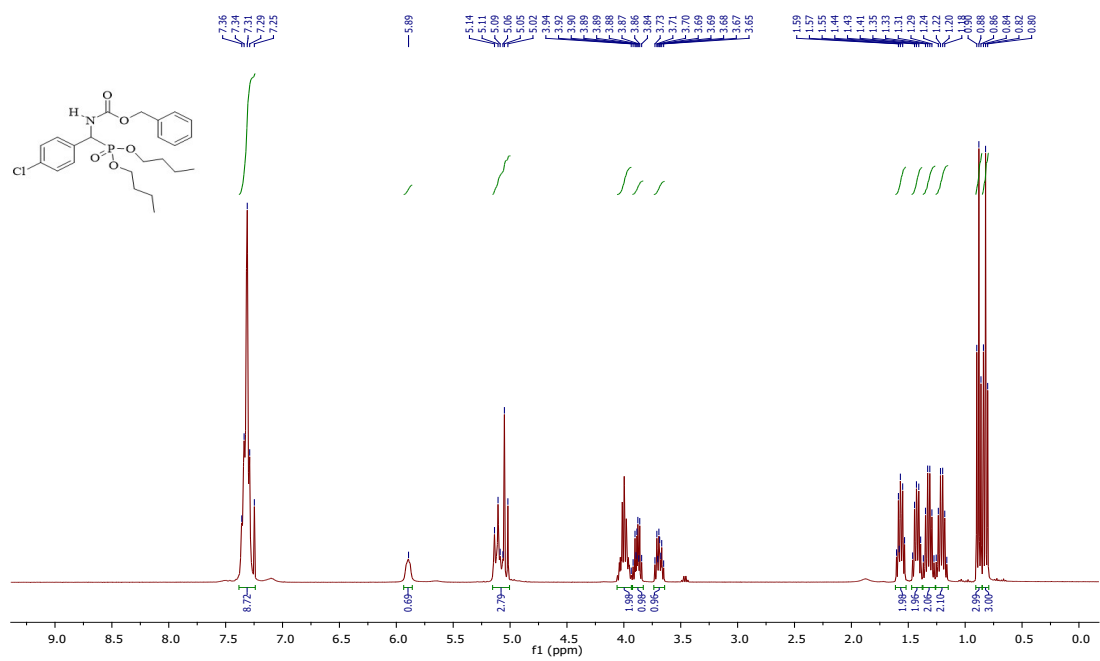



### $^{13}\text{C}$ NMR spectrum of **3f**

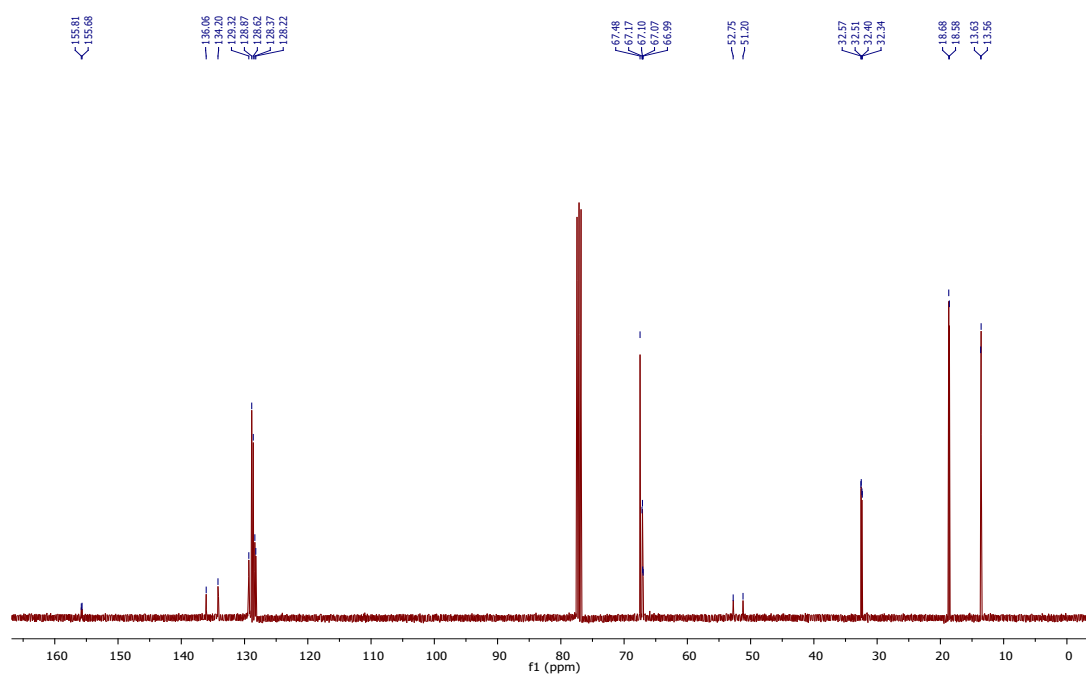

### $^{31}\text{P}$ NMR spectrum of **3f**

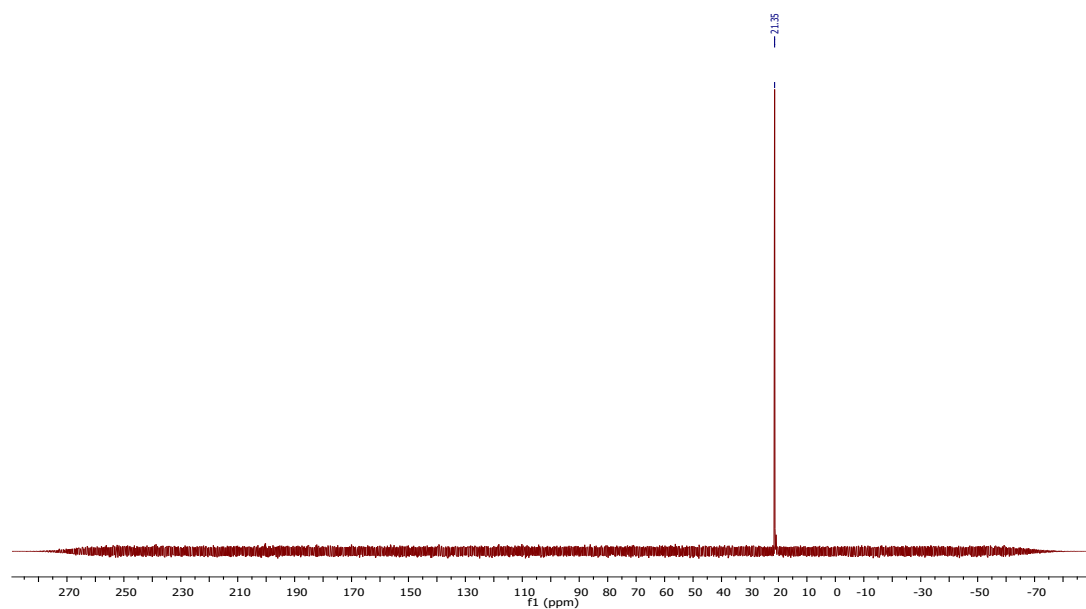

### <sup>1</sup>H NMR spectrum of **3g**

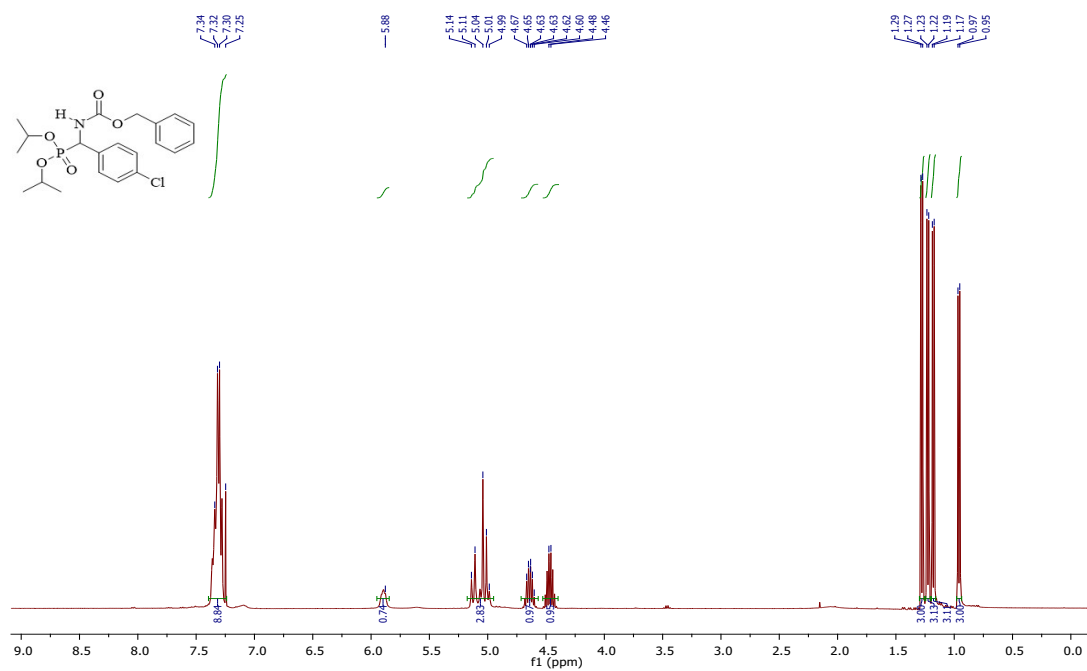

### <sup>13</sup>C NMR spectrum of **3g**

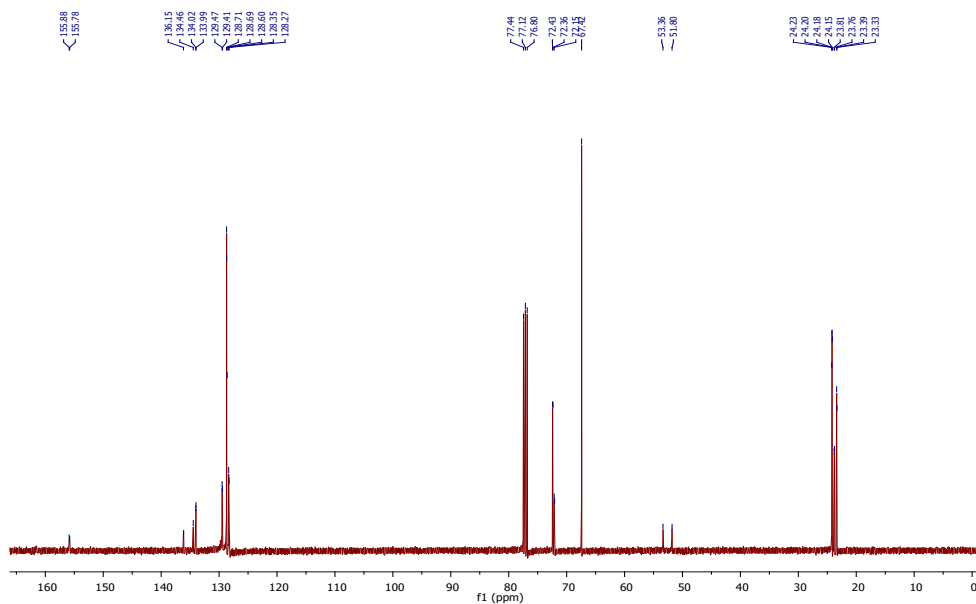

<sup>31</sup>P NMR spectrum of **3g**

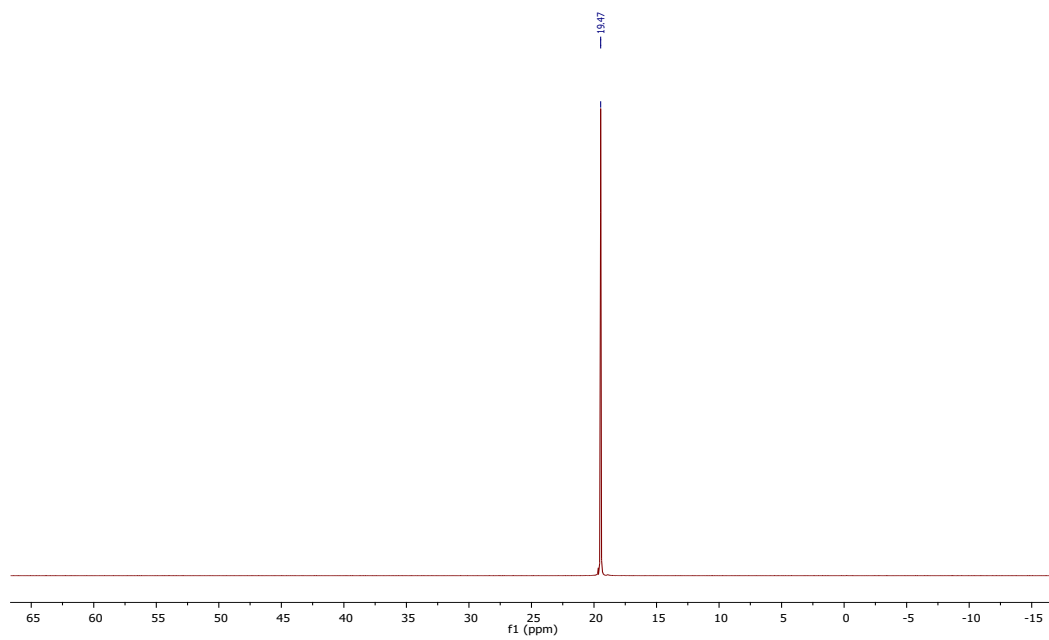

<sup>1</sup>H NMR spectrum of **3h**

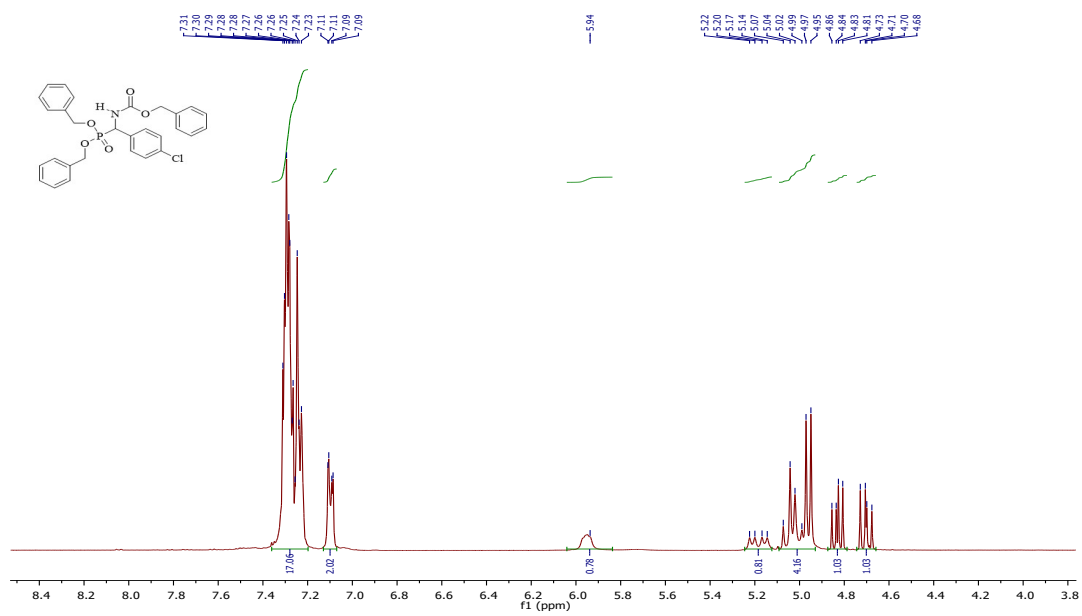

### <sup>13</sup>C NMR spectrum of **3h**

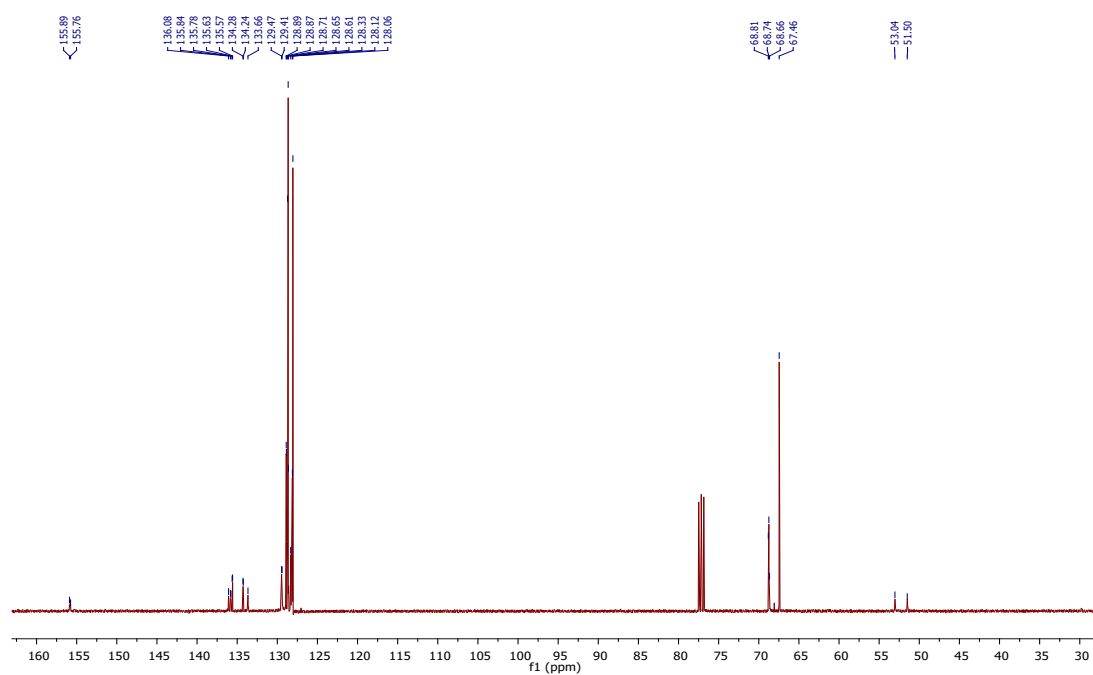

### <sup>31</sup>P NMR spectrum of **3h**

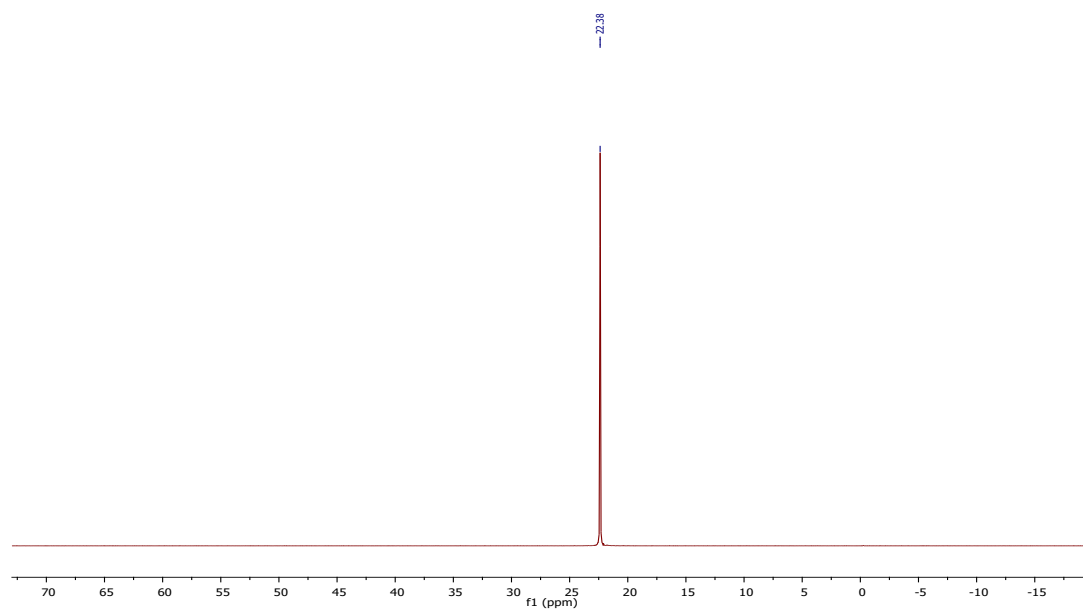

### <sup>1</sup>H NMR spectrum of **3i**

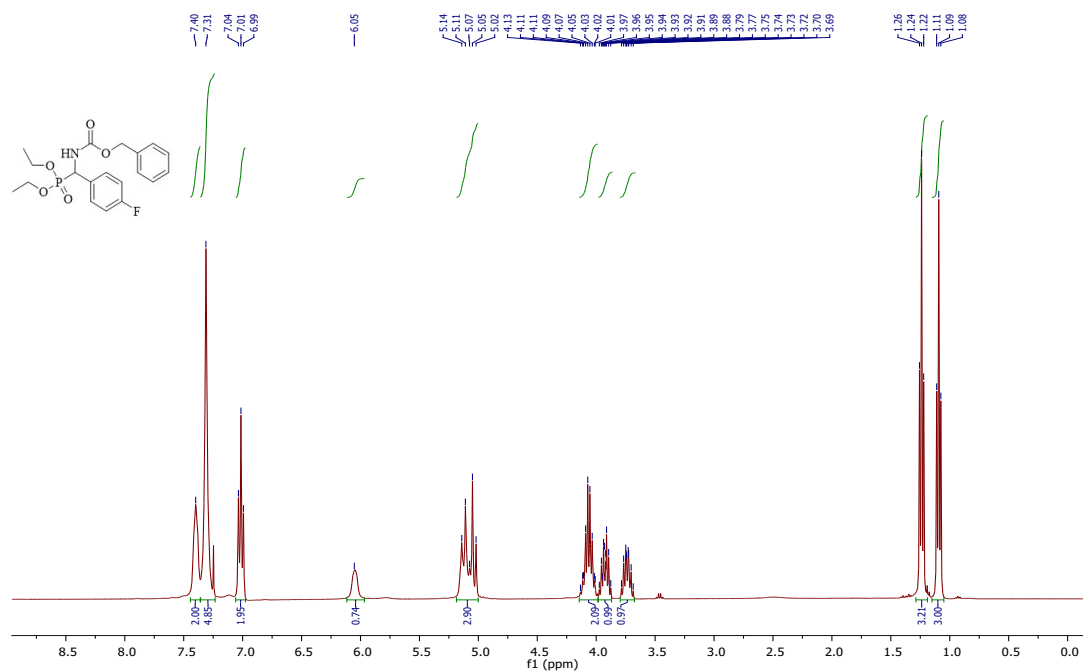

### <sup>13</sup>C NMR spectrum of **3i**

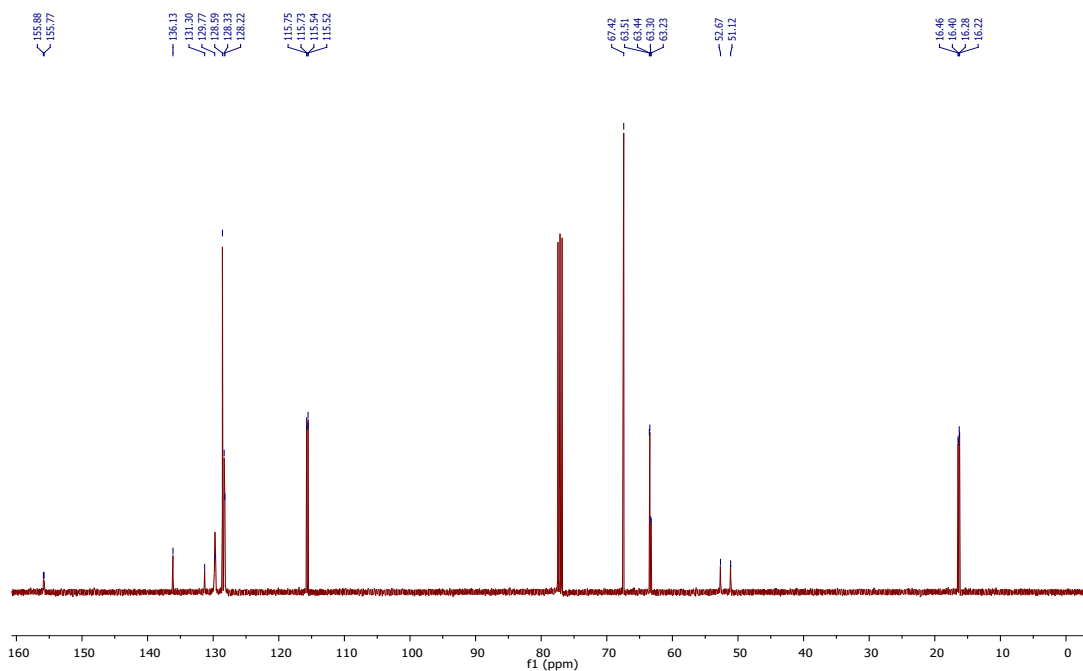

<sup>31</sup>P NMR spectrum of **3i**

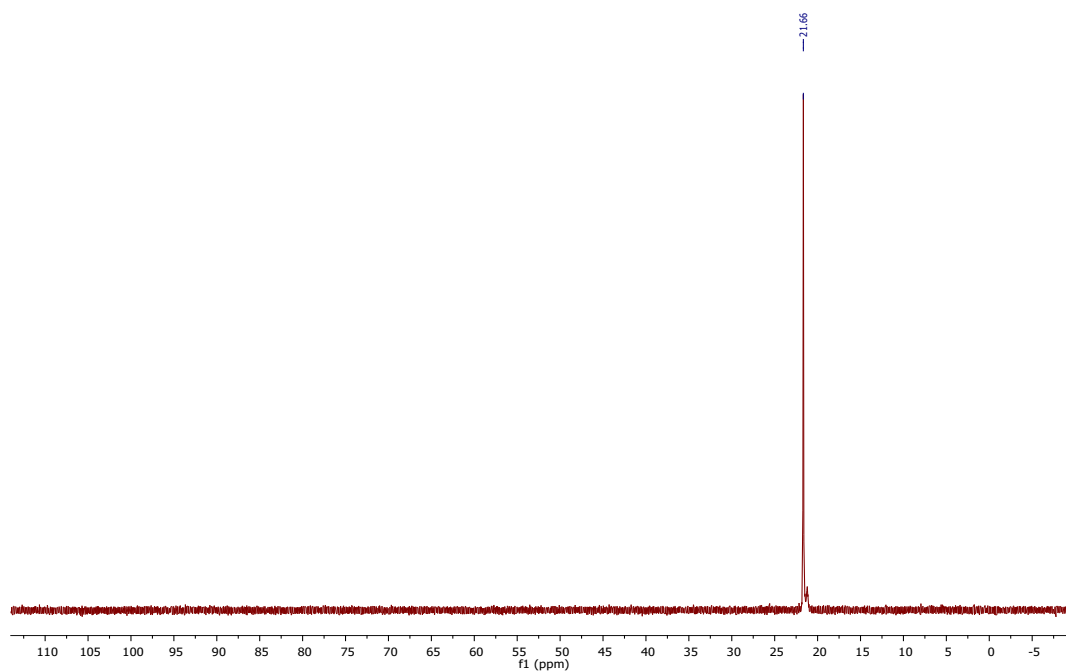

<sup>1</sup>H NMR spectrum of **3j**

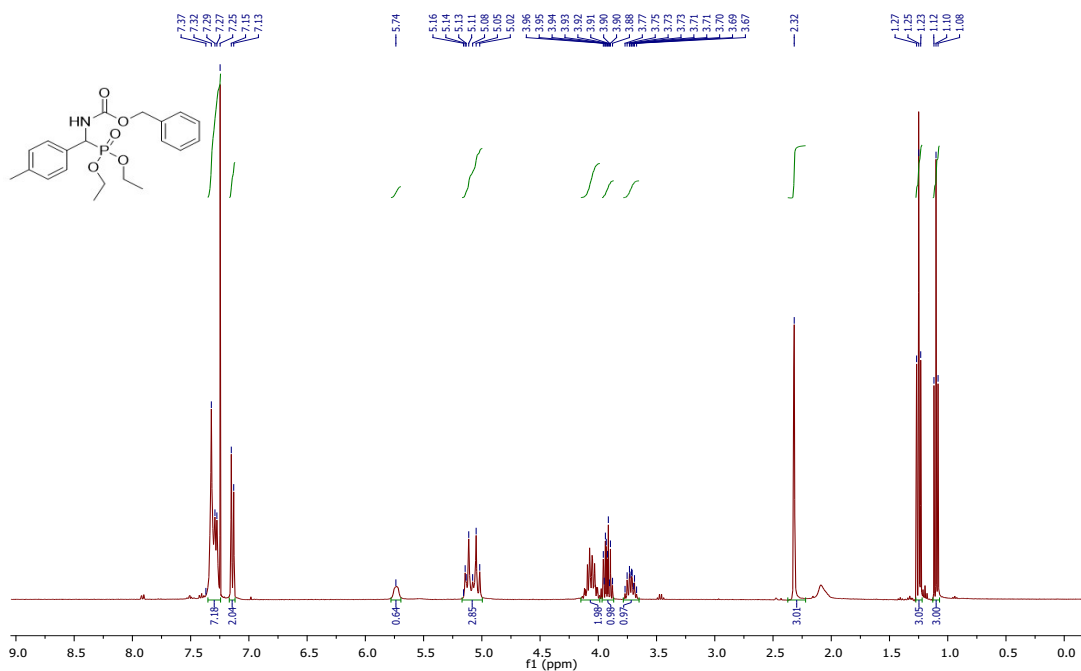

### $^{13}\text{C}$ NMR spectrum of **3j**

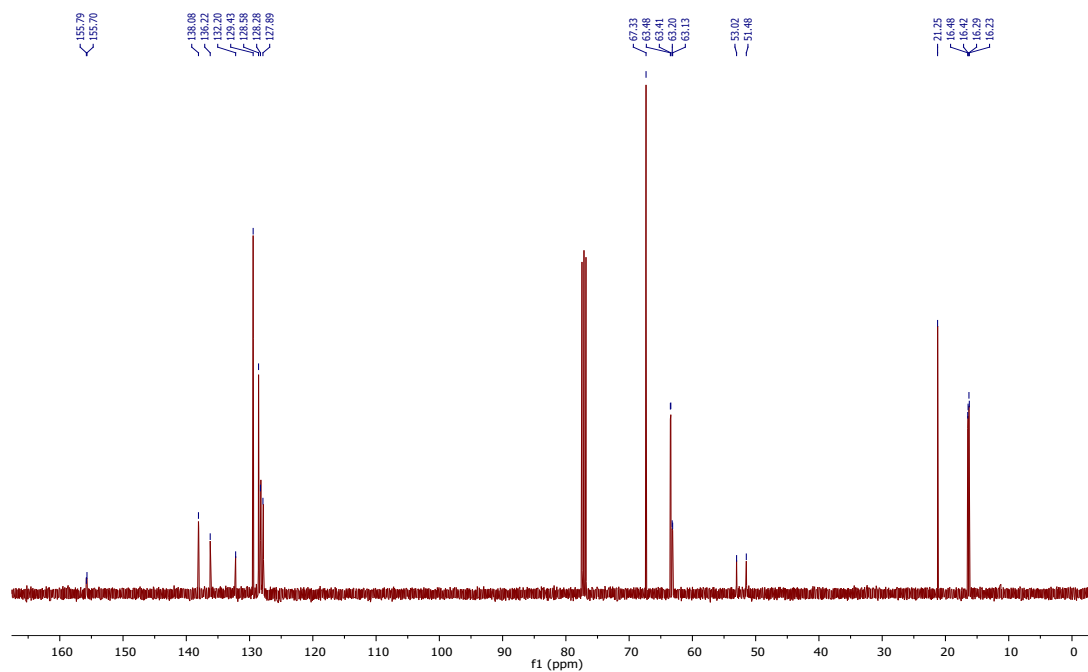

### $^{31}\text{P}$ NMR spectrum of **3j**

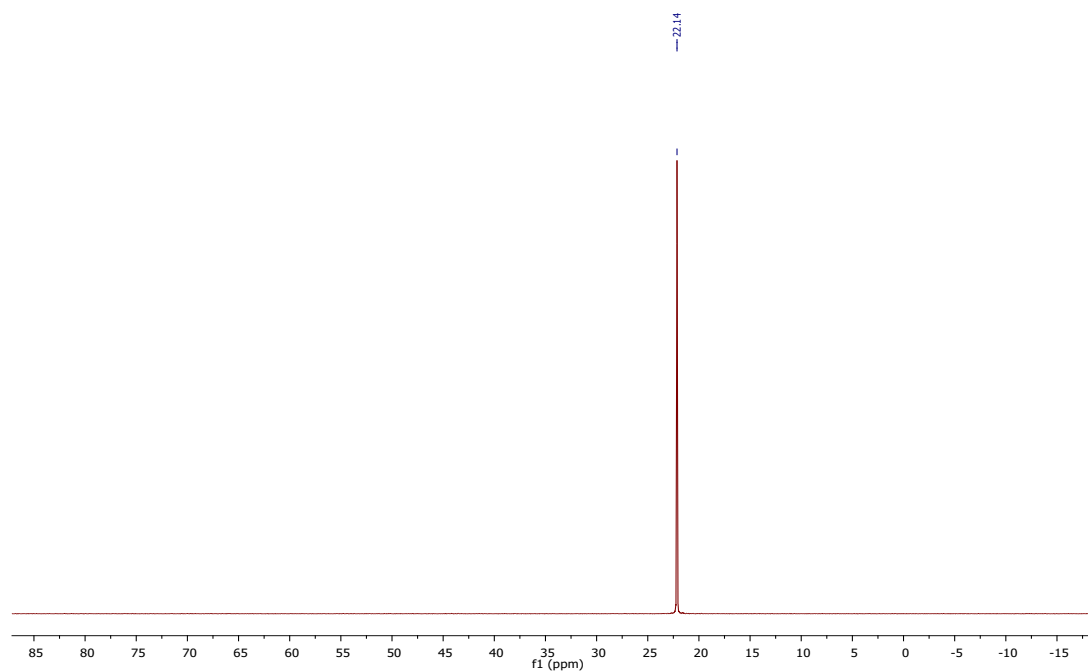

### <sup>1</sup>H NMR spectrum of **3k**

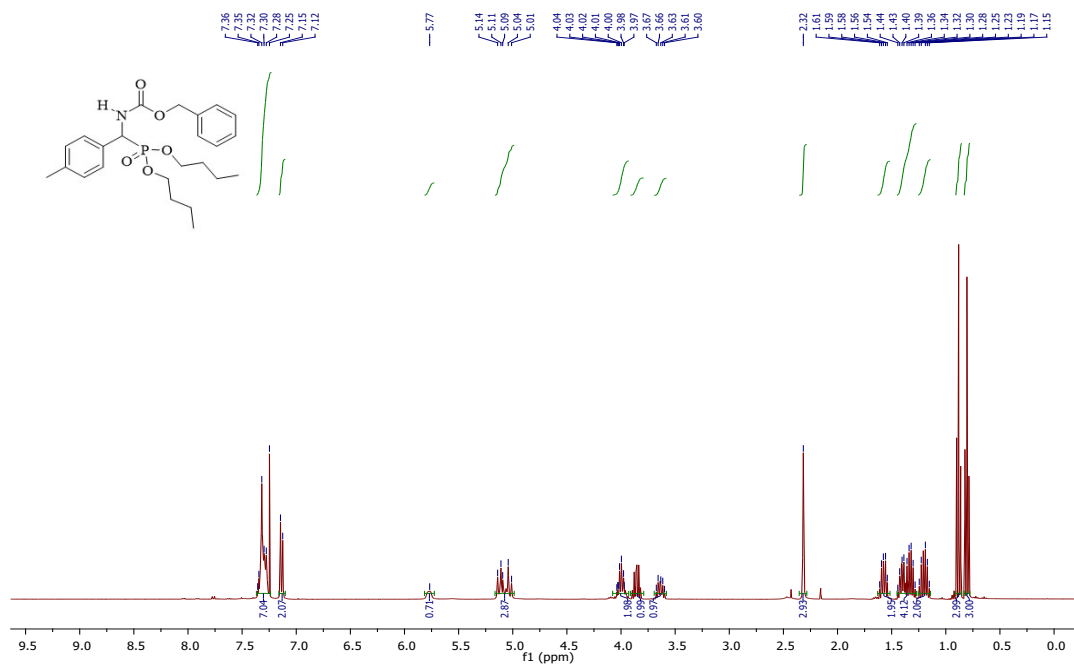

### <sup>13</sup>C NMR spectrum of **3k**

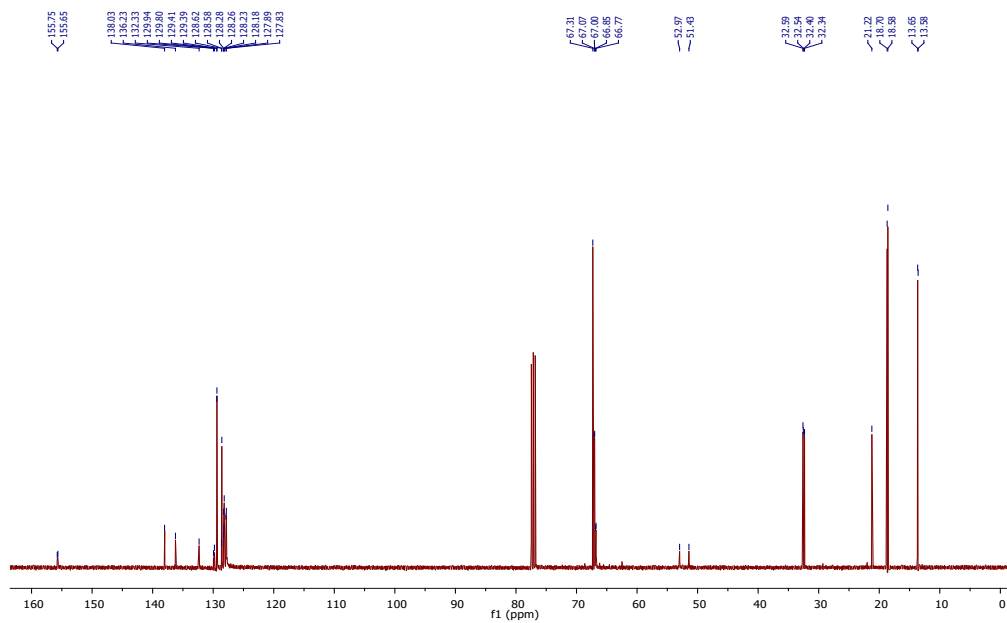



<sup>31</sup>P NMR spectrum of **3k**

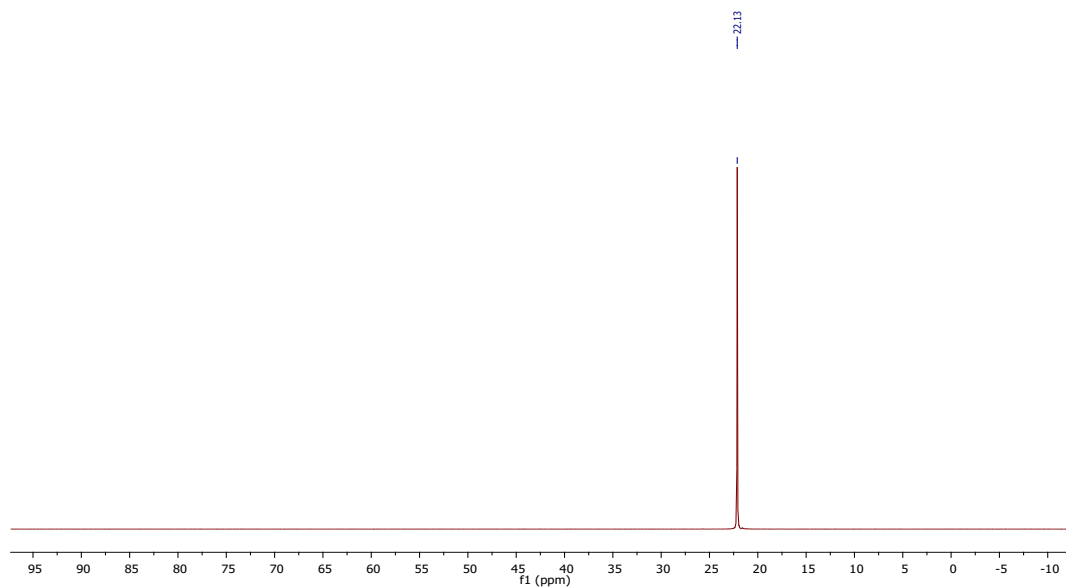

<sup>1</sup>H NMR spectrum of **3l**

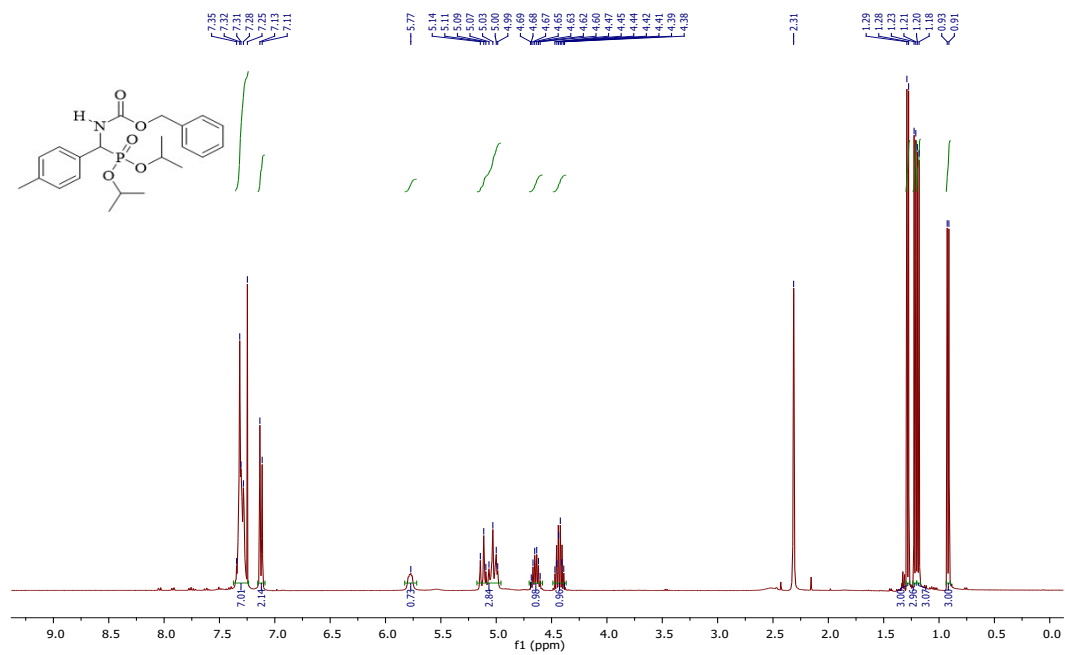

### $^{13}\text{C}$ NMR spectrum of **31**

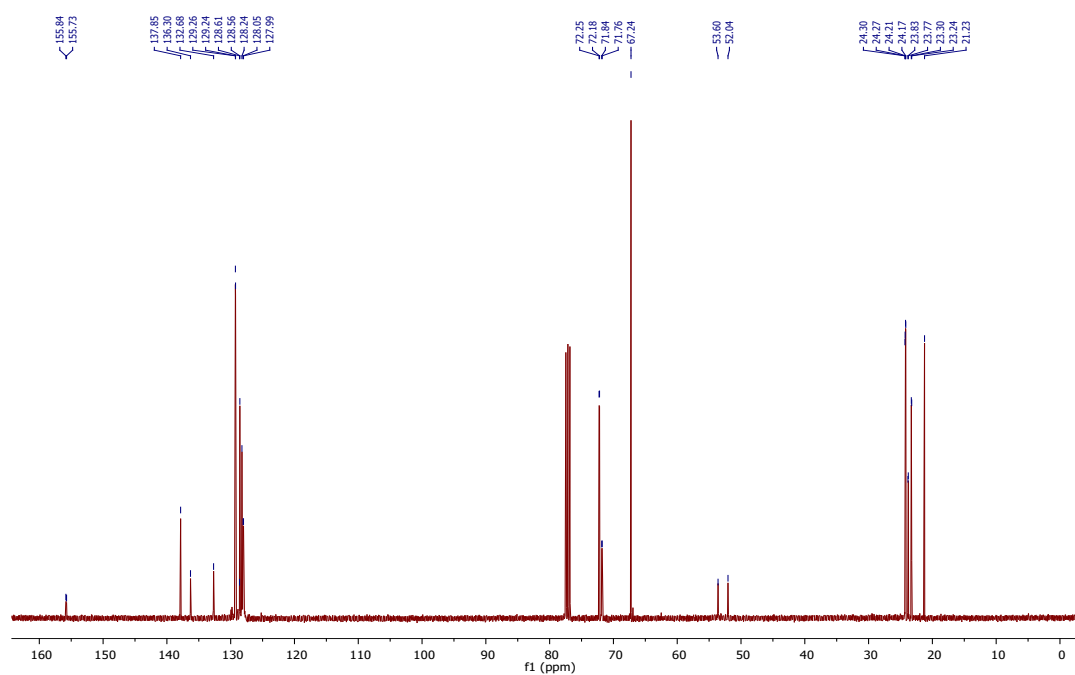

### $^{31}\text{P}$ NMR spectrum of **31**

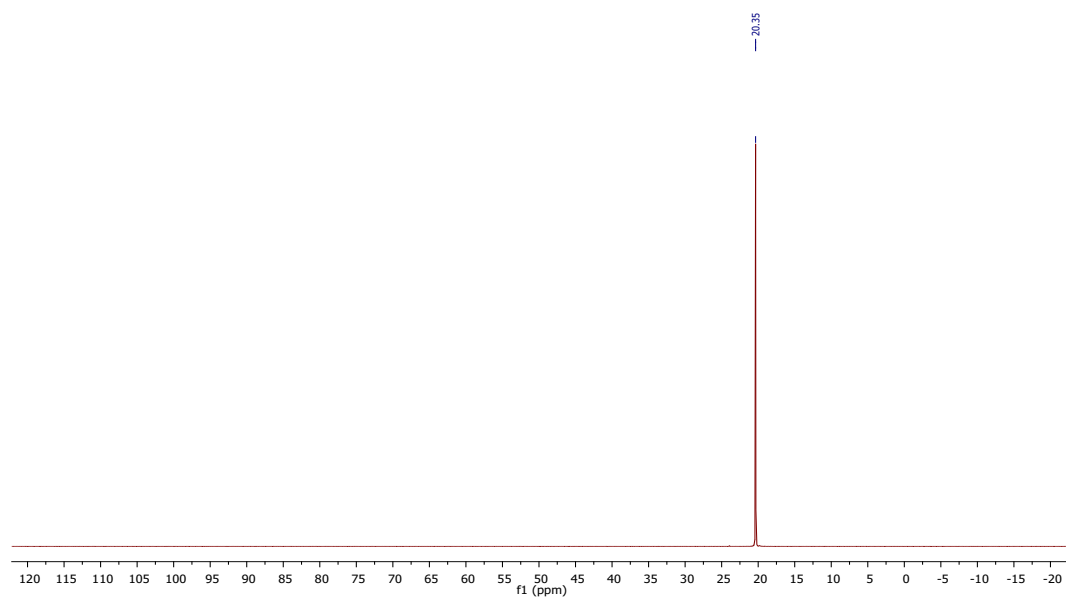

<sup>1</sup>H NMR spectrum of **3m**

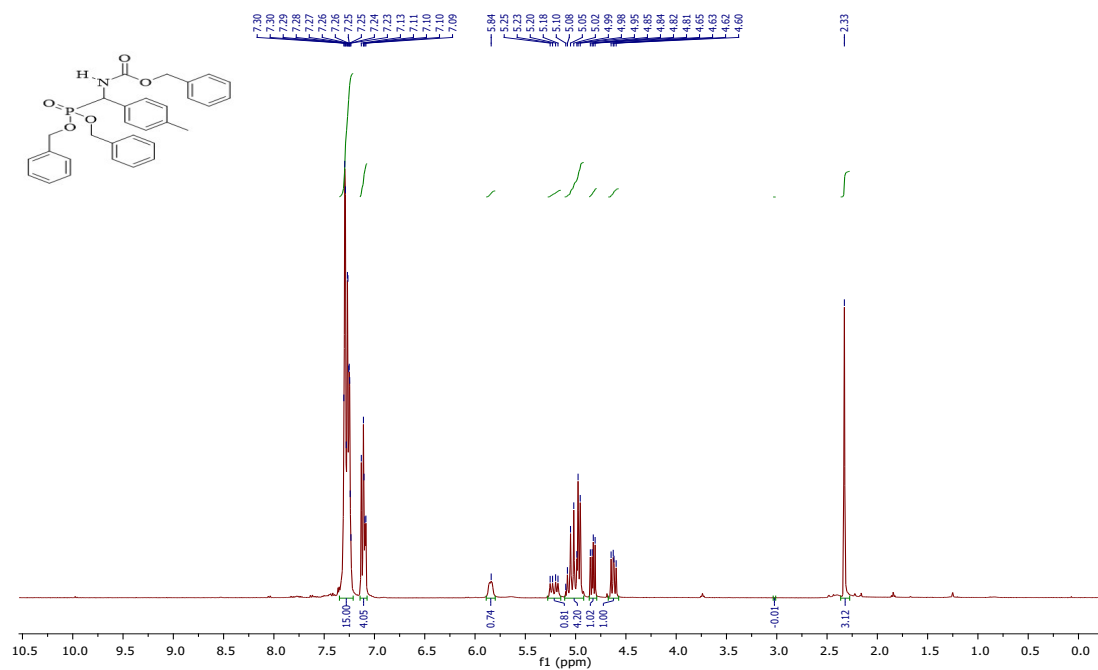

<sup>13</sup>C NMR spectrum of **3m**

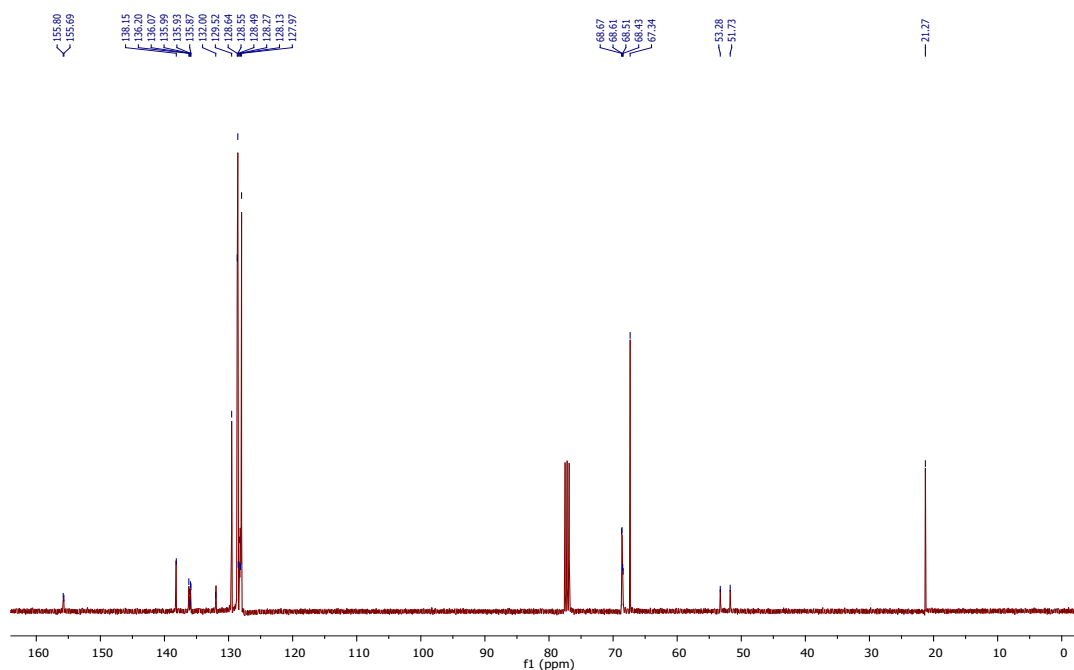

### $^{31}\text{P}$ NMR spectrum of **3m**

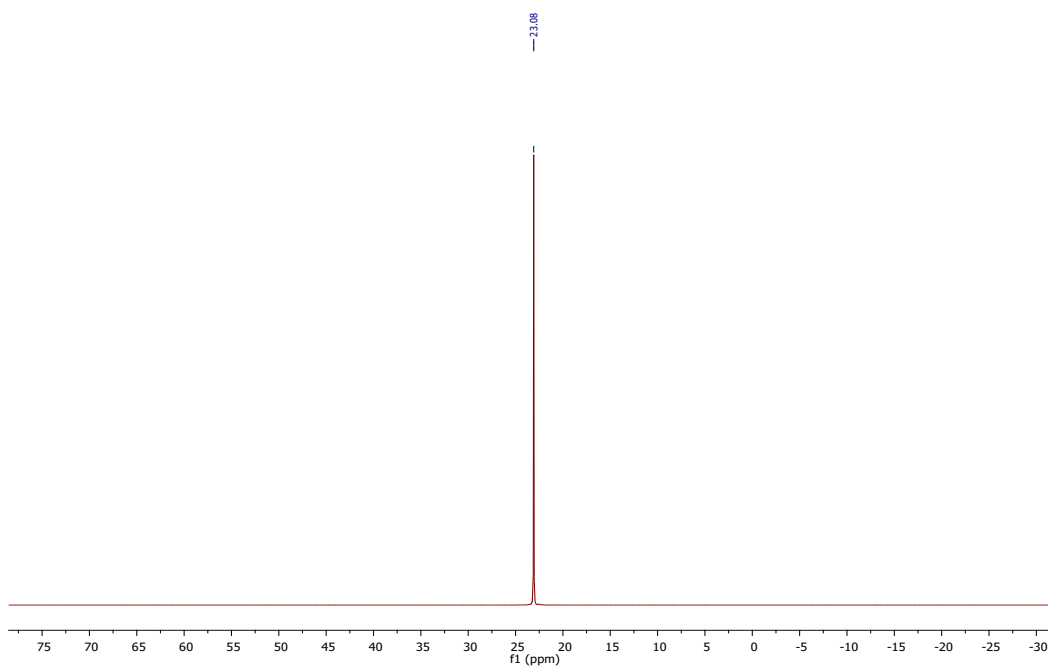

### $^1\text{H}$ NMR spectrum of **3n**

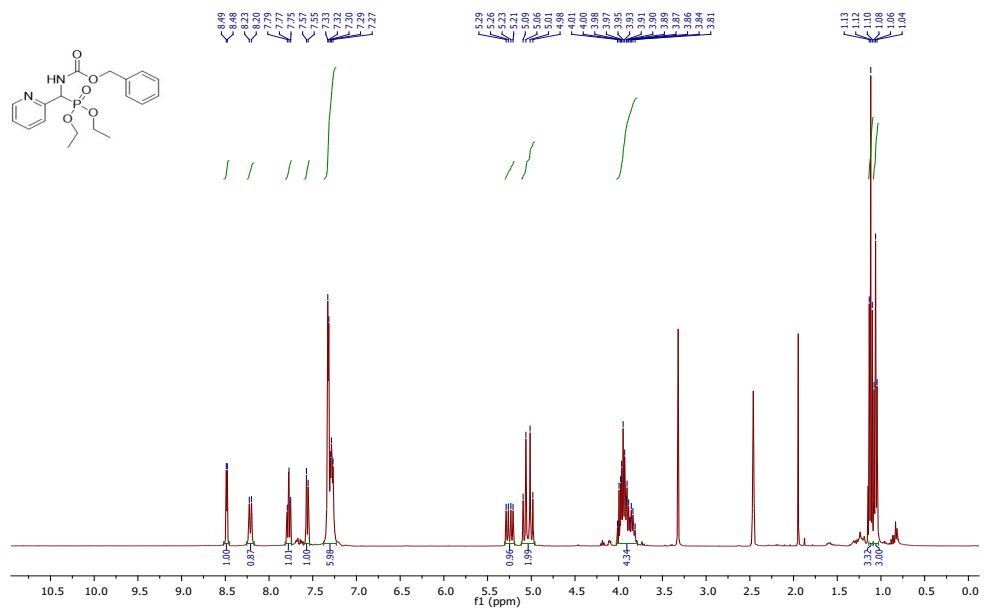

### $^{13}\text{C}$ NMR spectrum of **3n**

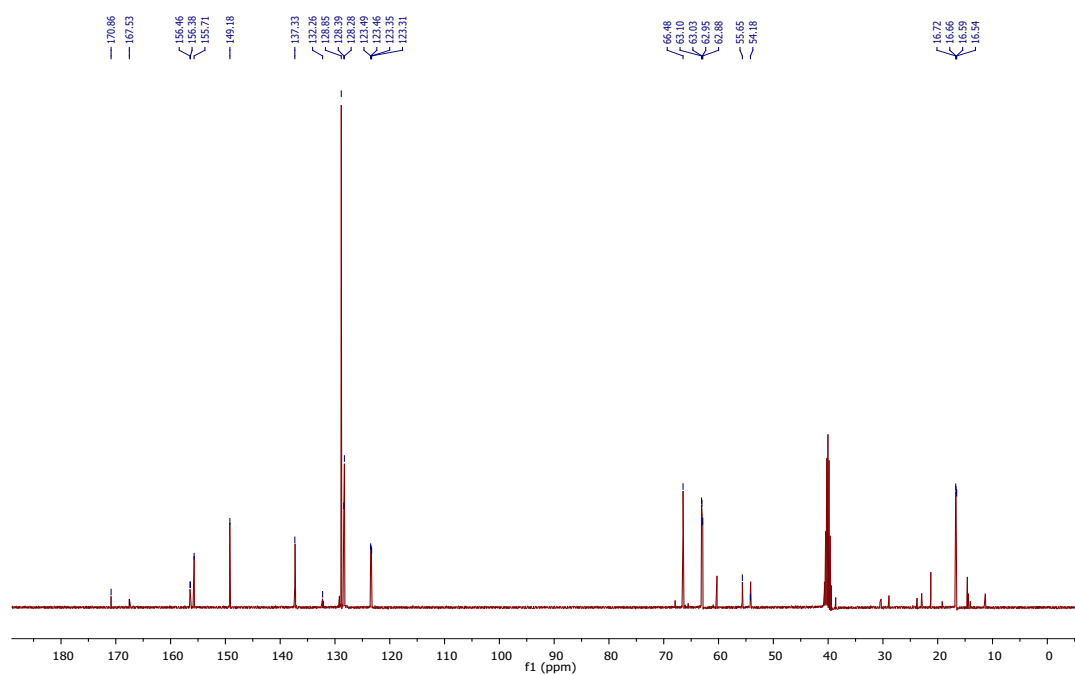

### $^{31}\text{P}$ NMR spectrum of **3n**

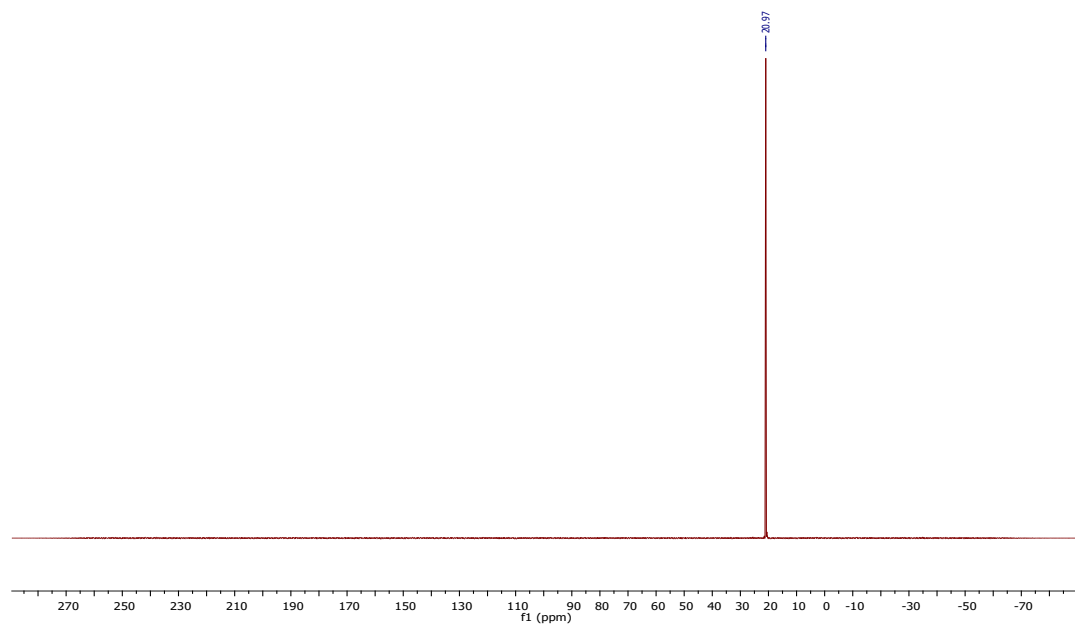

<sup>1</sup>H NMR spectrum of **30**

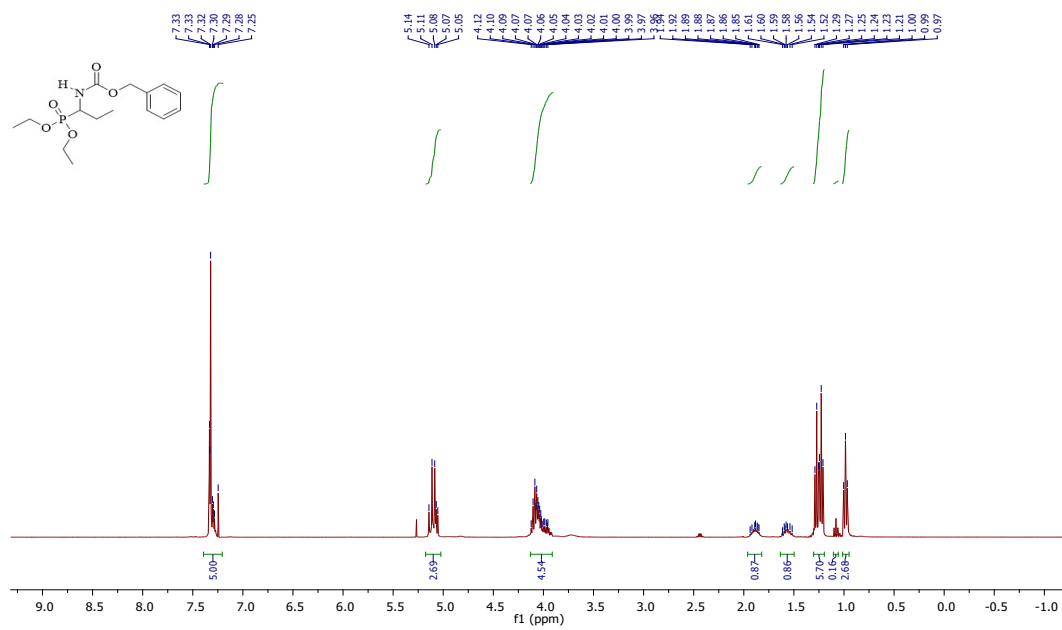

<sup>13</sup>C NMR spectrum of **30**

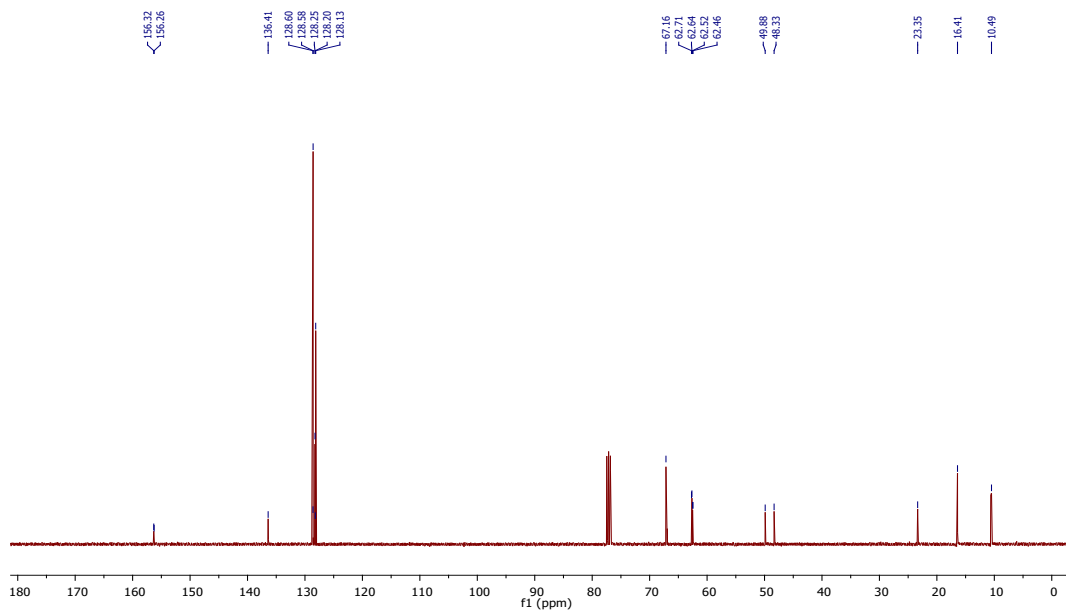

### <sup>31</sup>P NMR spectrum of **3o**

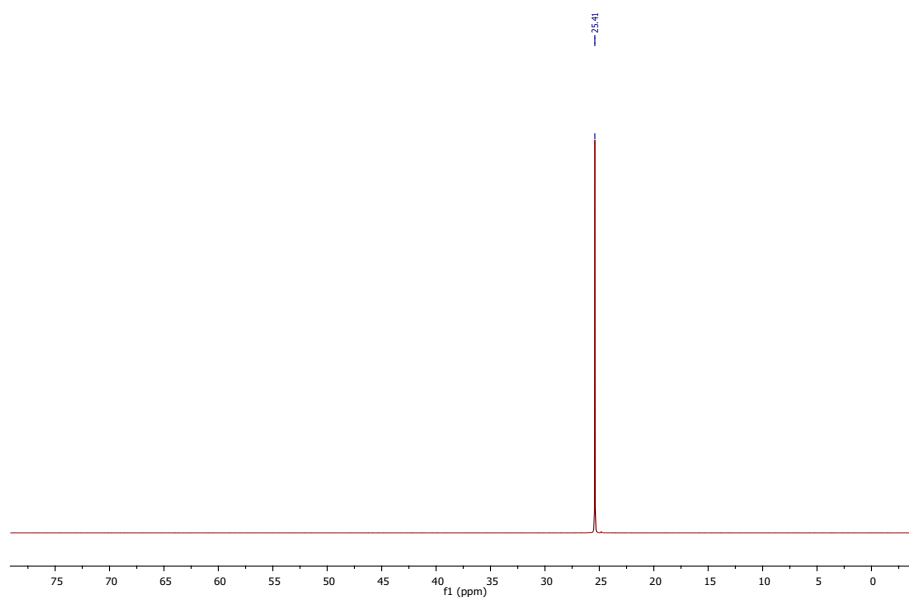

### <sup>1</sup>H NMR spectrum of **3p**

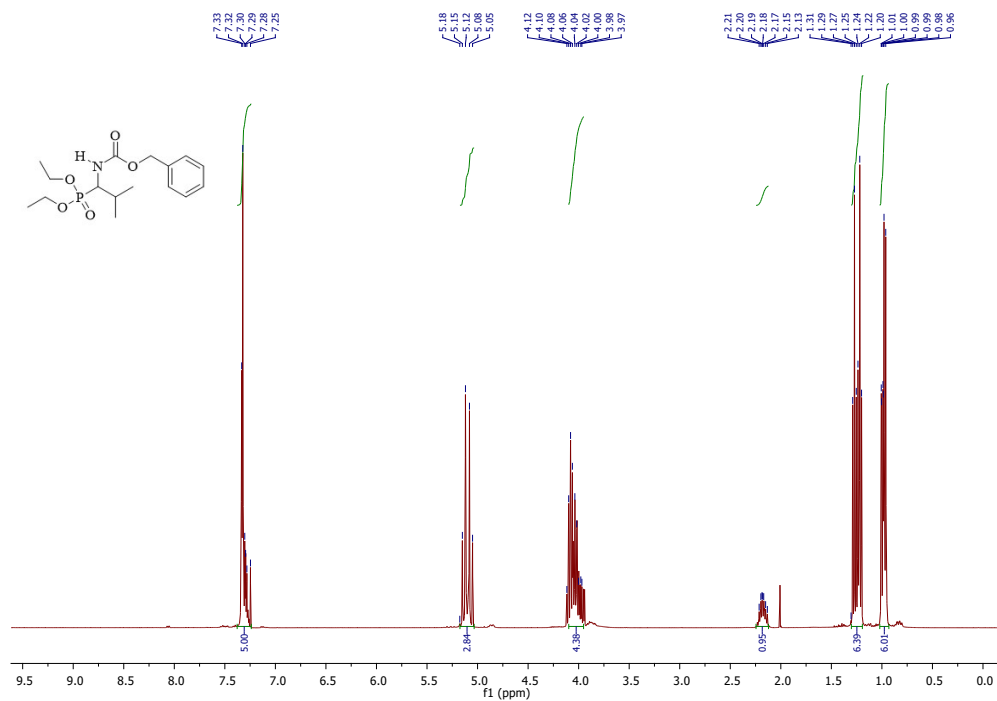

### $^{13}\text{C}$ NMR spectrum of **3p**

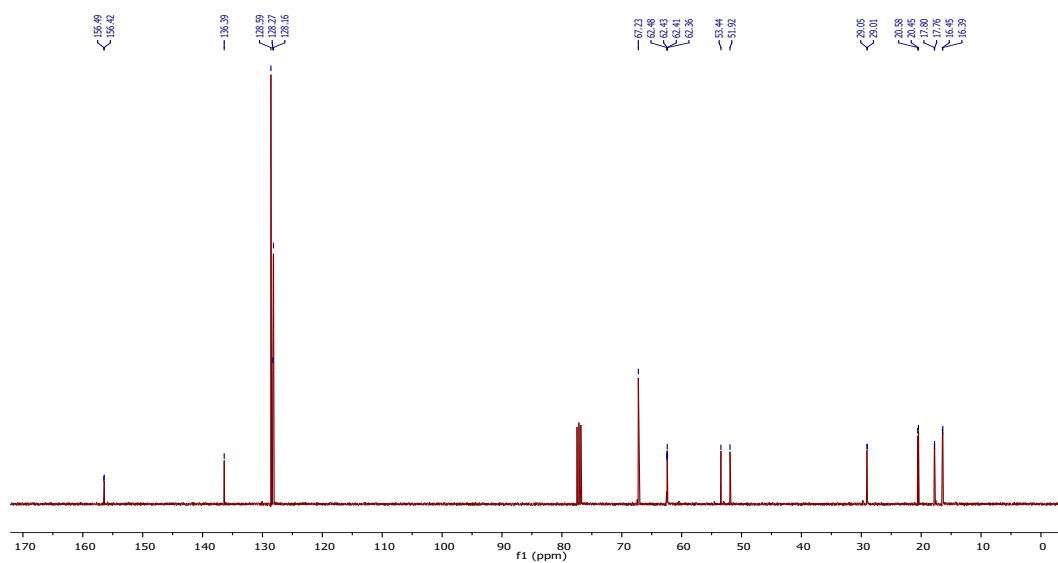

### $^{31}\text{P}$ NMR spectrum of **3p**

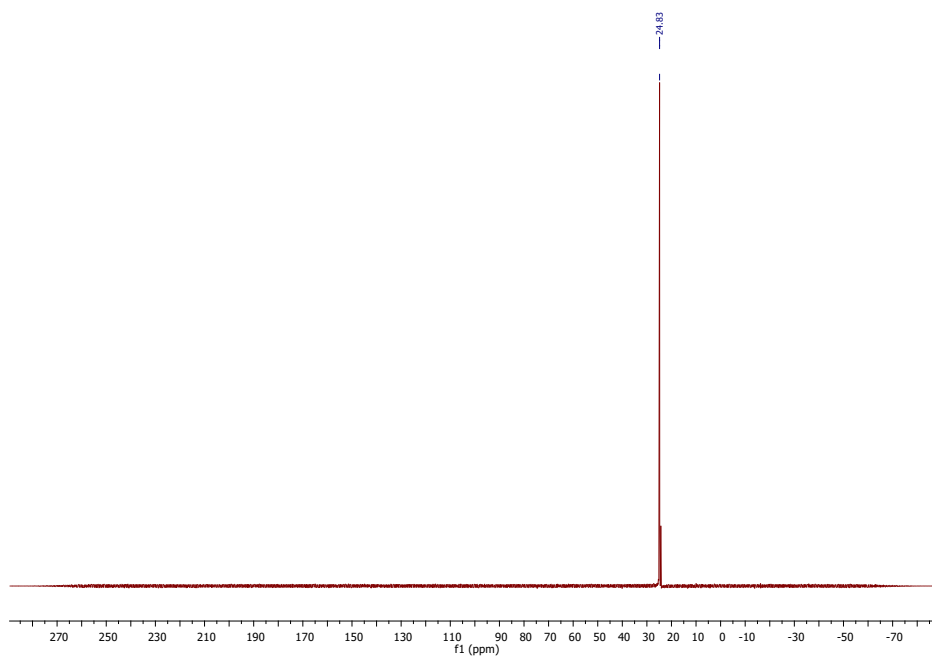



# <sup>1</sup>H NMR spectrum of **3q**

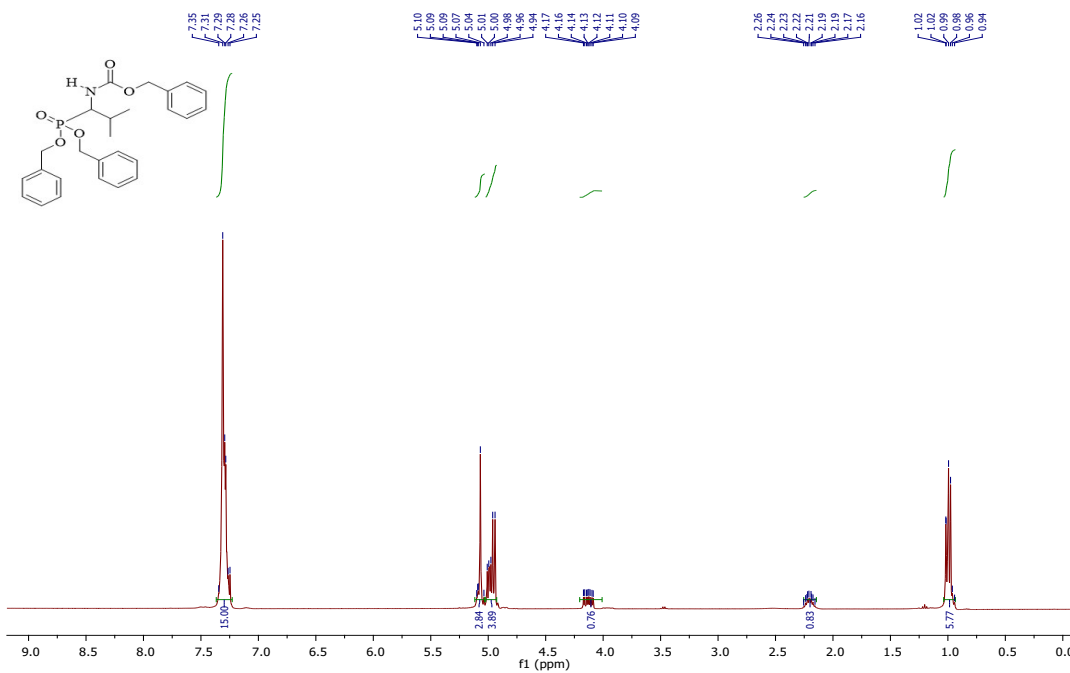

# <sup>13</sup>C NMR spectrum of **3q**

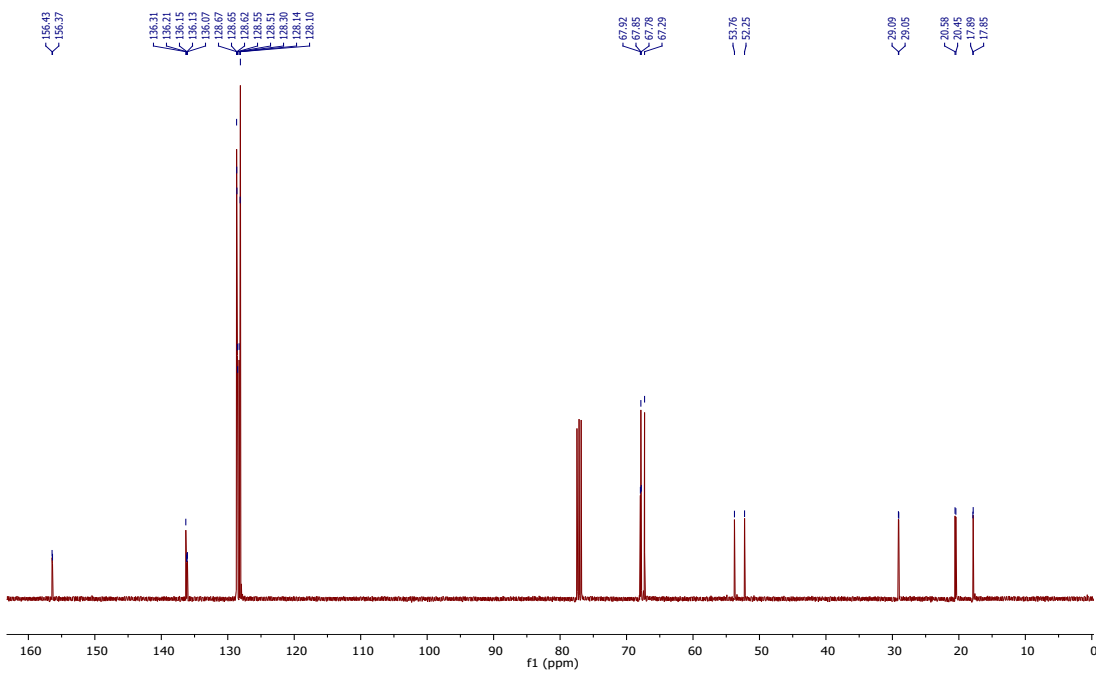

### <sup>31</sup>P NMR spectrum of **3q**

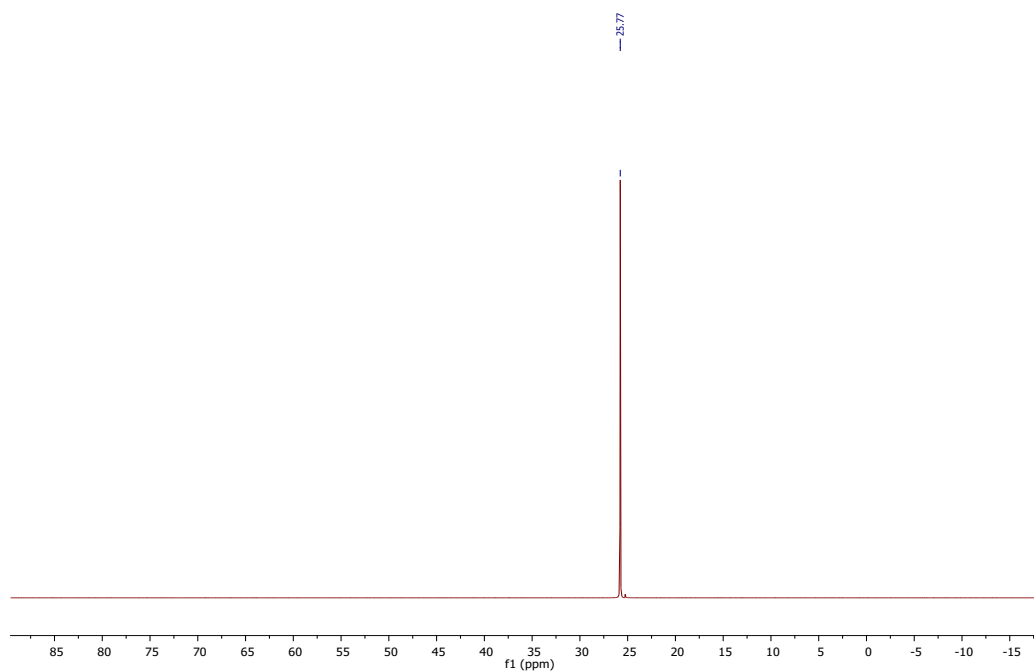

### <sup>1</sup>H NMR spectrum of **3r**

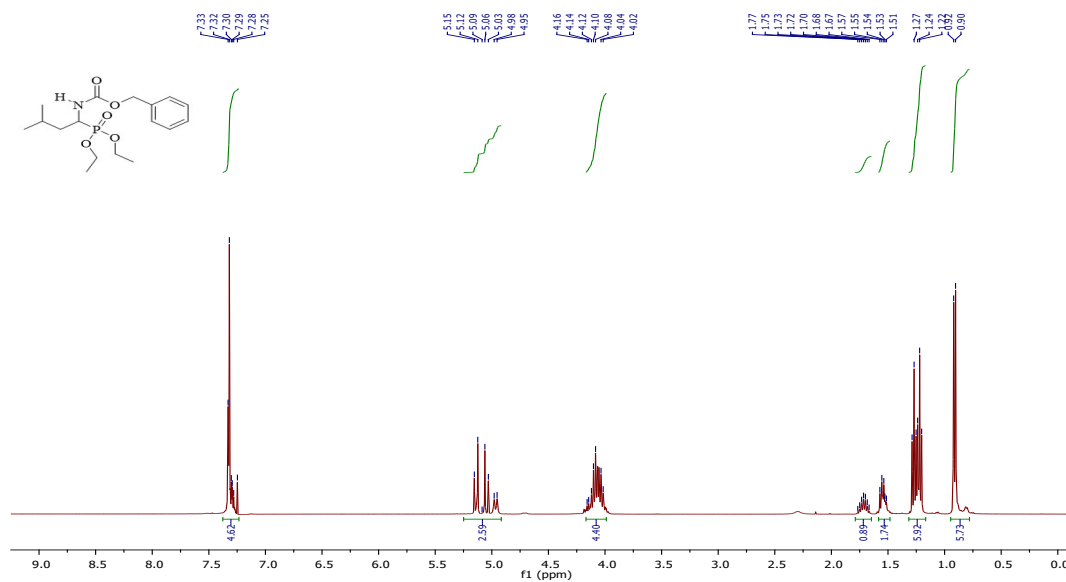

### $^{13}\text{C}$ NMR spectrum of **3r**

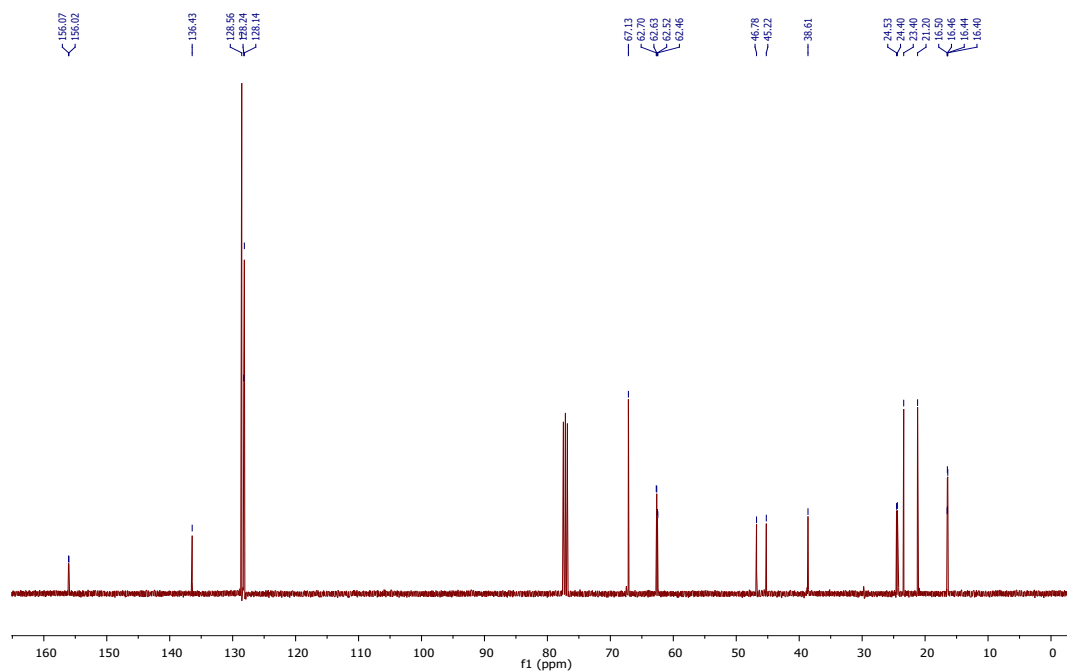

### $^{31}\text{P}$ NMR spectrum of **3r**

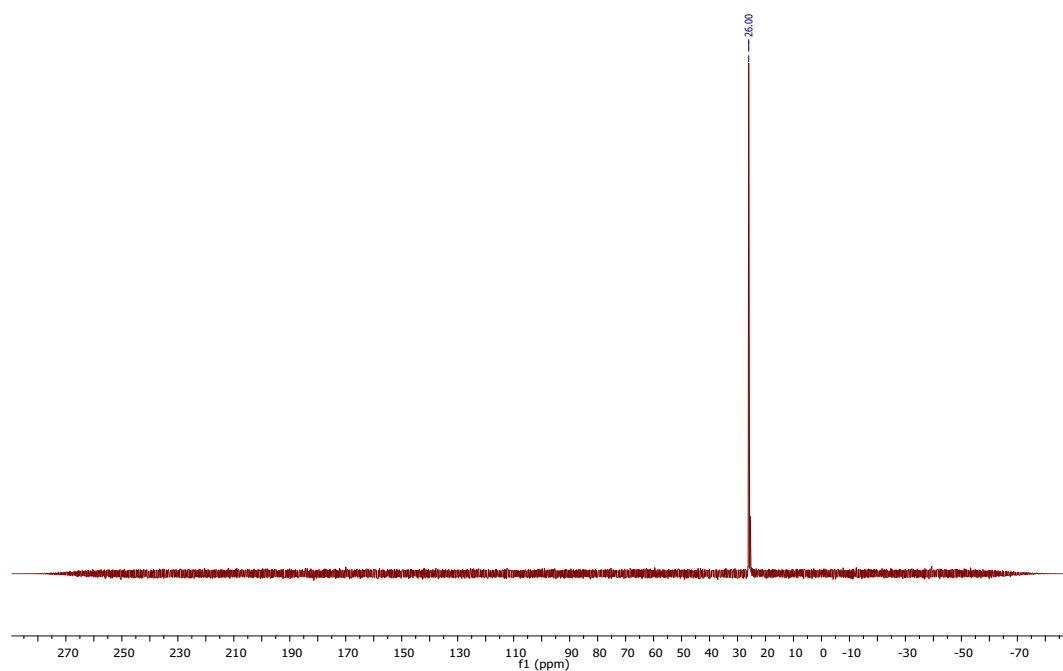

# <sup>1</sup>H NMR spectrum of **8a**

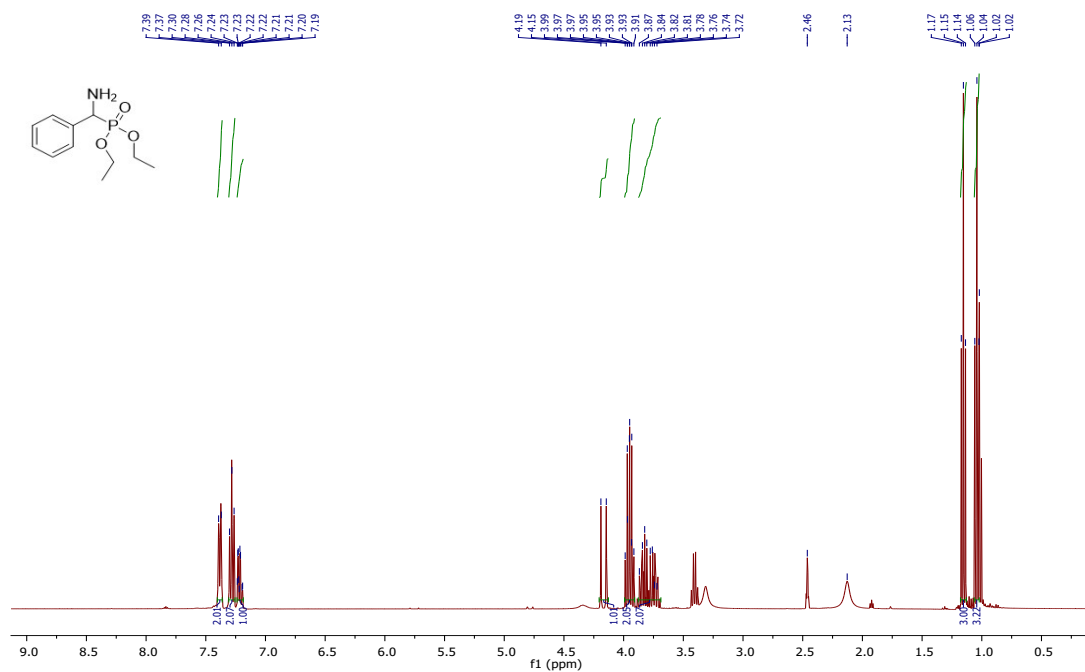

# <sup>13</sup>C NMR spectrum of **8a**

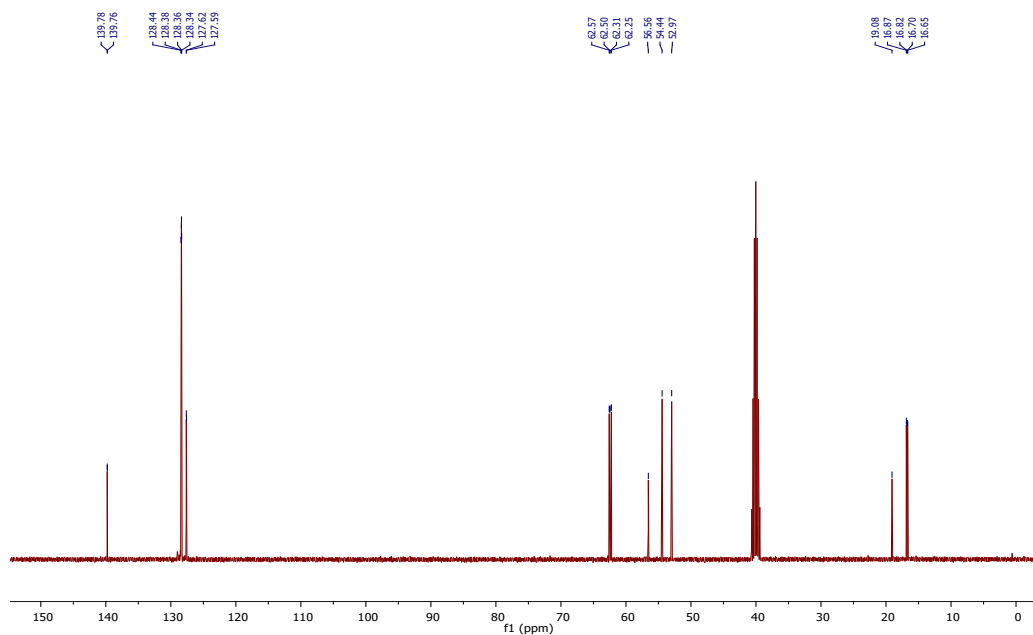

### <sup>31</sup>P NMR spectrum of **8a**

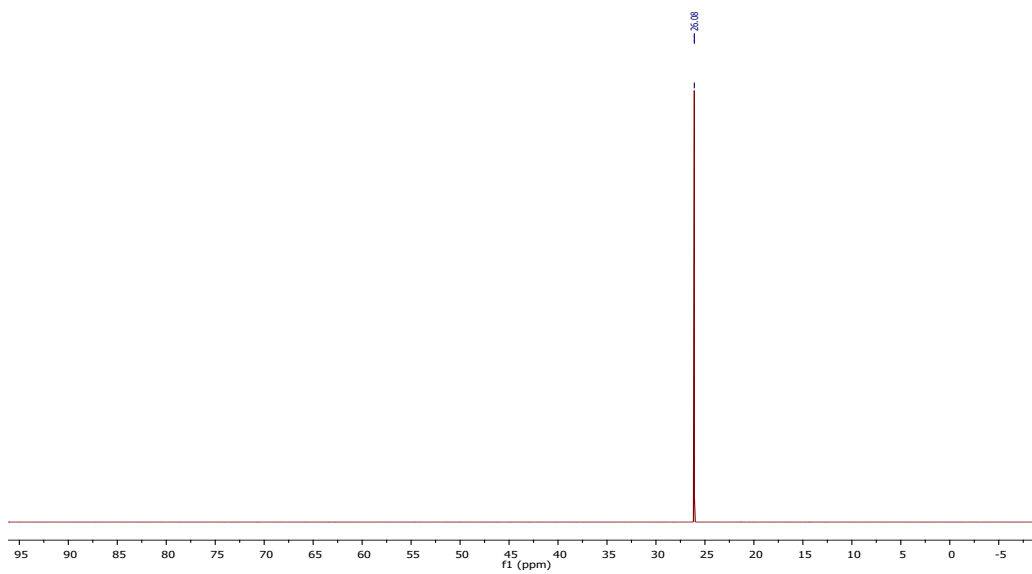

### <sup>1</sup>H NMR spectrum of **8n**

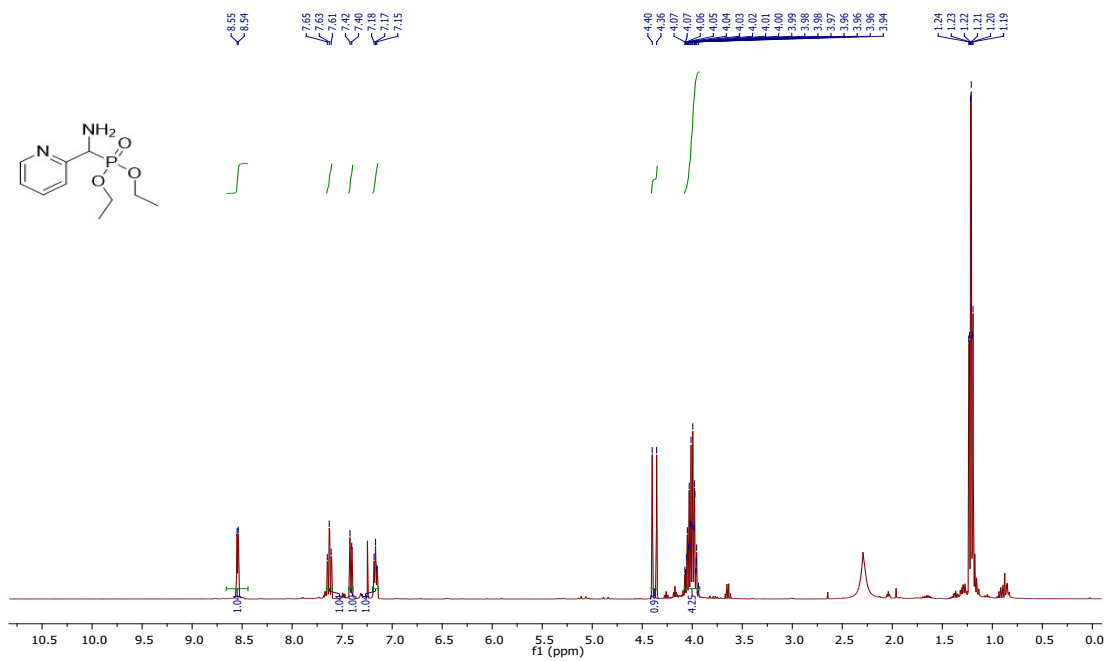

### $^{13}\text{C}$ NMR spectrum of **8n**

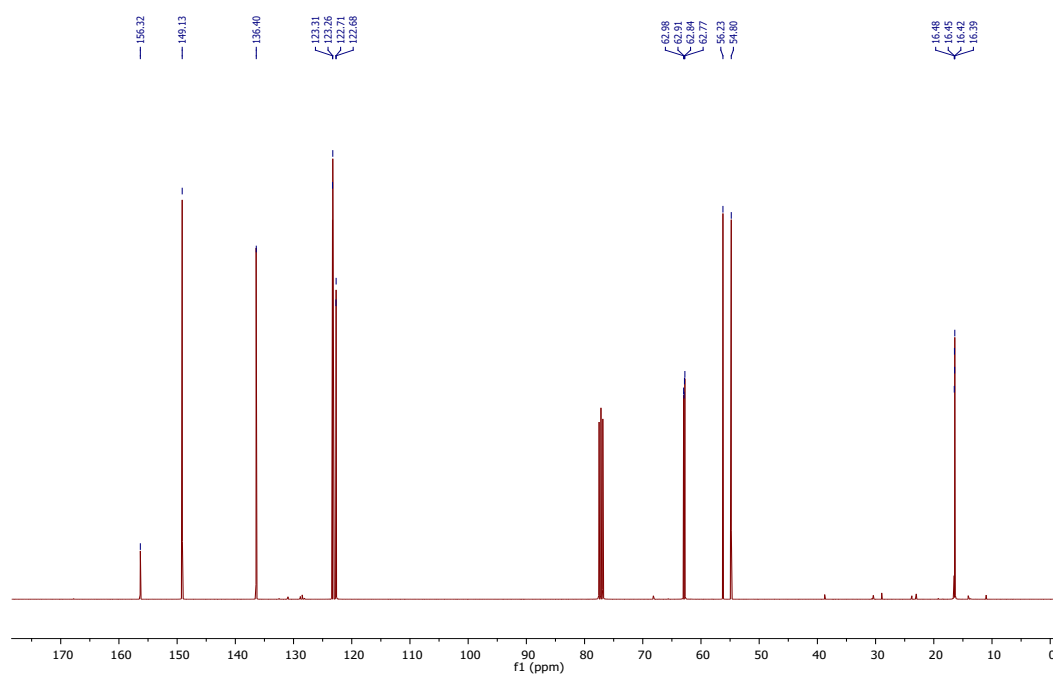

### $^{31}\text{P}$ NMR spectrum of **8n**

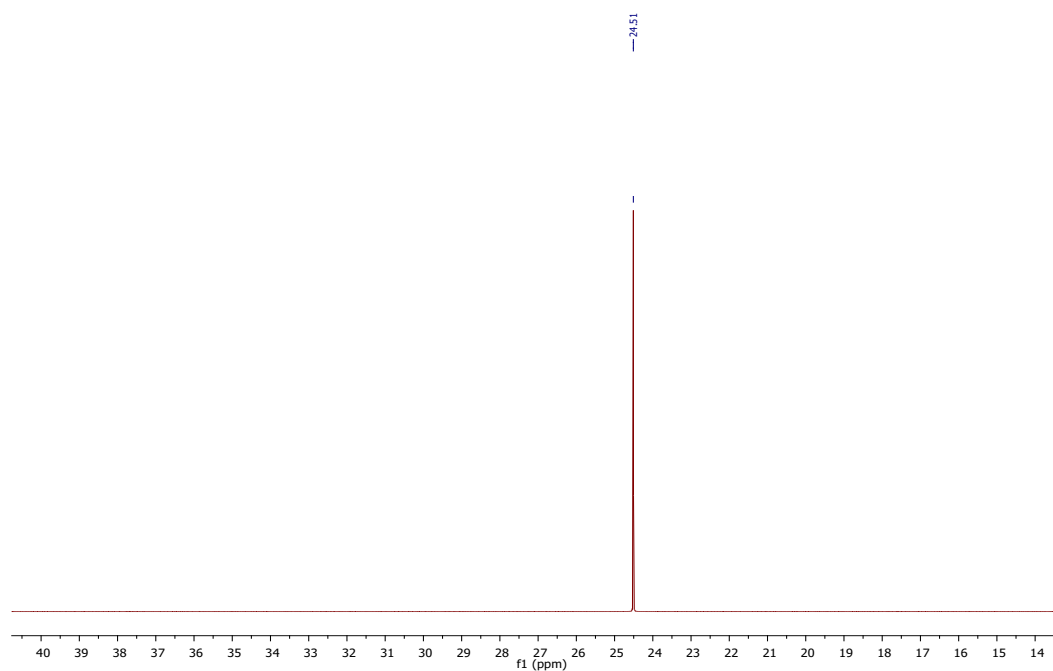

### <sup>1</sup>H NMR Spectrum (*R,R,R*)-6a

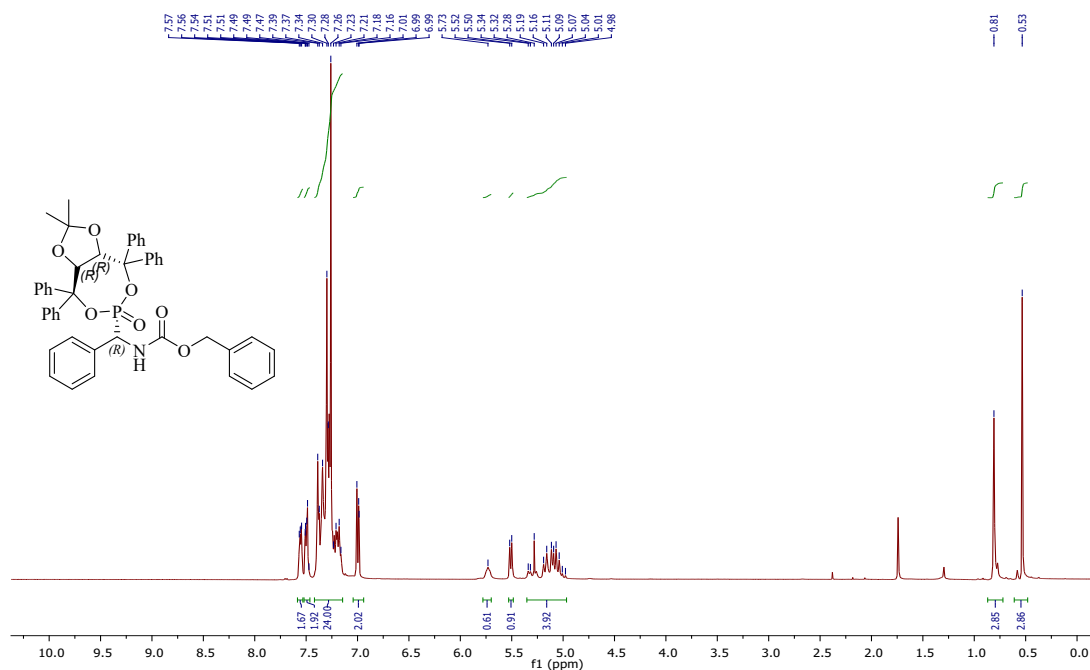

### <sup>13</sup>C NMR Spectrum (*R,R,R*)-6a

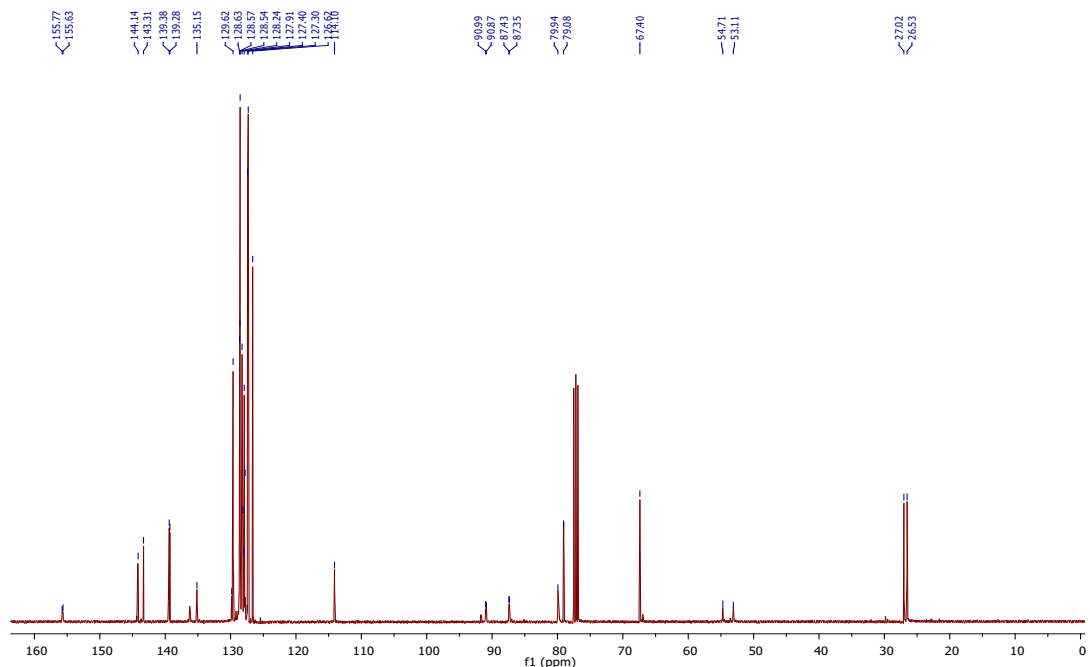

$^{31}\text{P}$  NMR Spectrum (*R,R,R*)- 6a

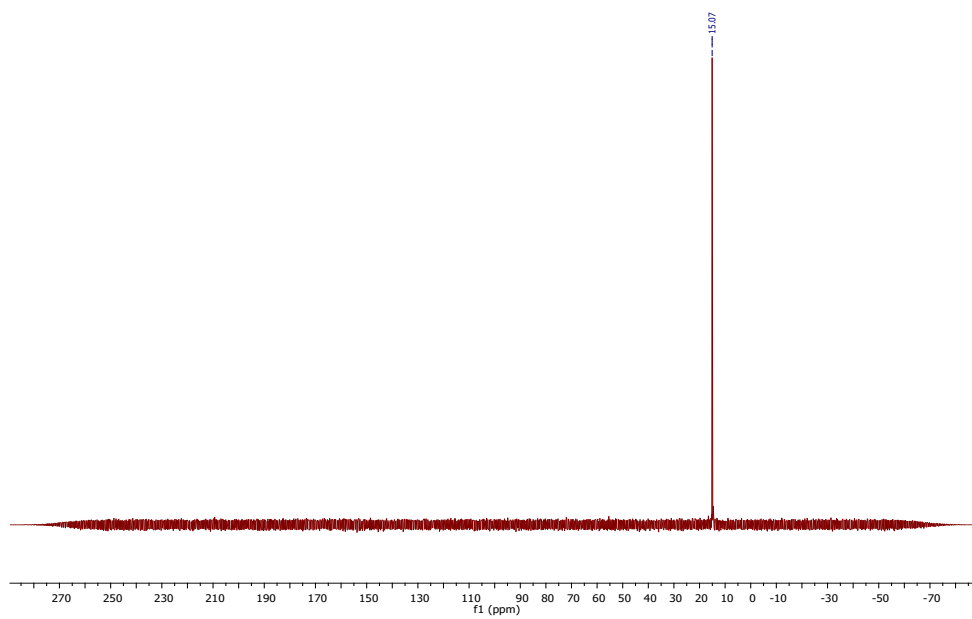

$^1\text{H}$  NMR Spectrum (*S,S,S*)-6a

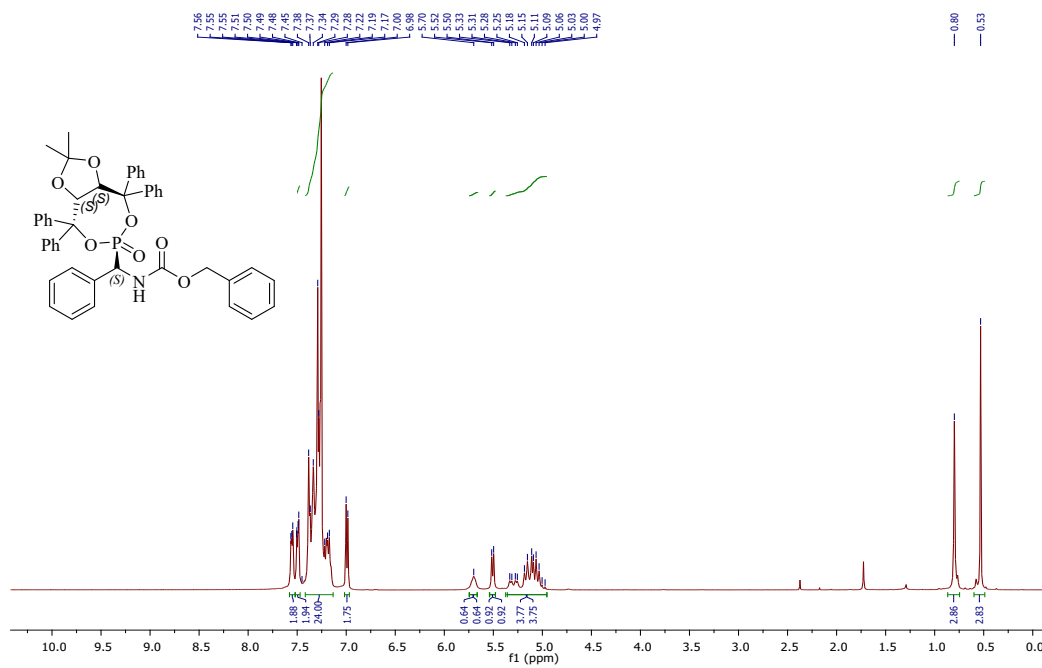



### $^{13}\text{C}$ NMR Spectrum (*S,S,S*)-6a

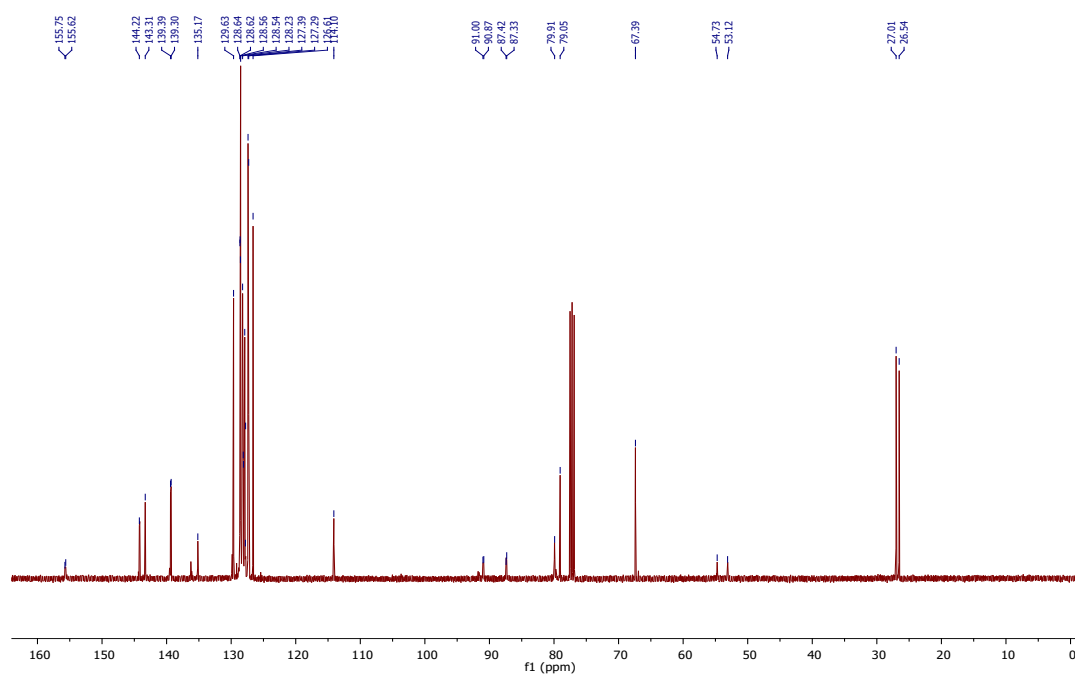

### $^{31}\text{P}$ NMR Spectrum (*S,S,S*)-6a

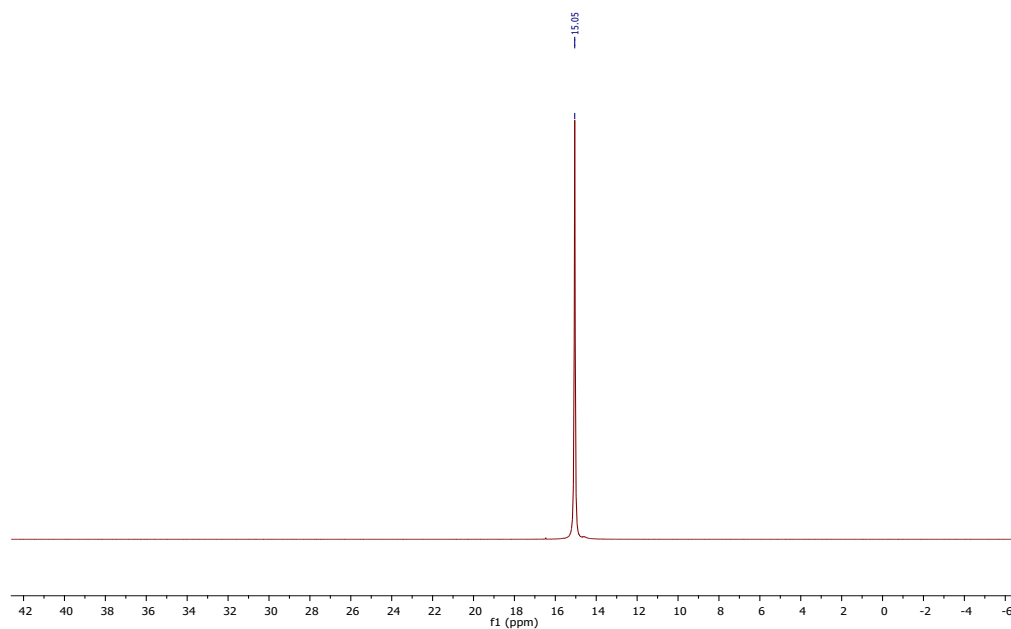

<sup>1</sup>H NMR Spectrum (*R,R,R*)-6b

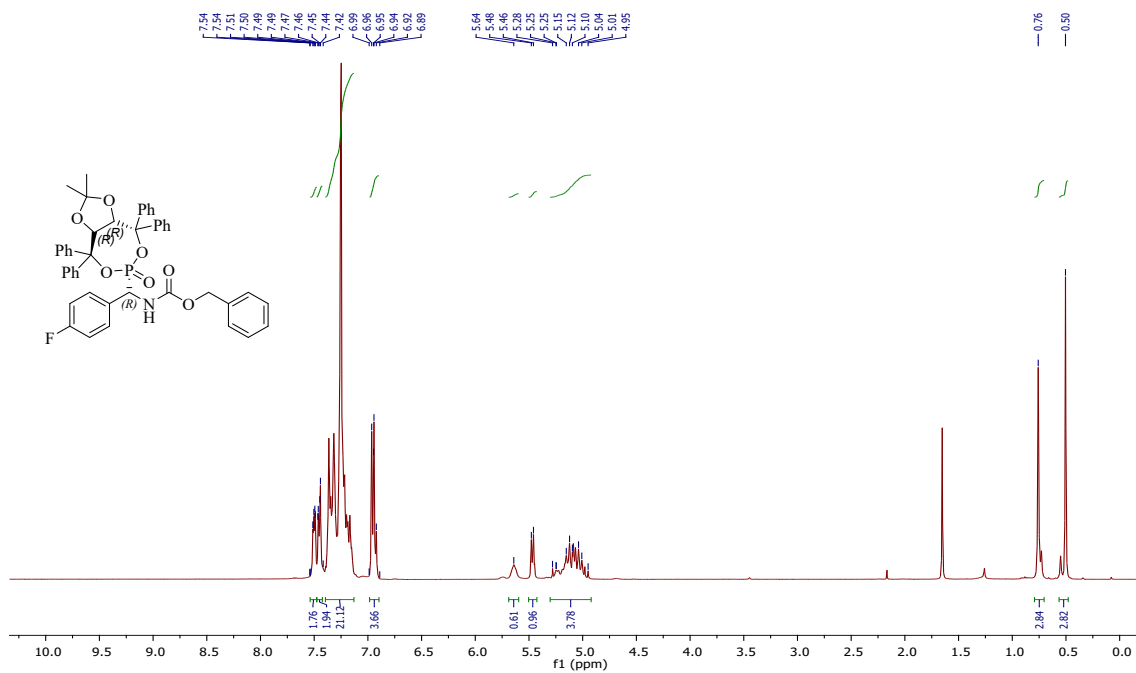

<sup>13</sup>C NMR Spectrum (*R,R,R*)-6b

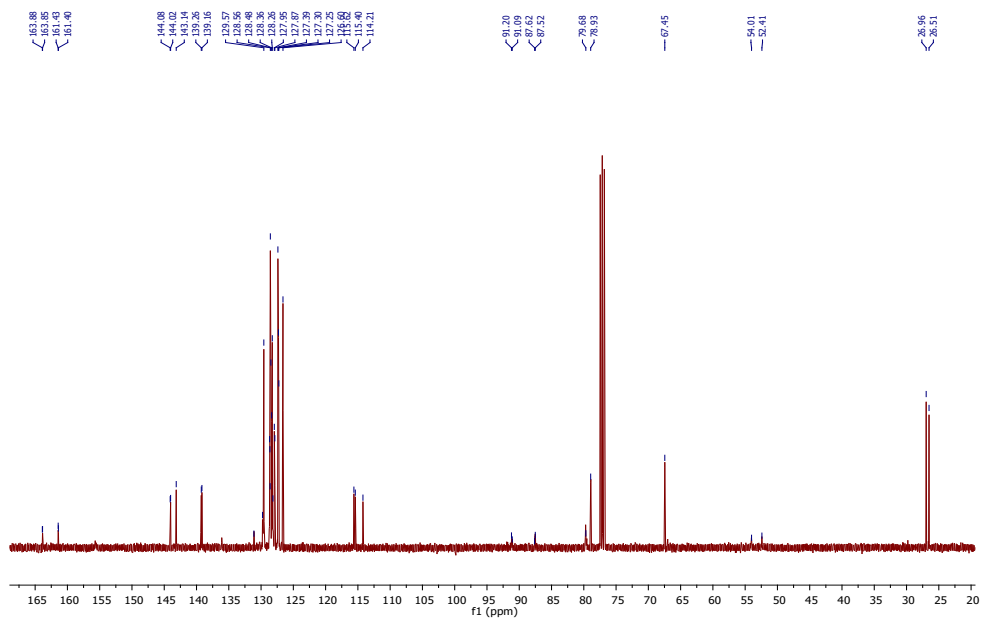

<sup>31</sup>P NMR Spectrum (*R,R,R*)-6b

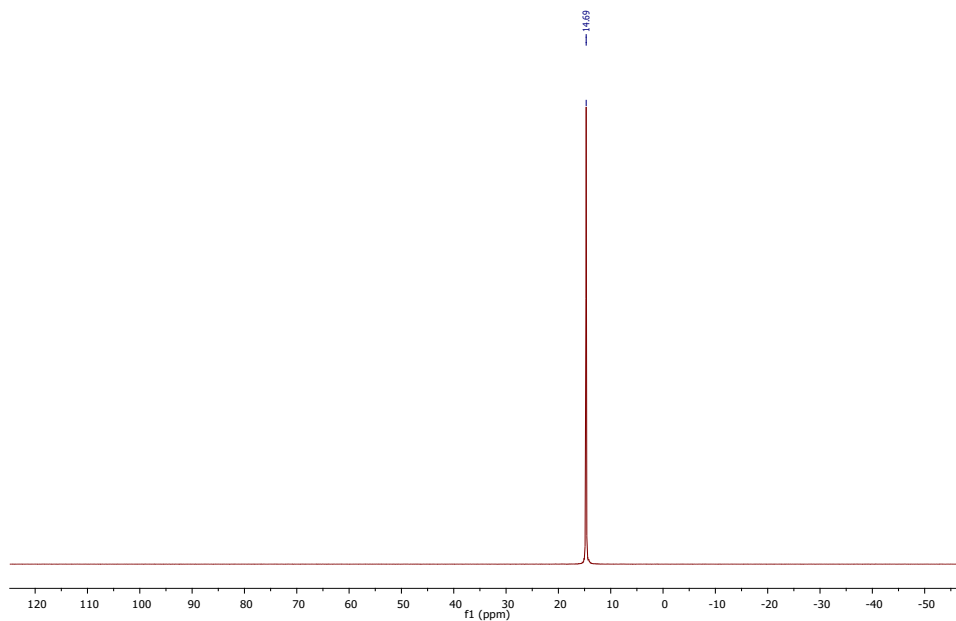

<sup>1</sup>H NMR Spectrum (*S,S,S*)-6b

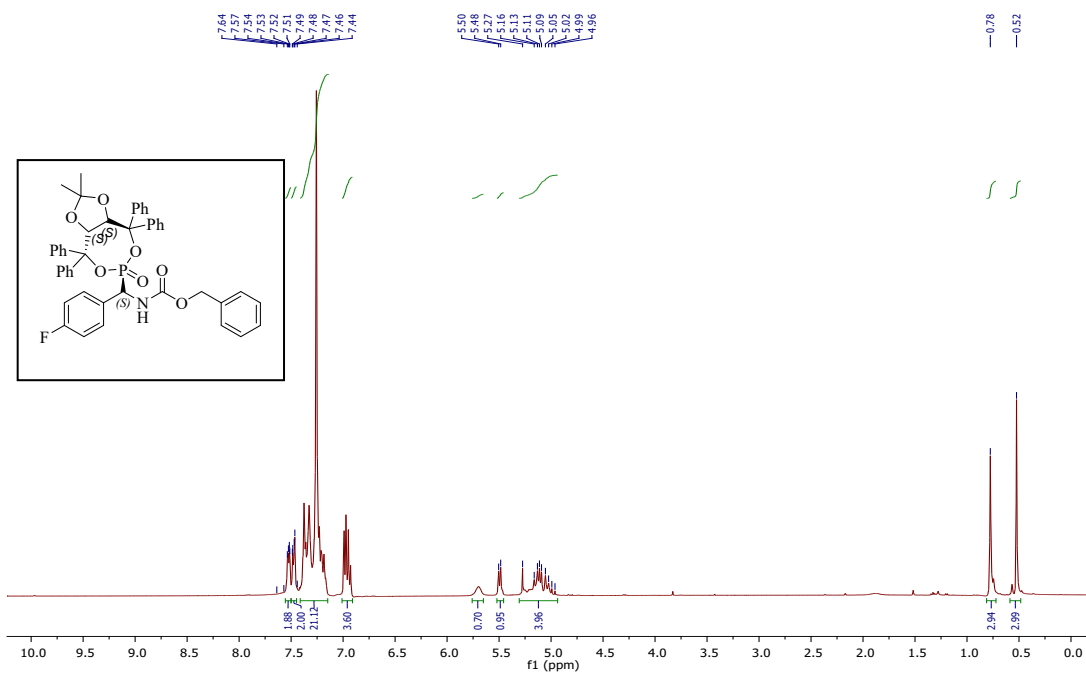

### $^{13}\text{C}$ NMR Spectrum (*S,S,S*)-6b

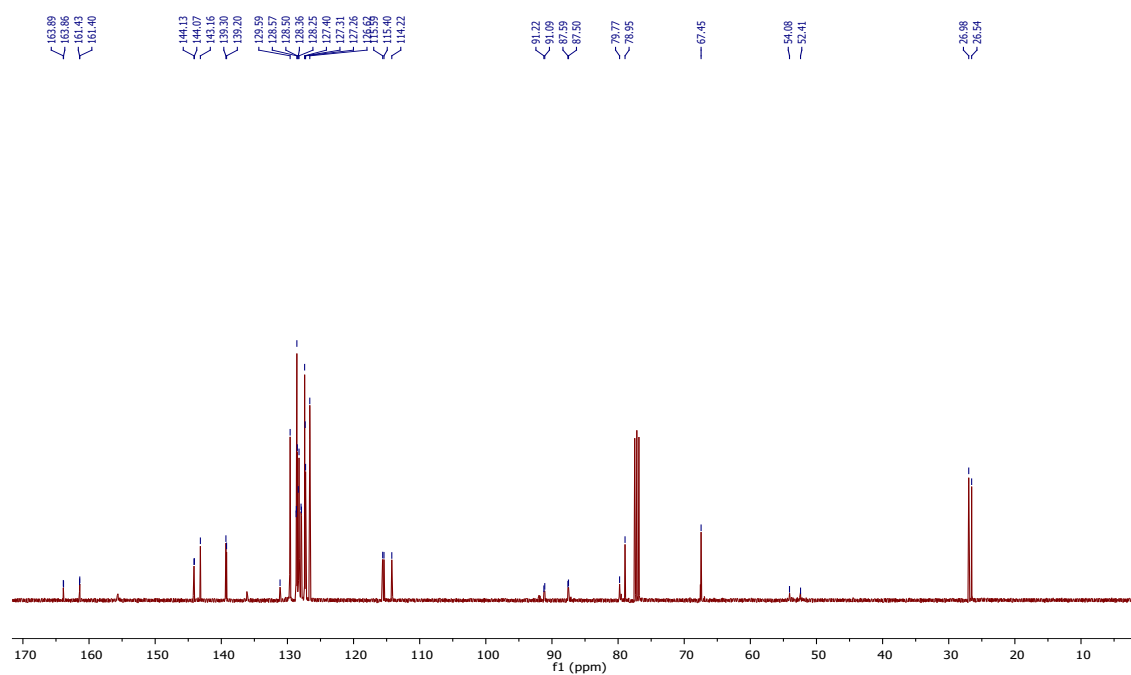

### $^{31}\text{P}$ NMR Spectrum (*S,S,S*)-6b

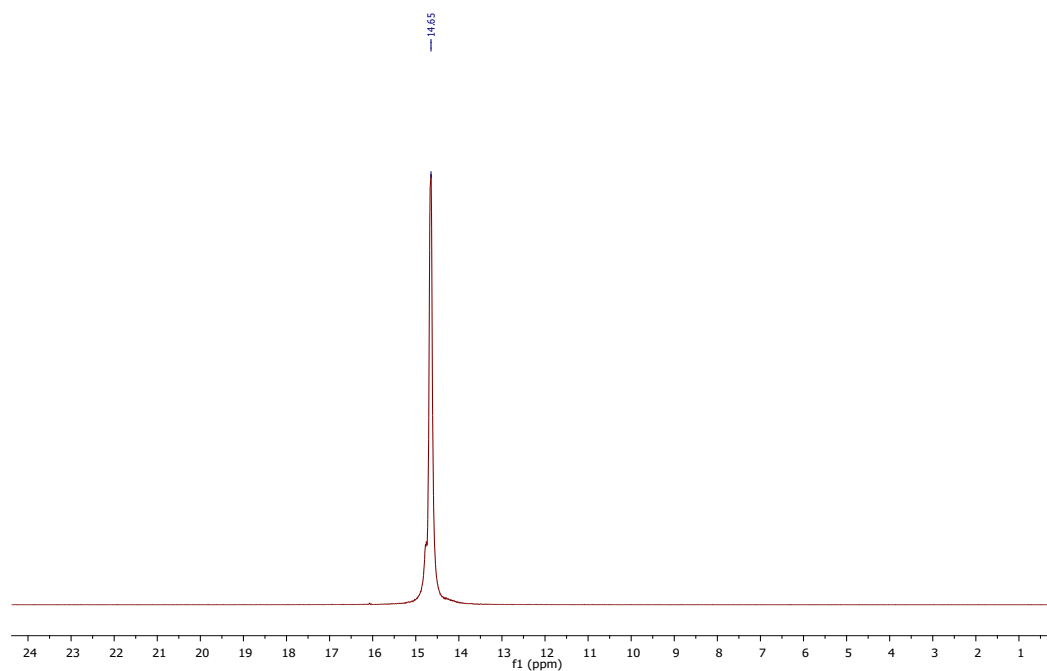

### <sup>1</sup>H NMR Spectrum (*R,R,R*)-6c

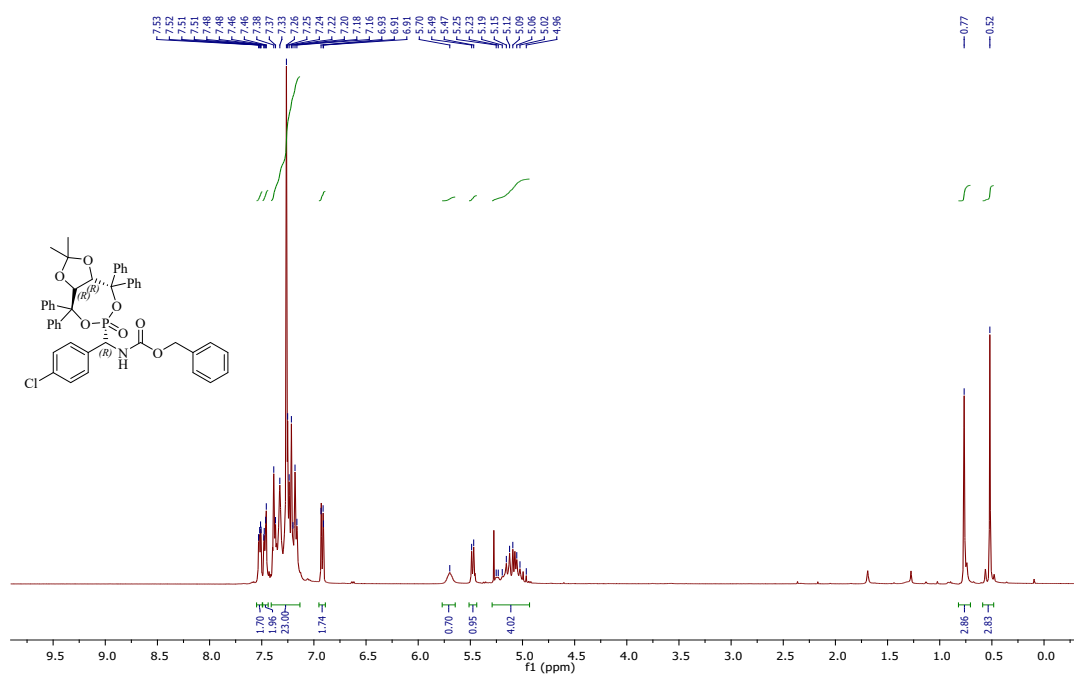

### <sup>13</sup>C NMR Spectrum (*R,R,R*)-6c

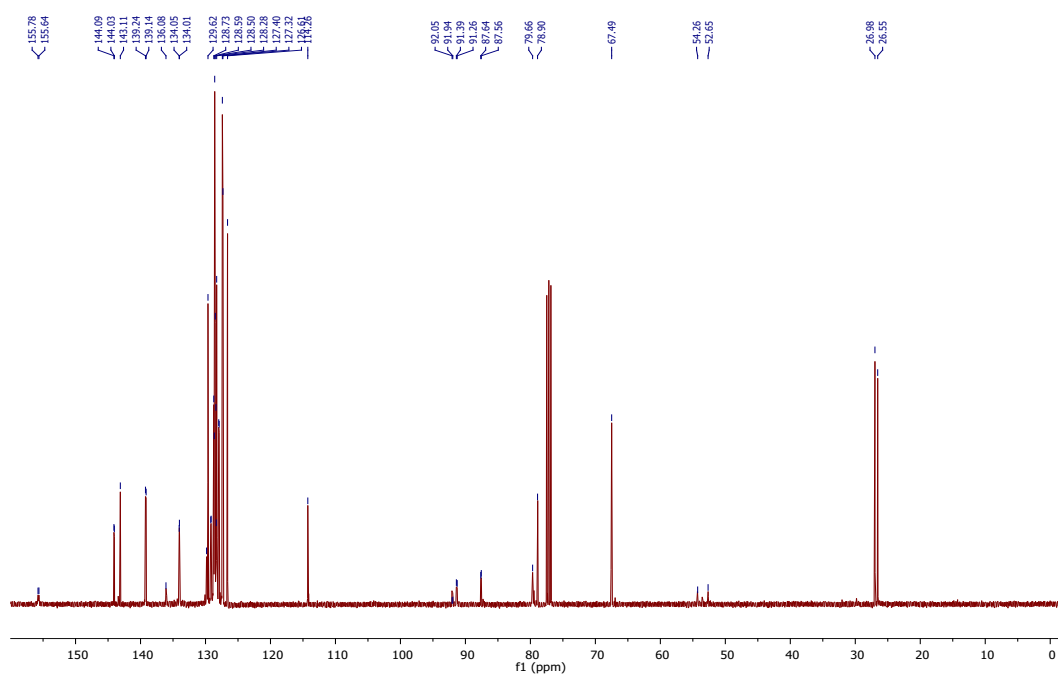

<sup>31</sup>P NMR Spectrum (*R,R,R*)-6c

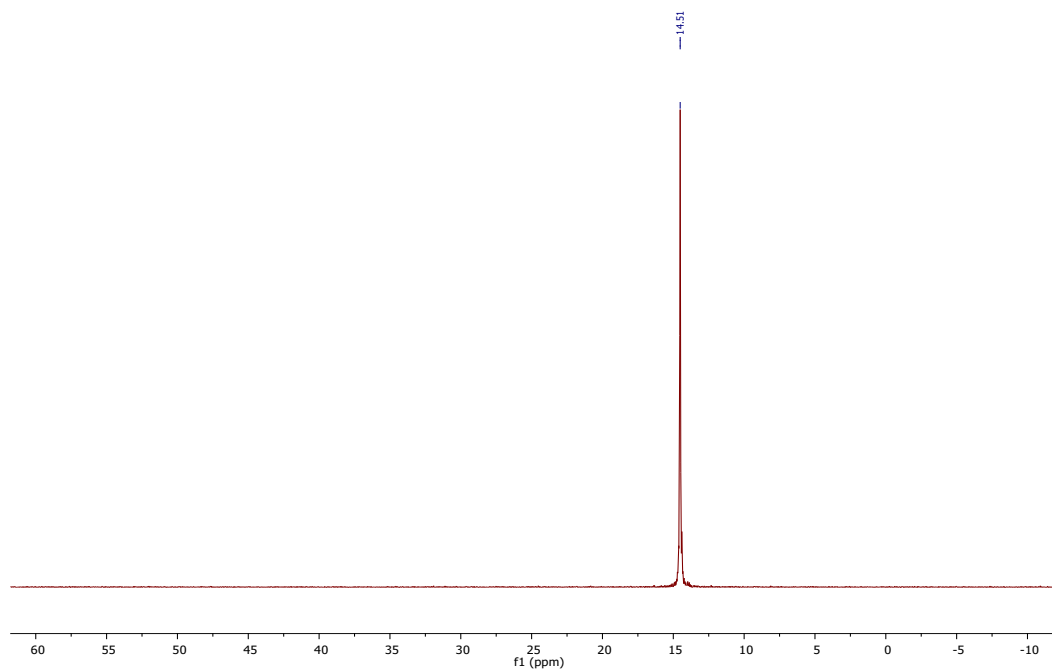

<sup>1</sup>H NMR Spectrum (*R,R,R*)-6d

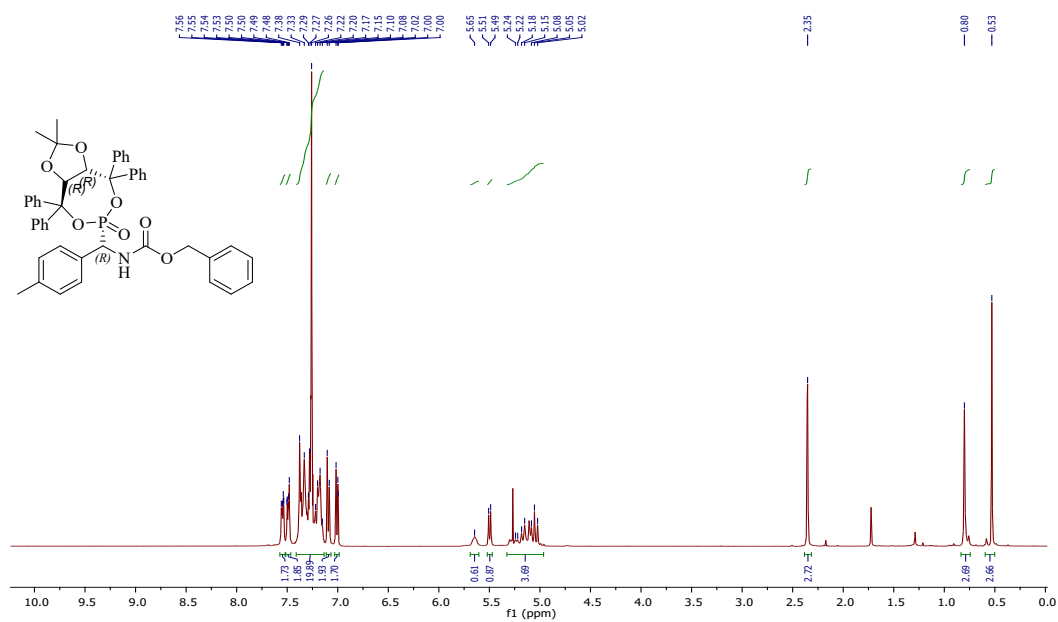

### $^{13}\text{C}$ NMR Spectrum (*R,R,R*)-6d

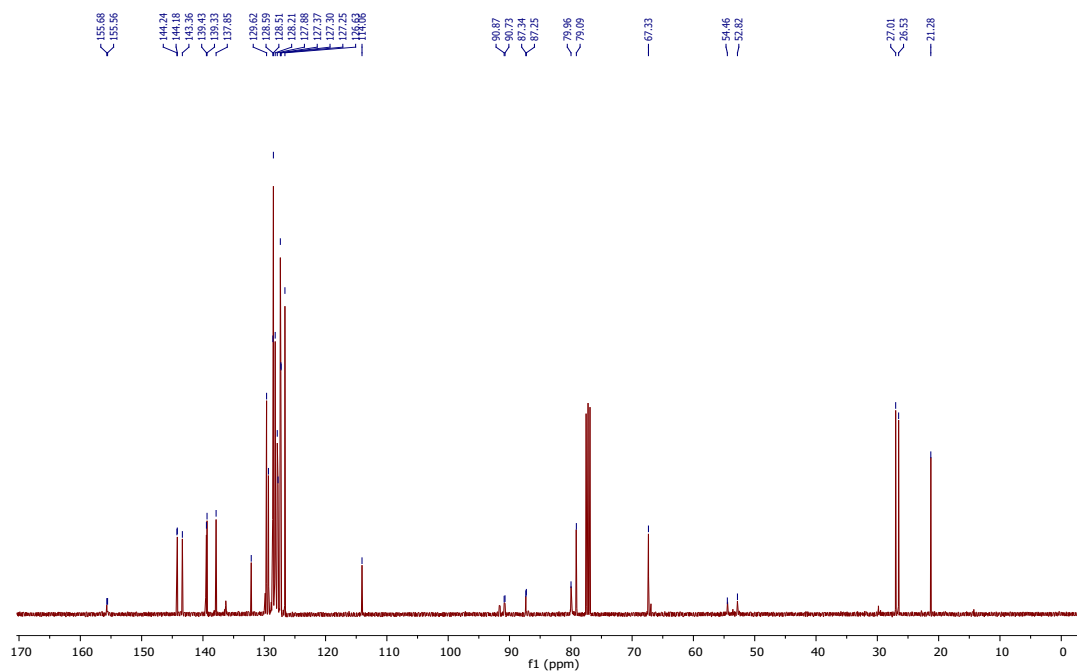

### $^{31}\text{P}$ NMR Spectrum (*R,R,R*)-6d

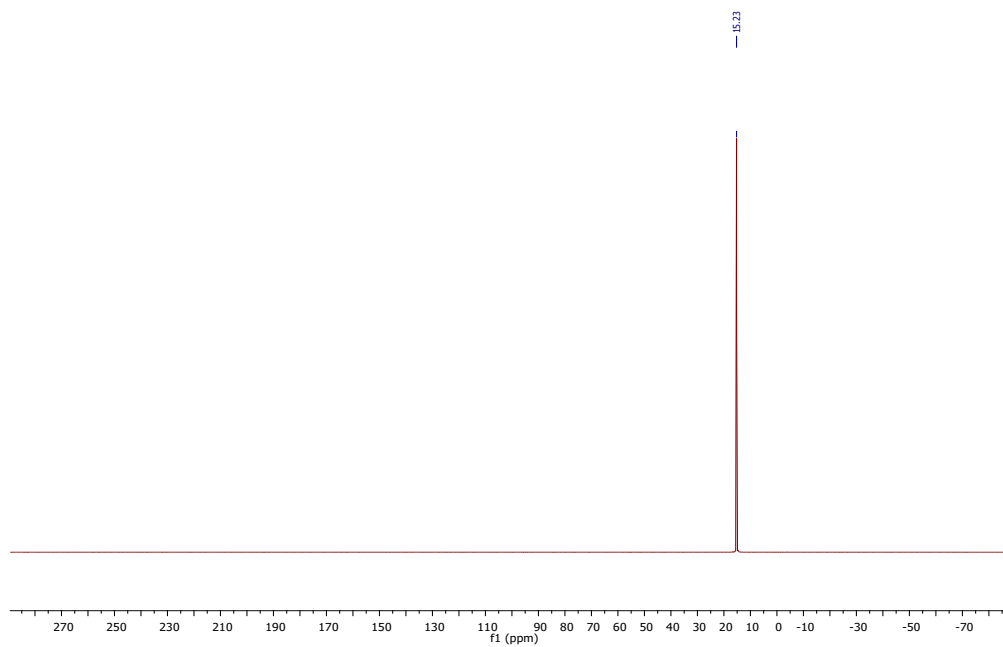

# <sup>1</sup>H NMR Spectrum (*S,S,S*)-6d

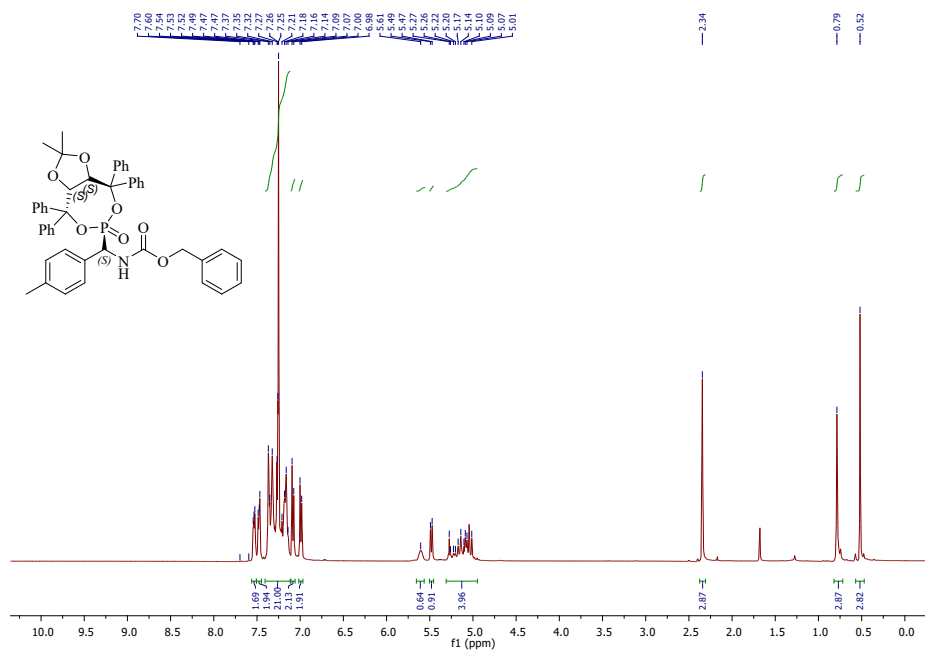

# <sup>13</sup>C NMR Spectrum (*S,S,S*)-6d

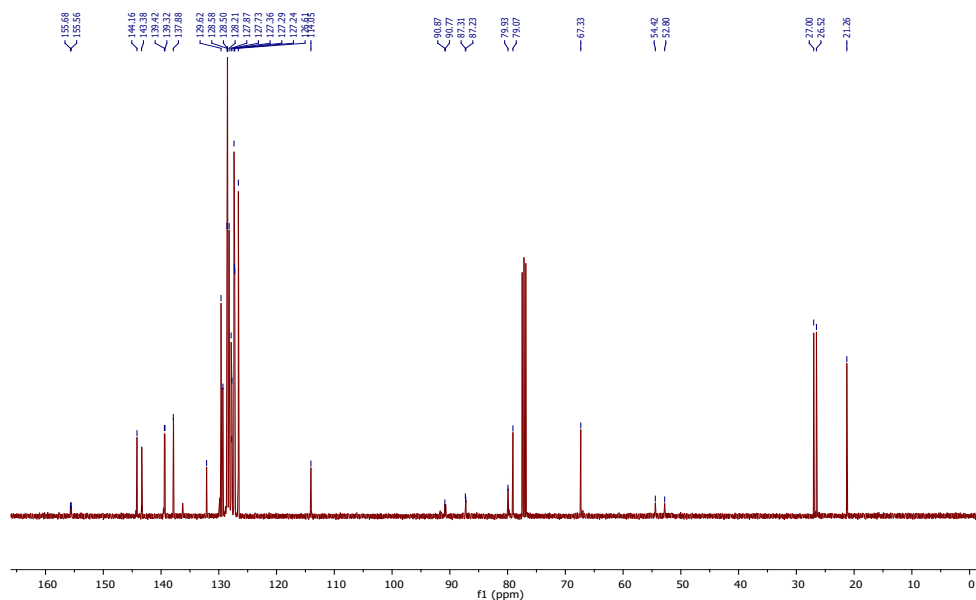



### $^{31}\text{P}$ NMR Spectrum (*S,S,S*)-6d

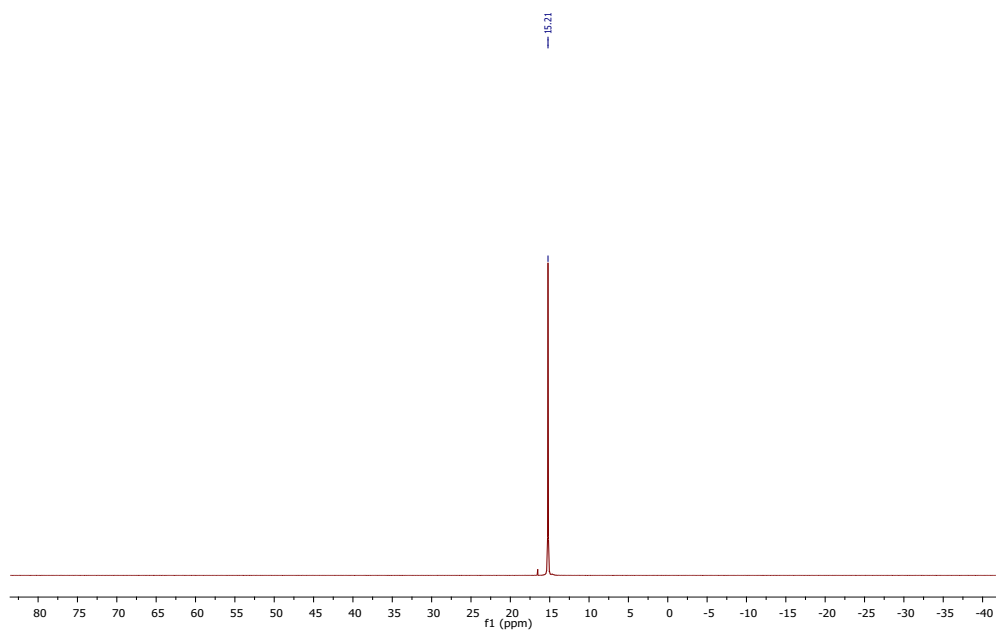

### $^1\text{H}$ NMR Spectrum (*R,R,R*)-6e

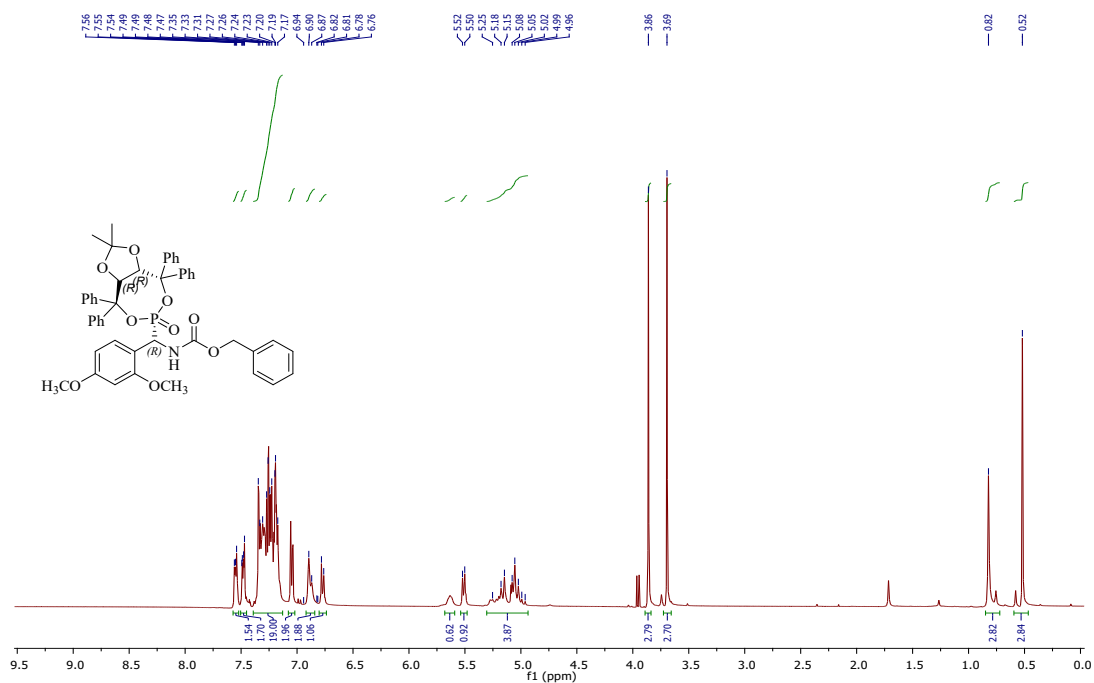

### $^{13}\text{C}$ NMR Spectrum (*R,R,R*)-6e

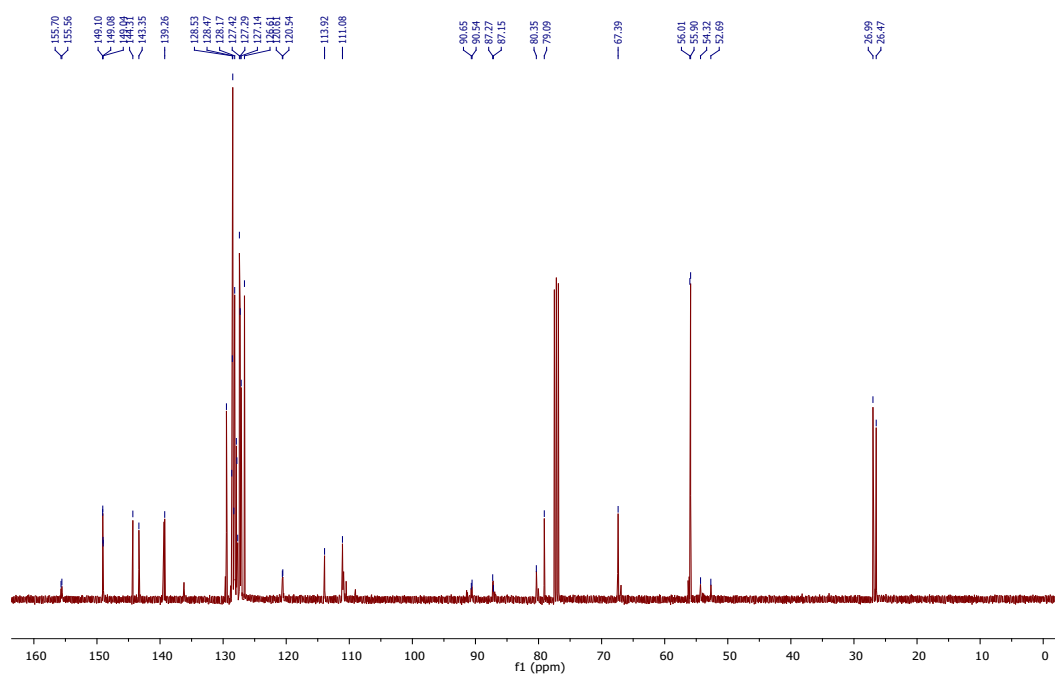

### $^{31}\text{P}$ NMR Spectrum (*R,R,R*)-6e

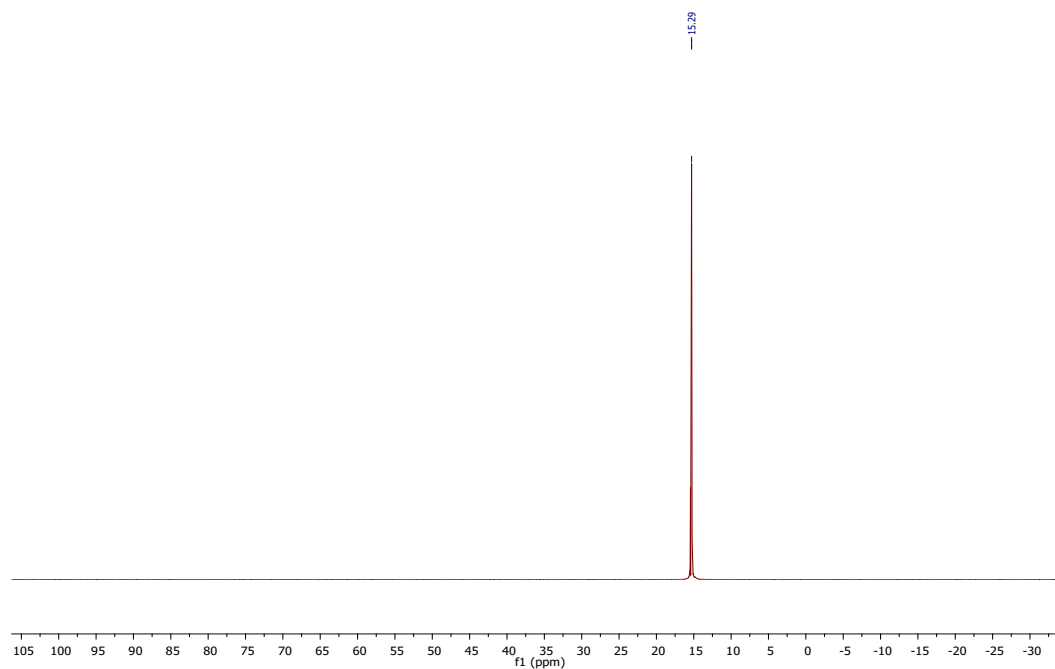

<sup>1</sup>H NMR Spectrum (*R,R,R*)-6f

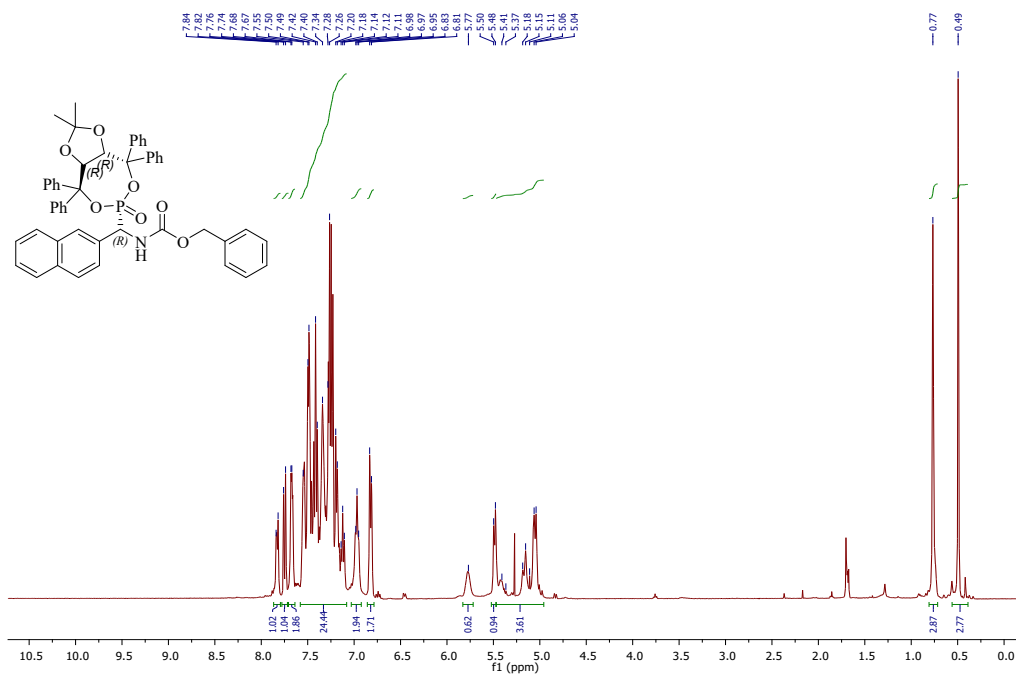

<sup>13</sup>C NMR Spectrum (*R,R,R*)-6f

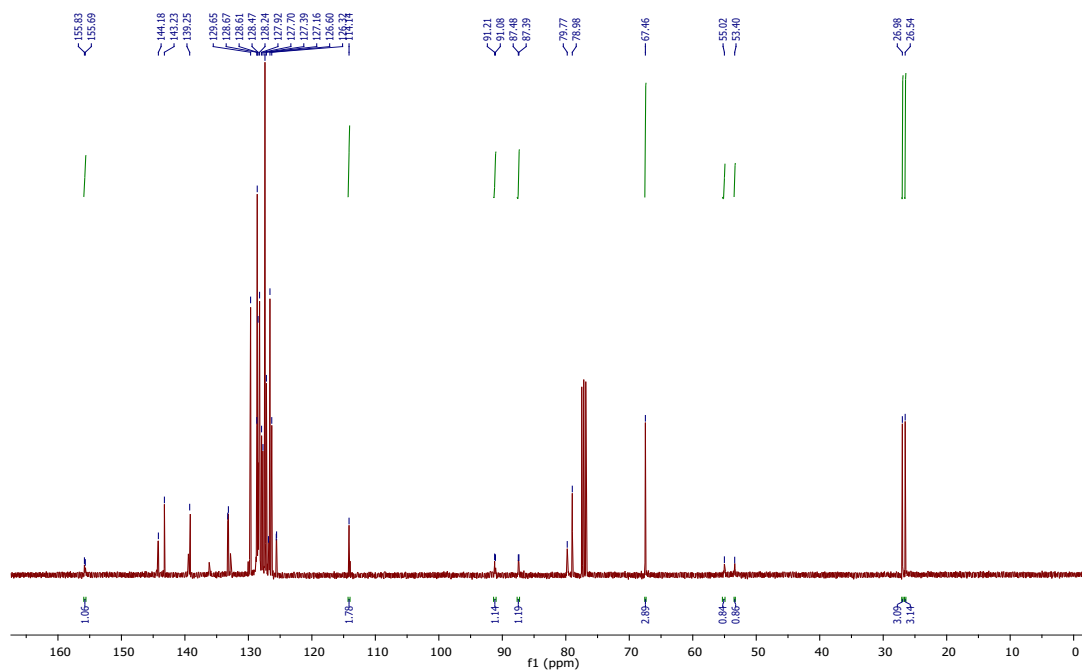

### $^{31}\text{P}$ NMR Spectrum (*R,R,R*)-6f

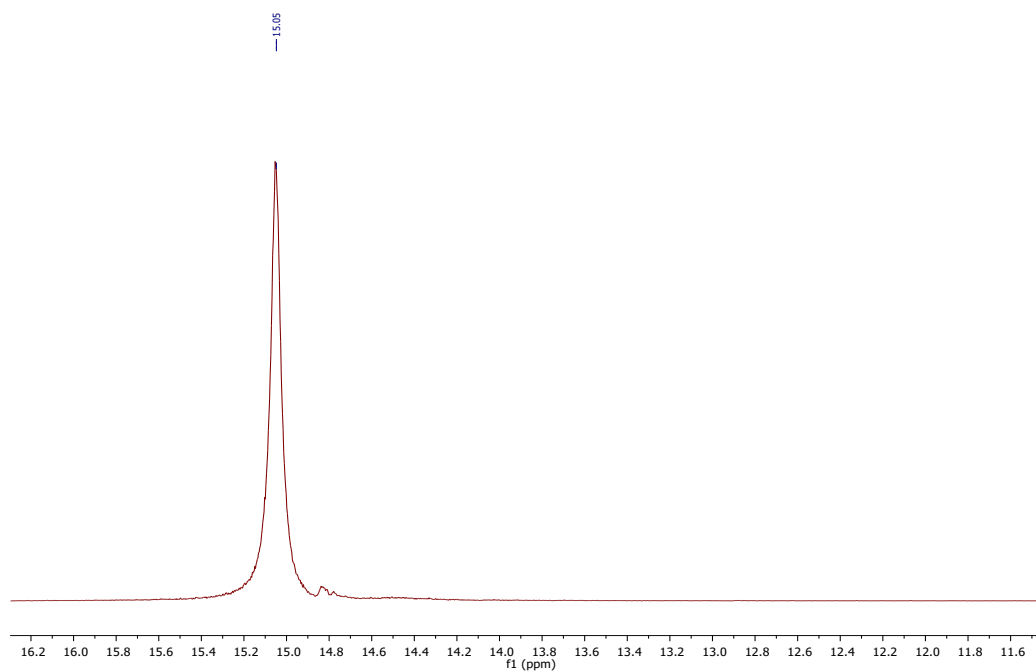

### $^1\text{H}$ NMR Spectrum 6g

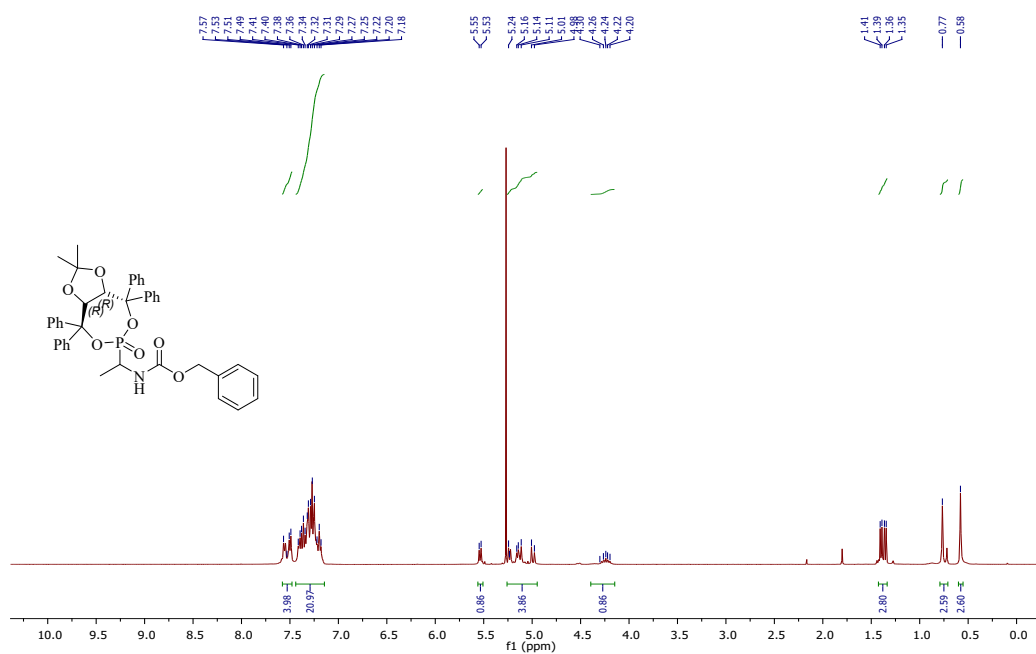

### <sup>13</sup>C NMR Spectrum 6g

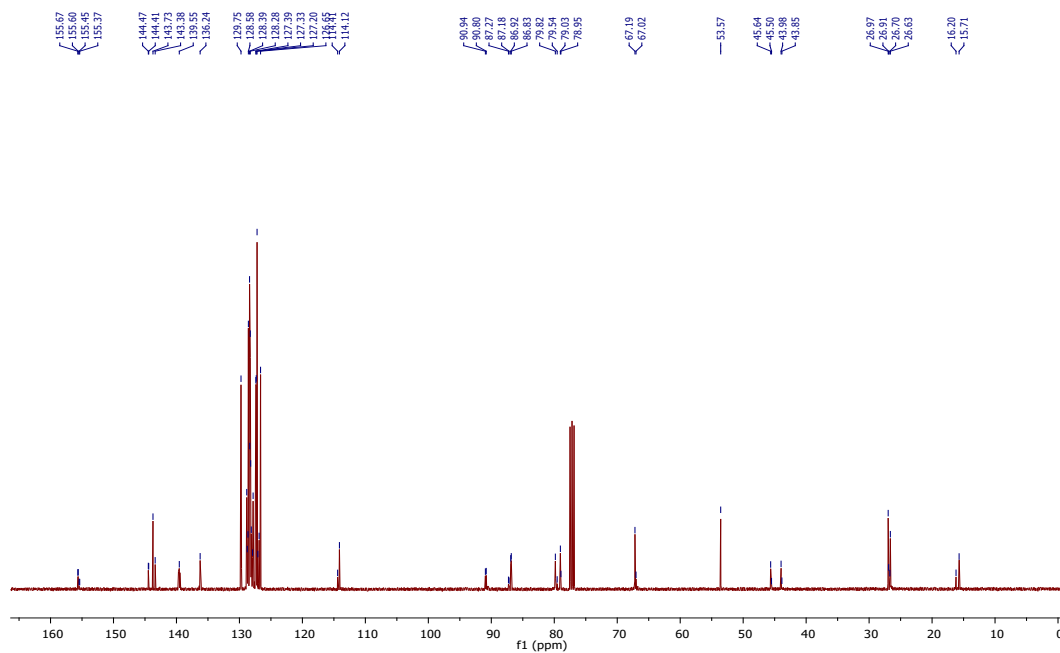

### <sup>31</sup>P NMR Spectrum 6g

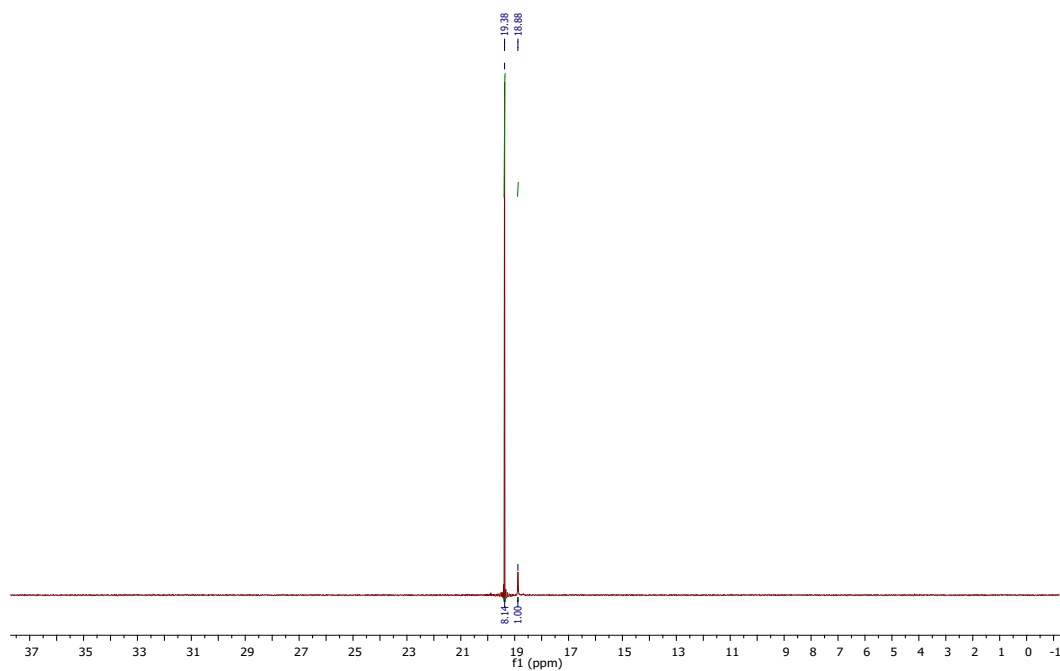

### <sup>1</sup>H NMR Spectrum **6h**

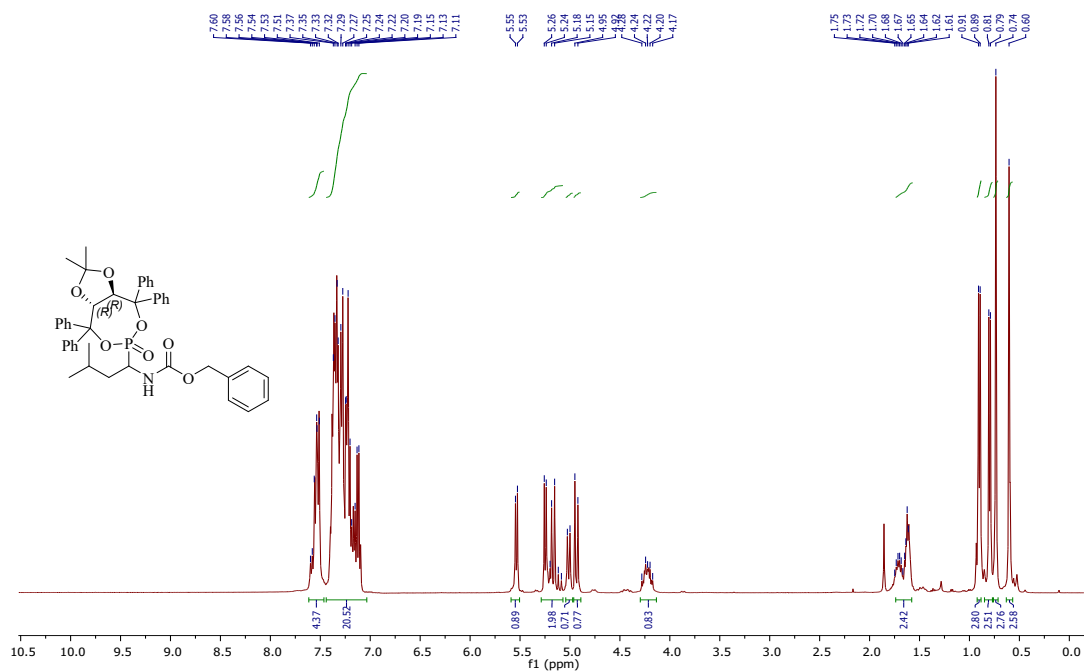

### <sup>13</sup>C NMR Spectrum **6h**

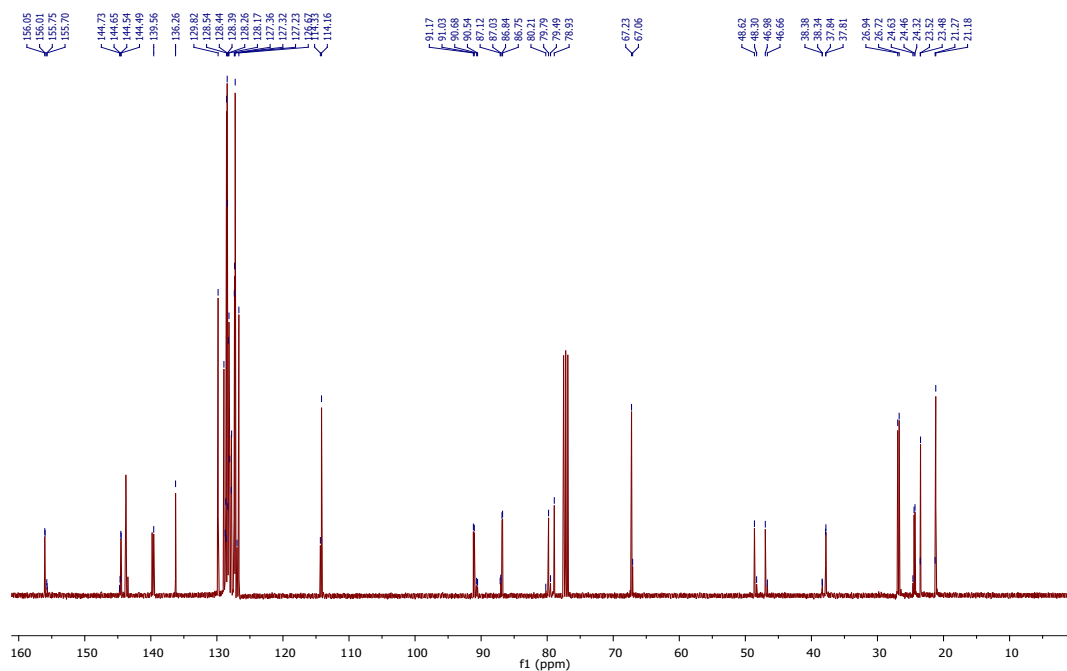

### $^{31}\text{P}$ NMR Spectrum **6h**

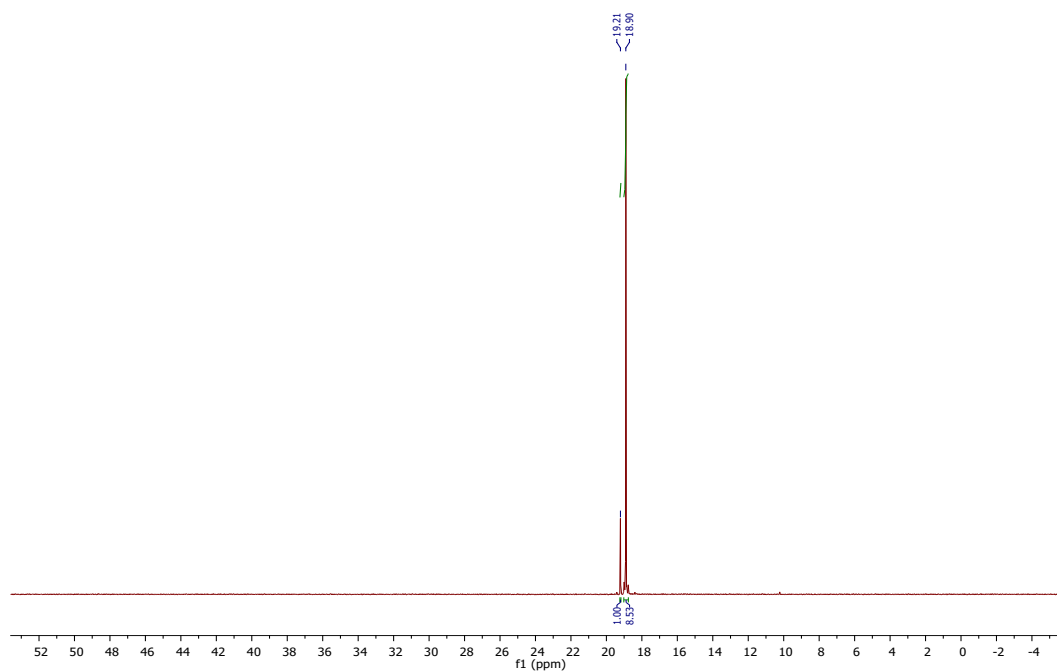

### $^1\text{H}$ NMR Spectrum (**R**)-**7a**

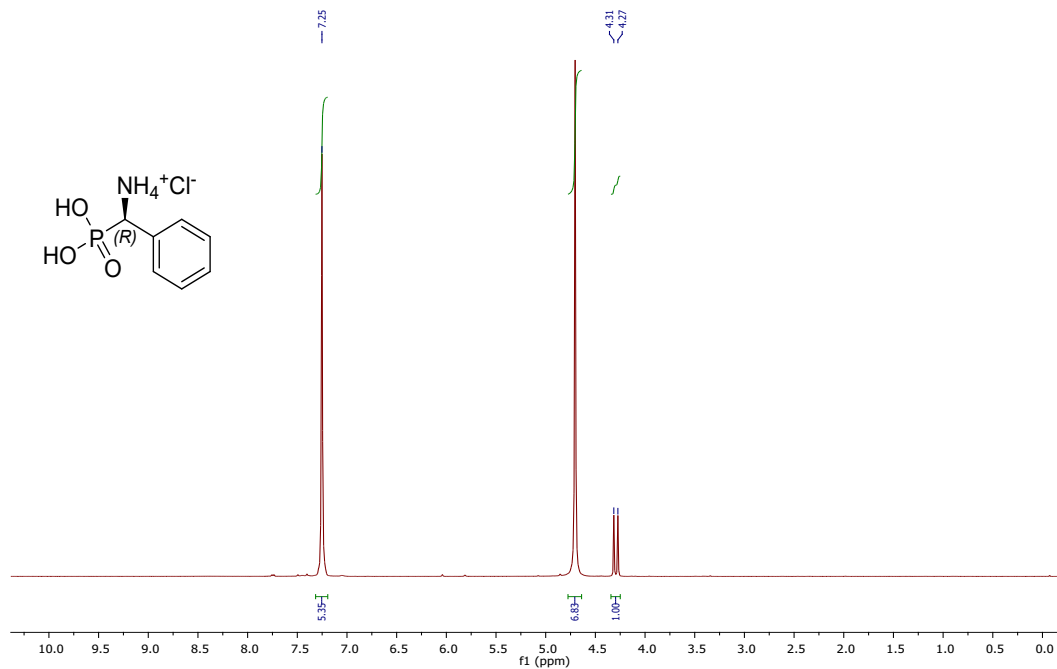

### <sup>13</sup>C NMR Spectrum (*R*)-7a

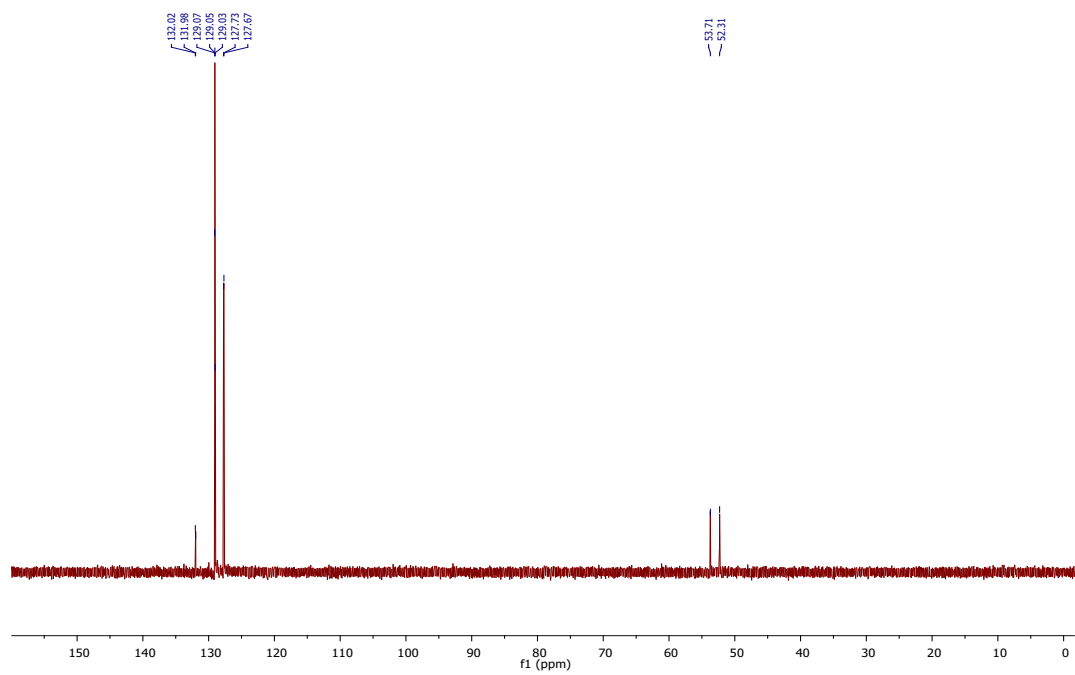

### <sup>31</sup>P NMR Spectrum (*R*)-7a

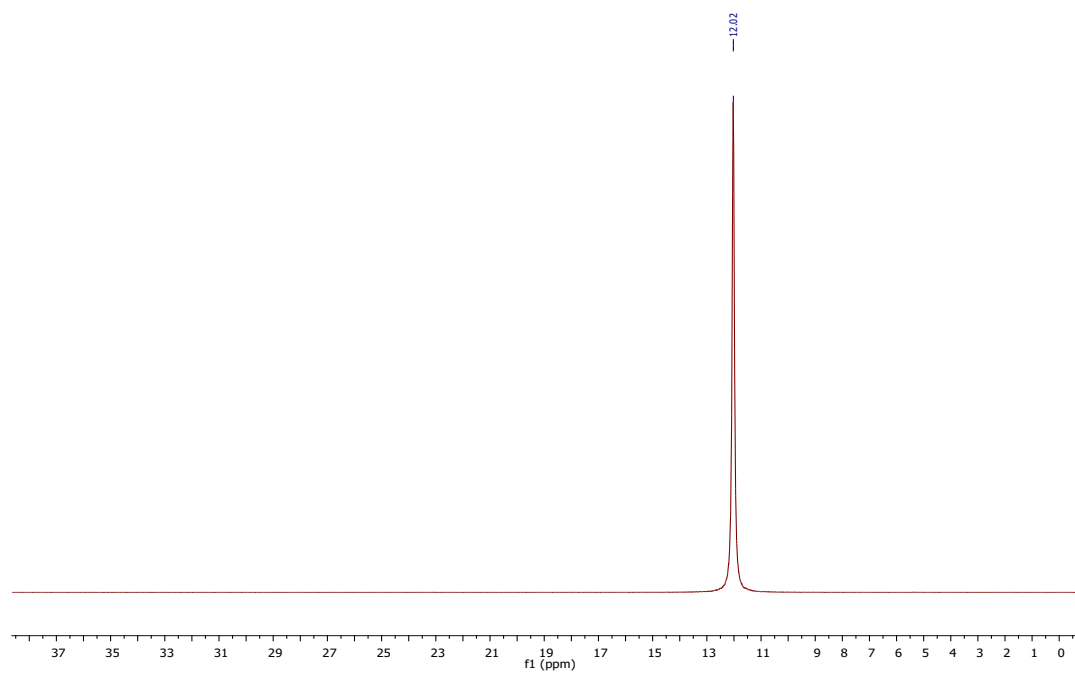



### <sup>1</sup>H NMR Spectrum (*R*)-7b

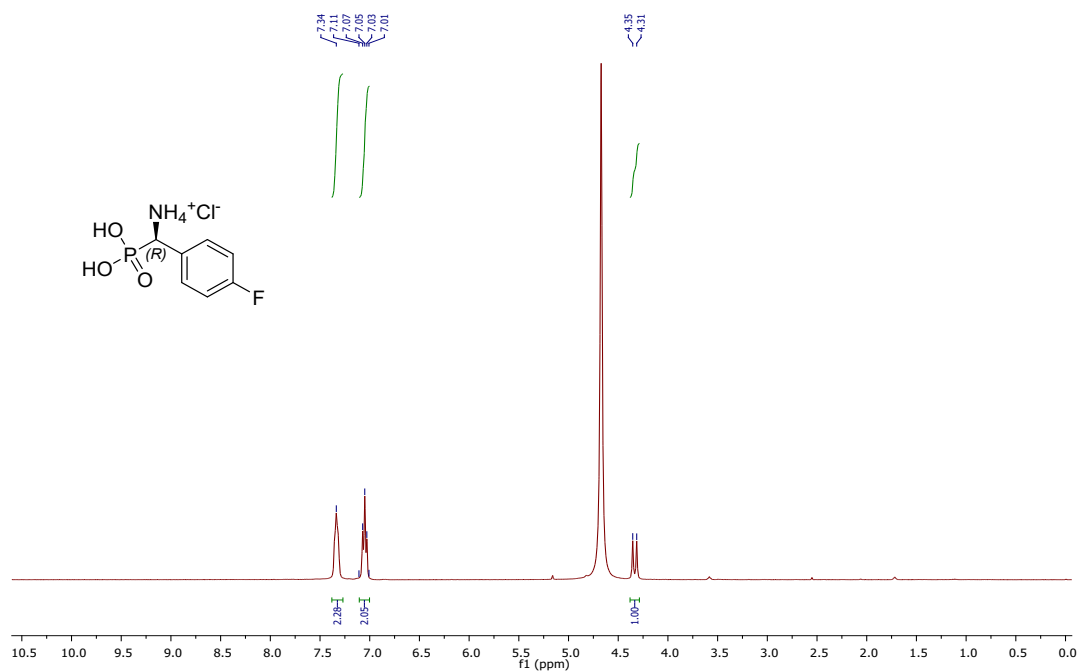

### <sup>13</sup>C NMR Spectrum (*R*)-7b

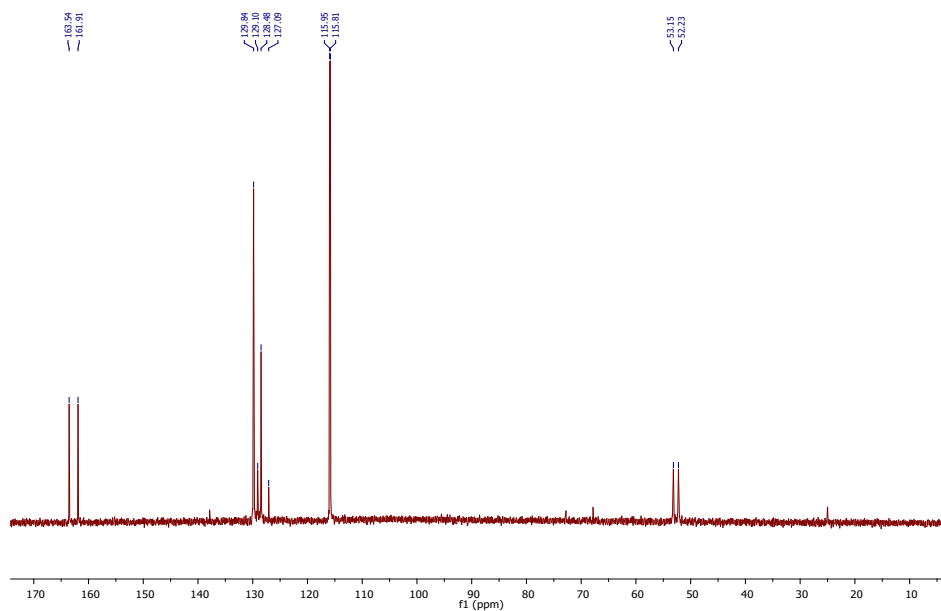

## <sup>31</sup>P NMR Spectrum (**R**)-7b

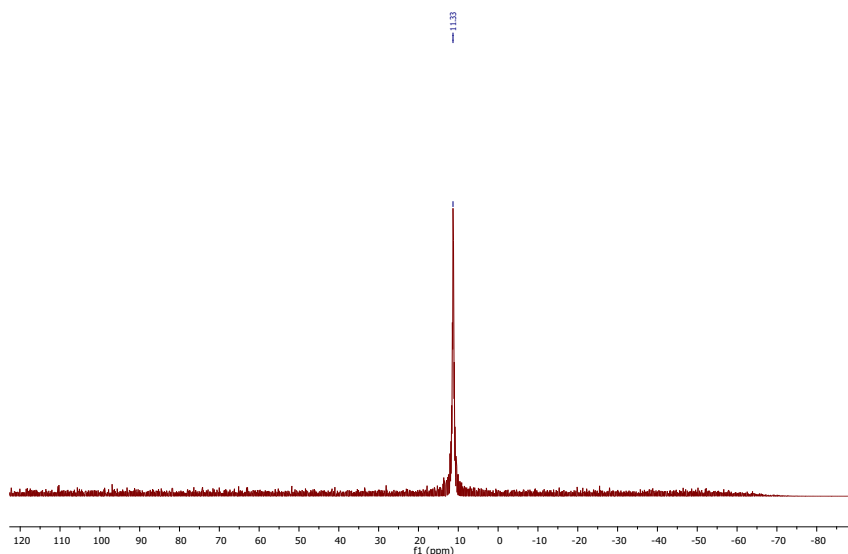

## 11. References

1. Tillman, A. L., Ye, J. & Dixon, D. J. Direct enantio- and diastereoselective Mannich reactions of malonate and  $\beta$ -keto esters with N-Boc and N-Cbz aldimines catalysed by a bifunctional cinchonine derivative. *Chemical Communications* 1191–1193 (2006) doi:10.1039/B515725K/.
2. Ollevier, T. & Li, Z. Bismuth triflate-catalyzed addition of allylsilanes to N-alkoxycarbonylamino sulfones: Convenient access to 3-Cbz-protected cyclohexenylamines. *Adv Synth Catal* **351**, 3251–3259 (2009).
3. Barber, D. M., Uriš, A. D., Thompson, A. L., Sanganee, H. J. & Dixon, D. J. One-Pot Asymmetric Nitro-Mannich/Hydroamination Cascades for the Synthesis of Pyrrolidine Derivatives: Combining Organocatalysis and Gold Catalysis. (2014) doi:10.1021/cs401008v.
4. Mbofana, C. T. & Miller, S. J. Diastereo- and enantioselective addition of anilide-functionalized allenates to N-acylimines catalyzed by a pyridylalanine-based peptide. *J Am Chem Soc* **136**, 3285–3292 (2014).
5. Das, B., Damodar, K. & Bhunia, N. A simple and efficient access to  $\alpha$ -amino phosphonates from N-benzyloxycarbonylamino sulfones using indium (III) chloride. *Journal of Organic Chemistry* **74**, 5607–5609 (2009).
6. Yuan, C., Wang, G. & Chen, S. Studies on organophosphorus compounds XLVI: a facile and direct route to dialkyl 1-(benzyl(oxycarbonylamino)alkyl) phosphonates and dialkyl or diphenyl (benzyloxycarbonylamino)benzylphosphonates. *Synthesis (Stuttg)* **1990**, 522–524 (1990).
7. Mucha, A., Kafarski, P., Plenat, F. & Cristau, H.-J. Preparation of Benzyl N-Benzyloxycarbonylamino phosphonates and -Amino phosphonites-The scope and limitations of o-Benzyl-N, N'-Dicyclohexylisourea method. *Phosphorus, Sulfur, and Silicon and the Related Elements* **105**, 187–193 (1995).
8. Yuan, C., Xu, C. & Zhang, Y. Enzymatic synthesis of optically active 1- and 2-aminoalkanephosphonates. *Tetrahedron* **59**, 6095–6102 (2003).
